# Supplementary material for: A flexible method for estimating the fraction of fitness influencing mutations from large sequencing data sets
Source: HighWire-hosted journal article supplement (doi:10.1101/gr.203059.115), 2016-04-14
Supplement: Supp_Tables_S1-S4.xlsx [file Supp_Tables_S1-S4.xlsx]

## Sheet: Supplemental Table S1
Mutation type(Ancestral -> Derived)			Nonsyn.	Syn.	Intron
CpG	Transitions	NCG->NTG	66853	27134	28525
		CGN->CAN	66028	27429	28468
	Transversions	NCG->NAG	2830	1333	1321
		CGN->CTN	2950	1418	1324
		NCG->NGG	2899	1303	1088
		CGN->CCN	2857	1303	1110
gBGC	Transitions	A->G	47022	13705	41440
		T->C	47770	13743	42002
	Transversions	A->C	10544	3100	9297
		T->G	10919	3293	9503
Non-CpG & Non-gBGC	Transitions		88953	34382	89935
	Transversions		97158	22995	72052
TOTAL			446783	151138	326065

## Sheet: Supplemental Table S2
Gene Ontology
GO ID	Number of genes	f_EA	f_AA	Description
GO:0046620	11	-0.976522	-0.959402	regulation of organ growth
GO:0050710	10	-0.969162	-0.948261	negative regulation of cytokine secretion
GO:0052695	14	-0.920363	-0.942964	cellular glucuronidation
GO:1901653	10	0.128356	-0.932992	cellular response to peptide
GO:0002526	14	0.796605	-0.898231	acute inflammatory response
GO:0071385	15	0.762283	-0.888776	cellular response to glucocorticoid stimulus
GO:0043950	10	0.652354	-0.845855	positive regulation of cAMP-mediated signaling
GO:0031648	16	0.915428	-0.827422	protein destabilization
GO:0048103	10	-0.537715	-0.813799	somatic stem cell division
GO:0045333	17	-0.927599	-0.804849	cellular respiration
GO:0051881	18	-0.827086	-0.76746	regulation of mitochondrial membrane potential
GO:0071425	10	-0.954686	-0.749906	hematopoietic stem cell proliferation
GO:0008406	23	-0.918401	-0.745548	gonad development
GO:0006959	37	-0.26504	-0.733377	humoral immune response
GO:0007342	11	-0.802466	-0.731208	fusion of sperm to egg plasma membrane
GO:0006790	12	-0.909638	-0.717103	sulfur compound metabolic process
GO:0055008	11	-0.283339	-0.713699	cardiac muscle tissue morphogenesis
GO:0046135	12	-0.70681	-0.706658	pyrimidine nucleoside catabolic process
GO:0006839	16	-0.90361	-0.705907	mitochondrial transport
GO:0060317	11	-0.308621	-0.698833	cardiac epithelial to mesenchymal transition
GO:0046928	14	-0.883809	-0.689414	regulation of neurotransmitter secretion
GO:0008334	12	-0.898966	-0.685287	histone mRNA metabolic process
GO:0030208	10	-0.885421	-0.640888	dermatan sulfate biosynthetic process
GO:0042770	10	-0.949134	-0.634548	signal transduction in response to DNA damage
GO:0010508	17	-0.562528	-0.622489	positive regulation of autophagy
GO:0009948	15	-0.78549	-0.621807	anterior/posterior axis specification
GO:0006501	21	0.002457	-0.620852	C-terminal protein lipidation
GO:0035855	10	0.303065	-0.61944	megakaryocyte development
GO:0006402	13	-0.89859	-0.613942	mRNA catabolic process
GO:0016254	13	0.071176	-0.611481	preassembly of GPI anchor in ER membrane
GO:0055003	11	-0.553746	-0.606695	cardiac myofibril assembly
GO:0006707	10	-0.78182	-0.605362	cholesterol catabolic process
GO:0050892	10	0.029366	-0.587095	intestinal absorption
GO:0050927	11	-0.622731	-0.583395	positive regulation of positive chemotaxis
GO:0048536	25	0.095022	-0.57168	spleen development
GO:0043280	35	-0.828993	-0.560004	positive regulation of cysteine-type endopeptidase activity involved in apoptotic process
GO:0009060	18	-0.6577	-0.545119	aerobic respiration
GO:0045019	10	0.762334	-0.537518	negative regulation of nitric oxide biosynthetic process
GO:0042417	11	-0.957093	-0.530461	dopamine metabolic process
GO:0006699	21	0.253801	-0.52589	bile acid biosynthetic process
GO:0007076	12	0.025783	-0.525876	mitotic chromosome condensation
GO:0050965	10	-0.751865	-0.521763	detection of temperature stimulus involved in sensory perception of pain
GO:0042267	12	0.213853	-0.498736	natural killer cell mediated cytotoxicity
GO:0000075	17	0.29367	-0.497361	cell cycle checkpoint
GO:0002042	13	-0.732739	-0.492574	cell migration involved in sprouting angiogenesis
GO:0034660	21	-0.014122	-0.489492	ncRNA metabolic process
GO:0050901	10	-0.302558	-0.481978	leukocyte tethering or rolling
GO:0031069	24	-0.753295	-0.4716	hair follicle morphogenesis
GO:0000387	24	0.036849	-0.465936	spliceosomal snRNP assembly
GO:0048511	14	-0.612547	-0.458711	rhythmic process
GO:0006637	12	-0.826757	-0.457705	acyl-CoA metabolic process
GO:0023019	20	-0.874885	-0.448327	signal transduction involved in regulation of gene expression
GO:0030889	13	0.754376	-0.442073	negative regulation of B cell proliferation
GO:0030073	26	-0.816996	-0.434863	insulin secretion
GO:0045104	13	-0.780311	-0.427298	intermediate filament cytoskeleton organization
GO:0032722	14	-0.907762	-0.423301	positive regulation of chemokine production
GO:0050832	15	-0.894877	-0.42315	defense response to fungus
GO:0007131	26	-0.107625	-0.407713	reciprocal meiotic recombination
GO:0045579	10	-0.892685	-0.406642	positive regulation of B cell differentiation
GO:0048477	17	0.53245	-0.402797	oogenesis
GO:0000266	11	0.119312	-0.402711	mitochondrial fission
GO:0002687	11	-0.063875	-0.397754	positive regulation of leukocyte migration
GO:0016575	16	-0.057494	-0.394669	histone deacetylation
GO:0051145	18	0.775591	-0.392822	smooth muscle cell differentiation
GO:0006400	12	0.189028	-0.390176	tRNA modification
GO:0030031	10	0.192268	-0.388817	cell projection assembly
GO:0006044	12	-0.26318	-0.387423	N-acetylglucosamine metabolic process
GO:0033365	12	0.902678	-0.379161	protein localization to organelle
GO:2001239	10	-0.413665	-0.375273	regulation of extrinsic apoptotic signaling pathway in absence of ligand
GO:0090399	10	-0.8933	-0.364178	replicative senescence
GO:0030325	22	0.809277	-0.357912	adrenal gland development
GO:0045089	14	-0.895187	-0.354824	positive regulation of innate immune response
GO:0007252	10	-0.75565	-0.352271	I-kappaB phosphorylation
GO:0045947	10	-0.755476	-0.34032	negative regulation of translational initiation
GO:0045776	20	-0.942492	-0.336134	negative regulation of blood pressure
GO:0045618	10	0.586685	-0.335535	positive regulation of keratinocyte differentiation
GO:0009617	28	0.40871	-0.33238	response to bacterium
GO:0030193	10	-0.713325	-0.324896	regulation of blood coagulation
GO:0051298	10	-0.874263	-0.320604	centrosome duplication
GO:0001759	14	-0.871835	-0.296716	organ induction
GO:0031076	10	-0.873152	-0.29091	embryonic camera-type eye development
GO:0021895	10	0.912897	-0.290199	cerebral cortex neuron differentiation
GO:0002031	10	-0.124854	-0.285149	G-protein coupled receptor internalization
GO:0006325	19	-0.853514	-0.284077	chromatin organization
GO:0071276	14	0.293176	-0.280508	cellular response to cadmium ion
GO:0006595	13	-0.459647	-0.268425	polyamine metabolic process
GO:0001841	13	-0.87029	-0.266122	neural tube formation
GO:0043517	11	-0.921756	-0.265192	positive regulation of DNA damage response, signal transduction by p53 class mediator
GO:0032924	11	-0.424409	-0.256467	activin receptor signaling pathway
GO:0060395	16	-0.01481	-0.233073	SMAD protein signal transduction
GO:0051894	14	-0.721409	-0.228801	positive regulation of focal adhesion assembly
GO:0033160	12	-0.699174	-0.224804	positive regulation of protein import into nucleus, translocation
GO:0046641	10	-0.420351	-0.19535	positive regulation of alpha-beta T cell proliferation
GO:0032967	18	-0.148894	-0.18426	positive regulation of collagen biosynthetic process
GO:0021772	19	0.277083	-0.1816	olfactory bulb development
GO:0046676	22	0.346534	-0.163797	negative regulation of insulin secretion
GO:0008210	11	0.293012	-0.162762	estrogen metabolic process
GO:0007610	28	0.830383	-0.159913	behavior
GO:0009880	20	-0.495213	-0.15705	embryonic pattern specification
GO:0019835	13	-0.001252	-0.156941	cytolysis
GO:0047496	11	0.012597	-0.156729	vesicle transport along microtubule
GO:0043623	11	-0.689279	-0.145932	cellular protein complex assembly
GO:0031297	10	0.256228	-0.145136	replication fork processing
GO:0051482	12	0.774309	-0.142901	positive regulation of cytosolic calcium ion concentration involved in phospholipase C-activating G-protein coupled signaling pathway
GO:0021756	10	-0.146483	-0.139001	striatum development
GO:0007126	44	0.492697	-0.137312	meiosis
GO:0048147	20	-0.05701	-0.134432	negative regulation of fibroblast proliferation
GO:0019882	30	-0.527183	-0.115724	antigen processing and presentation
GO:0009968	18	-0.576508	-0.103879	negative regulation of signal transduction
GO:0016338	18	-0.740511	-0.100562	calcium-independent cell-cell adhesion
GO:0035235	13	0.287021	-0.091384	ionotropic glutamate receptor signaling pathway
GO:0006694	29	0.5381	-0.086495	steroid biosynthetic process
GO:0006081	12	0.631585	-0.084634	cellular aldehyde metabolic process
GO:0045597	36	-0.924974	-0.077187	positive regulation of cell differentiation
GO:0045779	11	0.749373	-0.071973	negative regulation of bone resorption
GO:0002218	11	-0.851437	-0.065096	activation of innate immune response
GO:0090009	10	0.746661	-0.057371	primitive streak formation
GO:0006103	16	-0.766341	-0.054658	2-oxoglutarate metabolic process
GO:0048814	13	-0.843116	-0.053244	regulation of dendrite morphogenesis
GO:0006479	25	0.324461	-0.039964	protein methylation
GO:0034614	15	-0.678748	-0.039146	cellular response to reactive oxygen species
GO:0007129	12	0.932048	-0.037691	synapsis
GO:0060484	10	-0.863366	-0.025205	lung-associated mesenchyme development
GO:0072332	20	-0.206115	-0.024631	intrinsic apoptotic signaling pathway by p53 class mediator
GO:0045777	15	-0.95372	0.680308	positive regulation of blood pressure
GO:0007171	10	-0.938568	0.395453	activation of transmembrane receptor protein tyrosine kinase activity
GO:0035815	12	-0.934436	0.164681	positive regulation of renal sodium excretion
GO:0002690	10	-0.931032	0.232621	positive regulation of leukocyte chemotaxis
GO:0007263	12	-0.928787	0.312034	nitric oxide mediated signal transduction
GO:0019915	17	-0.921612	0.628175	lipid storage
GO:0030259	22	-0.909041	0.206449	lipid glycosylation
GO:0036150	15	-0.906994	0.567885	phosphatidylserine acyl-chain remodeling
GO:0021879	10	-0.897637	0.955589	forebrain neuron differentiation
GO:0050768	15	-0.878366	0.166963	negative regulation of neurogenesis
GO:0021675	13	-0.872994	0.08149	nerve development
GO:0007080	10	-0.864302	0.677444	mitotic metaphase plate congression
GO:0044130	17	-0.854201	0.477938	negative regulation of growth of symbiont in host
GO:0000038	14	-0.837279	0.325356	very long-chain fatty acid metabolic process
GO:0031953	10	-0.836981	0.808951	negative regulation of protein autophosphorylation
GO:0009117	13	-0.829582	0.162365	nucleotide metabolic process
GO:0014032	15	-0.825061	0.31236	neural crest cell development
GO:0002931	15	-0.8209	0.342657	response to ischemia
GO:0048678	25	-0.806987	0.316864	response to axon injury
GO:0015074	11	-0.800022	0.576952	DNA integration
GO:0060038	12	-0.791805	0.633573	cardiac muscle cell proliferation
GO:0048712	10	-0.785711	0.574141	negative regulation of astrocyte differentiation
GO:0050482	14	-0.782794	0.801891	arachidonic acid secretion
GO:0050995	14	-0.782681	0.836115	negative regulation of lipid catabolic process
GO:0045744	10	-0.773719	0.182944	negative regulation of G-protein coupled receptor protein signaling pathway
GO:0010975	10	-0.767415	0.501909	regulation of neuron projection development
GO:0003281	16	-0.761719	0.132345	ventricular septum development
GO:0060045	19	-0.739124	0.333562	positive regulation of cardiac muscle cell proliferation
GO:0007187	40	-0.726046	0.639176	G-protein coupled receptor signaling pathway, coupled to cyclic nucleotide second messenger
GO:0033137	15	-0.723127	0.497091	negative regulation of peptidyl-serine phosphorylation
GO:0051930	15	-0.7217	0.179226	regulation of sensory perception of pain
GO:0051443	10	-0.710761	0.722072	positive regulation of ubiquitin-protein ligase activity
GO:0006120	37	-0.687482	0.766171	mitochondrial electron transport, NADH to ubiquinone
GO:0043928	23	-0.686505	0.347982	exonucleolytic nuclear-transcribed mRNA catabolic process involved in deadenylation-dependent decay
GO:0071236	11	-0.659164	0.828971	cellular response to antibiotic
GO:0051281	19	-0.654203	0.718287	positive regulation of release of sequestered calcium ion into cytosol
GO:0048169	19	-0.653034	0.68097	regulation of long-term neuronal synaptic plasticity
GO:0014003	21	-0.641521	0.252166	oligodendrocyte development
GO:0060413	11	-0.640417	0.426624	atrial septum morphogenesis
GO:0043249	10	-0.622531	0.298419	erythrocyte maturation
GO:0045600	27	-0.617305	0.287549	positive regulation of fat cell differentiation
GO:0006646	14	-0.571829	0.077255	phosphatidylethanolamine biosynthetic process
GO:0048853	11	-0.553274	0.826015	forebrain morphogenesis
GO:0030207	12	-0.553051	0.373047	chondroitin sulfate catabolic process
GO:0021542	14	-0.544448	0.952764	dentate gyrus development
GO:0050678	11	-0.539523	0.696073	regulation of epithelial cell proliferation
GO:2001238	27	-0.53869	0.247824	positive regulation of extrinsic apoptotic signaling pathway
GO:0007512	14	-0.516966	0.164309	adult heart development
GO:0007369	27	-0.508765	0.420066	gastrulation
GO:0043968	12	-0.5031	0.318011	histone H2A acetylation
GO:0035249	17	-0.485865	0.156883	synaptic transmission, glutamatergic
GO:0043124	27	-0.470745	0.574666	negative regulation of I-kappaB kinase/NF-kappaB signaling
GO:0007210	11	-0.469526	0.917921	serotonin receptor signaling pathway
GO:0045861	17	-0.469077	0.890151	negative regulation of proteolysis
GO:0035136	11	-0.465698	0.686382	forelimb morphogenesis
GO:0032733	16	-0.461127	0.733292	positive regulation of interleukin-10 production
GO:0003148	10	-0.451636	0.890406	outflow tract septum morphogenesis
GO:0051258	26	-0.442958	0.662573	protein polymerization
GO:0048490	13	-0.436085	0.618835	anterograde synaptic vesicle transport
GO:0042554	11	-0.435373	0.329979	superoxide anion generation
GO:0046034	19	-0.415571	0.49021	ATP metabolic process
GO:0015908	13	-0.383514	0.635602	fatty acid transport
GO:0009235	19	-0.373934	0.035076	cobalamin metabolic process
GO:0006656	23	-0.370537	0.267226	phosphatidylcholine biosynthetic process
GO:0009987	14	-0.367375	0.633356	cellular process
GO:0045088	12	-0.364927	0.406238	regulation of innate immune response
GO:0032715	19	-0.342788	0.206856	negative regulation of interleukin-6 production
GO:2001243	22	-0.336221	0.03897	negative regulation of intrinsic apoptotic signaling pathway
GO:0032091	28	-0.316561	0.071347	negative regulation of protein binding
GO:0006376	13	-0.307946	0.972962	mRNA splice site selection
GO:0006379	10	-0.292412	0.44383	mRNA cleavage
GO:0071371	14	-0.282986	0.553655	cellular response to gonadotropin stimulus
GO:0006914	60	-0.269873	0.237014	autophagy
GO:0032735	21	-0.267231	0.703487	positive regulation of interleukin-12 production
GO:0048844	21	-0.256642	0.309659	artery morphogenesis
GO:0001967	14	-0.242454	0.910783	suckling behavior
GO:0007178	10	-0.233474	0.371206	transmembrane receptor protein serine/threonine kinase signaling pathway
GO:0055089	10	-0.230597	0.719033	fatty acid homeostasis
GO:0050829	21	-0.226289	0.19165	defense response to Gram-negative bacterium
GO:0060134	13	-0.223076	0.317164	prepulse inhibition
GO:0090023	17	-0.221928	0.262218	positive regulation of neutrophil chemotaxis
GO:0032720	24	-0.194786	0.337054	negative regulation of tumor necrosis factor production
GO:0021846	10	-0.186885	0.334618	cell proliferation in forebrain
GO:0060425	14	-0.185226	0.610172	lung morphogenesis
GO:0006488	27	-0.180946	0.474276	dolichol-linked oligosaccharide biosynthetic process
GO:0014059	10	-0.167924	0.292725	regulation of dopamine secretion
GO:0043101	11	-0.155845	0.821053	purine-containing compound salvage
GO:0045859	16	-0.148721	0.004857	regulation of protein kinase activity
GO:1900740	22	-0.141328	0.442492	positive regulation of protein insertion into mitochondrial membrane involved in apoptotic signaling pathway
GO:0007548	15	-0.140011	0.855559	sex differentiation
GO:0009303	11	-0.116514	0.180139	rRNA transcription
GO:2001240	31	-0.110438	0.490461	negative regulation of extrinsic apoptotic signaling pathway in absence of ligand
GO:0006309	24	-0.103853	0.262779	apoptotic DNA fragmentation
GO:0000413	22	-0.090301	0.763736	protein peptidyl-prolyl isomerization
GO:0030500	13	-0.089311	0.709145	regulation of bone mineralization
GO:0006939	21	-0.088094	0.335397	smooth muscle contraction
GO:0006090	24	-0.087951	0.582603	pyruvate metabolic process
GO:0031623	30	-0.080951	0.276917	receptor internalization
GO:0031214	17	-0.079361	0.605334	biomineral tissue development
GO:0060070	64	-0.070008	0.3881	canonical Wnt signaling pathway
GO:0043967	22	-0.06912	0.599091	histone H4 acetylation
GO:0007157	28	-0.065222	0.716829	heterophilic cell-cell adhesion
GO:0032729	32	-0.063894	0.819591	positive regulation of interferon-gamma production
GO:0048557	20	-0.062696	0.454158	embryonic digestive tract morphogenesis
GO:0006600	10	-0.053669	0.857067	creatine metabolic process
GO:0048747	10	-0.047642	0.903954	muscle fiber development
GO:0060218	11	-0.038401	0.726305	hematopoietic stem cell differentiation
GO:0042254	35	-0.030775	0.542007	ribosome biogenesis
GO:0035338	16	-0.028787	0.347456	long-chain fatty-acyl-CoA biosynthetic process
GO:0045862	21	-0.023882	0.46146	positive regulation of proteolysis
GO:0007212	11	0.001585	0.855325	dopamine receptor signaling pathway
GO:0006941	14	0.004466	0.348435	striated muscle contraction
GO:0006107	10	0.009111	0.630867	oxaloacetate metabolic process
GO:0033077	33	0.041443	0.584438	T cell differentiation in thymus
GO:0017148	40	0.048565	0.821962	negative regulation of translation
GO:0009268	11	0.052356	0.548506	response to pH
GO:0045071	24	0.056291	0.46636	negative regulation of viral genome replication
GO:0042310	16	0.066216	0.591788	vasoconstriction
GO:0032319	10	0.073484	0.083567	regulation of Rho GTPase activity
GO:0031398	43	0.075515	0.5536	positive regulation of protein ubiquitination
GO:0006275	12	0.079276	0.228743	regulation of DNA replication
GO:0061098	16	0.082905	0.667368	positive regulation of protein tyrosine kinase activity
GO:0009650	10	0.084583	0.502601	UV protection
GO:0019722	33	0.087264	0.538218	calcium-mediated signaling
GO:0032313	34	0.088672	0.4356	regulation of Rab GTPase activity
GO:0014068	49	0.094296	0.373995	positive regulation of phosphatidylinositol 3-kinase signaling
GO:0018208	14	0.099668	0.824723	peptidyl-proline modification
GO:0030855	39	0.10348	0.423654	epithelial cell differentiation
GO:0046329	20	0.104011	0.643751	negative regulation of JNK cascade
GO:0042104	17	0.108524	0.61313	positive regulation of activated T cell proliferation
GO:0036148	16	0.121854	0.695393	phosphatidylglycerol acyl-chain remodeling
GO:0032331	13	0.133034	0.401032	negative regulation of chondrocyte differentiation
GO:0050727	42	0.141253	0.388691	regulation of inflammatory response
GO:0042113	26	0.143282	0.153271	B cell activation
GO:0030433	31	0.149684	0.163292	ER-associated ubiquitin-dependent protein catabolic process
GO:0048846	10	0.1531	0.348893	axon extension involved in axon guidance
GO:0006635	38	0.160444	0.394645	fatty acid beta-oxidation
GO:0006884	11	0.160774	0.047955	cell volume homeostasis
GO:0008156	18	0.166063	0.318326	negative regulation of DNA replication
GO:0010466	13	0.166074	0.662127	negative regulation of peptidase activity
GO:0051225	24	0.176411	0.472264	spindle assembly
GO:0019674	12	0.178786	0.743739	NAD metabolic process
GO:0006385	17	0.185785	0.960301	transcription elongation from RNA polymerase III promoter
GO:0006386	17	0.185785	0.960301	termination of RNA polymerase III transcription
GO:0007340	12	0.195415	0.640985	acrosome reaction
GO:0050732	11	0.197095	0.682892	negative regulation of peptidyl-tyrosine phosphorylation
GO:0090200	22	0.197843	0.835042	positive regulation of release of cytochrome c from mitochondria
GO:0030212	24	0.201573	0.549892	hyaluronan metabolic process
GO:0090004	18	0.205152	0.80911	positive regulation of establishment of protein localization to plasma membrane
GO:0001944	30	0.207426	0.54642	vasculature development
GO:0070584	11	0.210157	0.40162	mitochondrion morphogenesis
GO:0045595	34	0.212454	0.519981	regulation of cell differentiation
GO:0046328	11	0.218541	0.692231	regulation of JNK cascade
GO:0042742	83	0.219542	0.395818	defense response to bacterium
GO:0006165	15	0.219737	0.06663	nucleoside diphosphate phosphorylation
GO:0048514	24	0.221371	0.408978	blood vessel morphogenesis
GO:0043981	10	0.221625	0.167026	histone H4-K5 acetylation
GO:0043982	10	0.221625	0.167026	histone H4-K8 acetylation
GO:0036149	15	0.232104	0.755881	phosphatidylinositol acyl-chain remodeling
GO:0042177	22	0.235763	0.142982	negative regulation of protein catabolic process
GO:0001702	19	0.240925	0.627561	gastrulation with mouth forming second
GO:0032755	34	0.245818	0.218066	positive regulation of interleukin-6 production
GO:0071285	15	0.248559	0.236125	cellular response to lithium ion
GO:0033559	10	0.253629	0.544377	unsaturated fatty acid metabolic process
GO:0036109	10	0.253629	0.544377	alpha-linolenic acid metabolic process
GO:0032781	14	0.257553	0.58993	positive regulation of ATPase activity
GO:0060079	22	0.271137	0.37334	regulation of excitatory postsynaptic membrane potential
GO:0042730	17	0.277935	0.483605	fibrinolysis
GO:0034698	11	0.279419	0.841412	response to gonadotropin
GO:0050890	16	0.289442	0.508055	cognition
GO:0055010	24	0.290034	0.704684	ventricular cardiac muscle tissue morphogenesis
GO:0035810	14	0.294582	0.52745	positive regulation of urine volume
GO:0022011	11	0.29682	0.09925	myelination in peripheral nervous system
GO:0006687	33	0.297058	0.61366	glycosphingolipid metabolic process
GO:0001676	14	0.311605	0.631325	long-chain fatty acid metabolic process
GO:0045444	48	0.312132	0.594913	fat cell differentiation
GO:0061036	10	0.317671	0.729327	positive regulation of cartilage development
GO:0051770	12	0.31833	0.68923	positive regulation of nitric-oxide synthase biosynthetic process
GO:0060445	13	0.318859	0.727017	branching involved in salivary gland morphogenesis
GO:0060326	23	0.319983	0.529291	cell chemotaxis
GO:0008037	10	0.32122	0.6246	cell recognition
GO:0042523	15	0.324557	0.839947	positive regulation of tyrosine phosphorylation of Stat5 protein
GO:0045214	23	0.326231	0.458953	sarcomere organization
GO:0002544	10	0.326644	0.59718	chronic inflammatory response
GO:0006809	12	0.327194	0.602605	nitric oxide biosynthetic process
GO:0019370	17	0.328801	0.400727	leukotriene biosynthetic process
GO:0035137	10	0.329399	0.933006	hindlimb morphogenesis
GO:0048598	16	0.330731	0.777235	embryonic morphogenesis
GO:0010507	14	0.332698	0.717792	negative regulation of autophagy
GO:0034605	22	0.333919	0.257584	cellular response to heat
GO:0001916	16	0.335803	0.279066	positive regulation of T cell mediated cytotoxicity
GO:0009409	28	0.336116	0.612373	response to cold
GO:0008033	54	0.337969	0.315509	tRNA processing
GO:0055007	25	0.343122	0.578039	cardiac muscle cell differentiation
GO:0070328	20	0.345468	0.44388	triglyceride homeostasis
GO:0016571	20	0.346276	0.556705	histone methylation
GO:0010001	16	0.347385	0.661875	glial cell differentiation
GO:0036152	21	0.349762	0.795975	phosphatidylethanolamine acyl-chain remodeling
GO:0048754	31	0.349856	0.447566	branching morphogenesis of an epithelial tube
GO:0051209	25	0.349875	0.547762	release of sequestered calcium ion into cytosol
GO:0015695	10	0.35351	0.267217	organic cation transport
GO:0051496	28	0.358056	0.607853	positive regulation of stress fiber assembly
GO:0050860	11	0.358812	0.574564	negative regulation of T cell receptor signaling pathway
GO:0031396	11	0.359793	0.780791	regulation of protein ubiquitination
GO:0045665	47	0.360709	0.318524	negative regulation of neuron differentiation
GO:0042572	19	0.361065	0.593757	retinol metabolic process
GO:0019395	13	0.365077	0.855597	fatty acid oxidation
GO:2000045	12	0.365511	0.809853	regulation of G1/S transition of mitotic cell cycle
GO:0048009	12	0.367669	0.835614	insulin-like growth factor receptor signaling pathway
GO:0043922	10	0.368971	0.310375	negative regulation by host of viral transcription
GO:0071345	20	0.373949	0.55576	cellular response to cytokine stimulus
GO:0042593	71	0.375387	0.541873	glucose homeostasis
GO:0008340	12	0.378581	0.428464	determination of adult lifespan
GO:0022904	82	0.381213	0.303358	respiratory electron transport chain
GO:0030183	43	0.385532	0.360414	B cell differentiation
GO:0034080	21	0.387616	0.571552	CENP-A containing nucleosome assembly at centromere
GO:0090201	13	0.390406	0.714566	negative regulation of release of cytochrome c from mitochondria
GO:0060348	31	0.390672	0.458512	bone development
GO:0002230	14	0.390869	0.440904	positive regulation of defense response to virus by host
GO:0031325	10	0.391789	0.65824	positive regulation of cellular metabolic process
GO:0030518	12	0.395302	0.704576	intracellular steroid hormone receptor signaling pathway
GO:0030163	42	0.399118	0.570493	protein catabolic process
GO:0042517	24	0.403132	0.819327	positive regulation of tyrosine phosphorylation of Stat3 protein
GO:0007608	41	0.411664	0.442557	sensory perception of smell
GO:0007094	31	0.411693	0.255904	mitotic spindle assembly checkpoint
GO:0043252	12	0.411791	0.779044	sodium-independent organic anion transport
GO:0030204	40	0.414999	0.665851	chondroitin sulfate metabolic process
GO:0008344	48	0.417058	0.778559	adult locomotory behavior
GO:0007052	16	0.418137	0.370839	mitotic spindle organization
GO:0051480	19	0.420232	0.617011	cytosolic calcium ion homeostasis
GO:0030866	16	0.42192	0.351583	cortical actin cytoskeleton organization
GO:0007631	31	0.423639	0.662113	feeding behavior
GO:0036151	23	0.424851	0.679481	phosphatidylcholine acyl-chain remodeling
GO:0006206	24	0.425819	0.308807	pyrimidine nucleobase metabolic process
GO:0006383	37	0.426106	0.900468	transcription from RNA polymerase III promoter
GO:0007250	14	0.428699	0.175651	activation of NF-kappaB-inducing kinase activity
GO:0016125	16	0.431058	0.486364	sterol metabolic process
GO:0070936	36	0.432756	0.505704	protein K48-linked ubiquitination
GO:0007093	24	0.435557	0.31022	mitotic cell cycle checkpoint
GO:1901215	10	0.439107	0.636777	negative regulation of neuron death
GO:0001953	10	0.439165	0.554474	negative regulation of cell-matrix adhesion
GO:0007040	32	0.439232	0.577553	lysosome organization
GO:0051603	31	0.441379	0.481757	proteolysis involved in cellular protein catabolic process
GO:0030878	19	0.442225	0.453705	thyroid gland development
GO:0002026	18	0.442385	0.657093	regulation of the force of heart contraction
GO:0015701	27	0.443448	0.53713	bicarbonate transport
GO:0008625	30	0.444208	0.209335	extrinsic apoptotic signaling pathway via death domain receptors
GO:0042102	44	0.44497	0.449756	positive regulation of T cell proliferation
GO:0051131	12	0.450126	0.337869	chaperone-mediated protein complex assembly
GO:0051297	21	0.450177	0.385256	centrosome organization
GO:0046474	82	0.4507	0.56395	glycerophospholipid biosynthetic process
GO:0035176	30	0.450971	0.205124	social behavior
GO:0006813	98	0.45473	0.606947	potassium ion transport
GO:2000251	10	0.458819	0.55831	positive regulation of actin cytoskeleton reorganization
GO:0045596	37	0.459629	0.190923	negative regulation of cell differentiation
GO:0002063	14	0.462687	0.3268	chondrocyte development
GO:0048246	10	0.463858	0.332453	macrophage chemotaxis
GO:0006730	27	0.464877	0.403183	one-carbon metabolic process
GO:0006952	77	0.465868	0.426765	defense response
GO:0060337	45	0.466009	0.661641	type I interferon signaling pathway
GO:0042445	15	0.468509	0.244067	hormone metabolic process
GO:0009395	11	0.471223	0.788648	phospholipid catabolic process
GO:1901687	19	0.472702	0.642947	glutathione derivative biosynthetic process
GO:0030206	21	0.473299	0.519219	chondroitin sulfate biosynthetic process
GO:0050918	23	0.473344	0.818832	positive chemotaxis
GO:0043122	10	0.473551	0.836886	regulation of I-kappaB kinase/NF-kappaB signaling
GO:0010880	14	0.474446	0.890112	regulation of release of sequestered calcium ion into cytosol by sarcoplasmic reticulum
GO:0048513	13	0.475741	0.541596	organ development
GO:0006953	33	0.475818	0.654007	acute-phase response
GO:0006509	16	0.476214	0.189982	membrane protein ectodomain proteolysis
GO:0007338	41	0.476621	0.501063	single fertilization
GO:0006631	58	0.483316	0.51747	fatty acid metabolic process
GO:0009408	43	0.483674	0.554549	response to heat
GO:0046579	15	0.484346	0.488976	positive regulation of Ras protein signal transduction
GO:0044262	10	0.48467	0.495478	cellular carbohydrate metabolic process
GO:0051259	43	0.485115	0.426543	protein oligomerization
GO:0007519	47	0.486607	0.290958	skeletal muscle tissue development
GO:0021537	20	0.487561	0.817537	telencephalon development
GO:0030513	20	0.490576	0.815477	positive regulation of BMP signaling pathway
GO:0070534	23	0.491531	0.219619	protein K63-linked ubiquitination
GO:0050776	63	0.492647	0.384334	regulation of immune response
GO:0001829	17	0.494966	0.909061	trophectodermal cell differentiation
GO:0045446	10	0.497068	0.743647	endothelial cell differentiation
GO:0021680	13	0.498278	0.638868	cerebellar Purkinje cell layer development
GO:0071526	14	0.49904	0.806824	semaphorin-plexin signaling pathway
GO:0019079	11	0.500359	0.412331	viral genome replication
GO:0048663	28	0.503069	0.410003	neuron fate commitment
GO:0032481	57	0.504387	0.611834	positive regulation of type I interferon production
GO:0007162	25	0.504644	0.572651	negative regulation of cell adhesion
GO:0007597	14	0.505476	0.525923	blood coagulation, intrinsic pathway
GO:0050830	38	0.507403	0.483152	defense response to Gram-positive bacterium
GO:0000060	21	0.507825	0.547175	protein import into nucleus, translocation
GO:0048205	13	0.509331	0.892656	COPI coating of Golgi vesicle
GO:0032689	21	0.509391	0.526122	negative regulation of interferon-gamma production
GO:0000226	64	0.50966	0.503167	microtubule cytoskeleton organization
GO:0006956	21	0.510725	0.519136	complement activation
GO:0048935	10	0.510962	0.800459	peripheral nervous system neuron development
GO:0006259	32	0.515441	0.498564	DNA metabolic process
GO:0035264	66	0.515611	0.492446	multicellular organism growth
GO:0036342	16	0.516433	0.592941	post-anal tail morphogenesis
GO:0008589	14	0.516946	0.66877	regulation of smoothened signaling pathway
GO:0006612	16	0.521155	0.797609	protein targeting to membrane
GO:0048596	16	0.521895	0.496474	embryonic camera-type eye morphogenesis
GO:0010800	12	0.523244	0.496338	positive regulation of peptidyl-threonine phosphorylation
GO:0032092	32	0.524064	0.564762	positive regulation of protein binding
GO:0006633	46	0.524157	0.53771	fatty acid biosynthetic process
GO:0001657	45	0.52493	0.666984	ureteric bud development
GO:0007259	23	0.52594	0.605085	JAK-STAT cascade
GO:0048484	12	0.527466	0.31069	enteric nervous system development
GO:0010038	13	0.528897	0.634895	response to metal ion
GO:0010043	27	0.530763	0.385623	response to zinc ion
GO:0017144	24	0.530914	0.553861	drug metabolic process
GO:0030218	39	0.531497	0.626326	erythrocyte differentiation
GO:0043393	20	0.532504	0.668638	regulation of protein binding
GO:0032869	58	0.53275	0.562615	cellular response to insulin stimulus
GO:0006767	75	0.533617	0.576585	water-soluble vitamin metabolic process
GO:0001935	11	0.534333	0.657207	endothelial cell proliferation
GO:0032088	47	0.534971	0.637487	negative regulation of NF-kappaB transcription factor activity
GO:0001707	30	0.535425	0.491674	mesoderm formation
GO:0006885	19	0.535541	0.645056	regulation of pH
GO:0050715	24	0.536135	0.161916	positive regulation of cytokine secretion
GO:0006164	11	0.537081	0.429434	purine nucleotide biosynthetic process
GO:0006360	25	0.538499	0.63956	transcription from RNA polymerase I promoter
GO:0050731	68	0.539736	0.674761	positive regulation of peptidyl-tyrosine phosphorylation
GO:0071277	28	0.540533	0.476237	cellular response to calcium ion
GO:0010942	26	0.54088	0.488127	positive regulation of cell death
GO:0045668	29	0.541269	0.649442	negative regulation of osteoblast differentiation
GO:0010951	55	0.545046	0.70276	negative regulation of endopeptidase activity
GO:0051924	27	0.547074	0.403074	regulation of calcium ion transport
GO:0046427	15	0.547949	0.784439	positive regulation of JAK-STAT cascade
GO:0007029	16	0.548043	0.719084	endoplasmic reticulum organization
GO:0002250	17	0.548476	0.317444	adaptive immune response
GO:0006833	37	0.550199	0.65196	water transport
GO:0016266	42	0.551592	0.598114	O-glycan processing
GO:0010212	41	0.552439	0.903731	response to ionizing radiation
GO:0042384	64	0.553802	0.448801	cilium assembly
GO:0048265	19	0.55388	0.573207	response to pain
GO:0035108	26	0.555714	0.394956	limb morphogenesis
GO:0050796	72	0.555752	0.483965	regulation of insulin secretion
GO:0031100	48	0.556637	0.423269	organ regeneration
GO:0006406	53	0.557517	0.427143	mRNA export from nucleus
GO:0007588	40	0.558094	0.539736	excretion
GO:0016056	27	0.558318	0.496569	rhodopsin mediated signaling pathway
GO:0051457	10	0.559889	0.409941	maintenance of protein location in nucleus
GO:0051301	84	0.560125	0.587342	cell division
GO:0006091	47	0.561646	0.659479	generation of precursor metabolites and energy
GO:0061025	21	0.563352	0.798874	membrane fusion
GO:0018146	26	0.563498	0.60637	keratan sulfate biosynthetic process
GO:0050850	15	0.565796	0.595108	positive regulation of calcium-mediated signaling
GO:0006369	42	0.566011	0.521193	termination of RNA polymerase II transcription
GO:0045880	17	0.570772	0.223412	positive regulation of smoothened signaling pathway
GO:0050909	31	0.570904	0.609048	sensory perception of taste
GO:0031124	39	0.571003	0.502966	mRNA 3-end processing
GO:0030449	20	0.572616	0.640606	regulation of complement activation
GO:0006027	23	0.573628	0.623343	glycosaminoglycan catabolic process
GO:0060042	12	0.57376	0.208692	retina morphogenesis in camera-type eye
GO:0002474	80	0.57419	0.479629	antigen processing and presentation of peptide antigen via MHC class I
GO:0006029	10	0.574228	0.67814	proteoglycan metabolic process
GO:0006919	78	0.574533	0.479064	activation of cysteine-type endopeptidase activity involved in apoptotic process
GO:0048146	45	0.576723	0.683221	positive regulation of fibroblast proliferation
GO:0001823	13	0.577907	0.708781	mesonephros development
GO:0051276	25	0.578374	0.427881	chromosome organization
GO:0051262	26	0.578615	0.475593	protein tetramerization
GO:0006361	23	0.578727	0.576401	transcription initiation from RNA polymerase I promoter
GO:0016358	29	0.57904	0.713936	dendrite development
GO:0034644	28	0.579338	0.72873	cellular response to UV
GO:0002089	12	0.579657	0.654568	lens morphogenesis in camera-type eye
GO:0046513	18	0.579672	0.562904	ceramide biosynthetic process
GO:0006874	76	0.579736	0.636578	cellular calcium ion homeostasis
GO:0006099	26	0.580614	0.526195	tricarboxylic acid cycle
GO:0006958	26	0.581408	0.608695	complement activation, classical pathway
GO:0001964	12	0.582456	0.460381	startle response
GO:0031295	50	0.58354	0.212124	T cell costimulation
GO:0007059	58	0.584022	0.393033	chromosome segregation
GO:0048646	21	0.589221	0.620326	anatomical structure formation involved in morphogenesis
GO:0032480	29	0.589862	0.590786	negative regulation of type I interferon production
GO:0010460	13	0.591672	0.483191	positive regulation of heart rate
GO:0051272	11	0.591787	0.550254	positive regulation of cellular component movement
GO:0048812	39	0.592277	0.725002	neuron projection morphogenesis
GO:0034599	23	0.592308	0.327989	cellular response to oxidative stress
GO:0060272	11	0.592778	0.744997	embryonic skeletal joint morphogenesis
GO:0043537	12	0.593146	0.588561	negative regulation of blood vessel endothelial cell migration
GO:0008277	38	0.593489	0.587377	regulation of G-protein coupled receptor protein signaling pathway
GO:0090179	12	0.593518	0.488186	planar cell polarity pathway involved in neural tube closure
GO:0001568	51	0.59456	0.72739	blood vessel development
GO:0001508	17	0.597303	0.838047	regulation of action potential
GO:0071397	13	0.597971	0.570068	cellular response to cholesterol
GO:0007190	27	0.599686	0.580552	activation of adenylate cyclase activity
GO:0043407	30	0.600281	0.713157	negative regulation of MAP kinase activity
GO:0048025	12	0.600812	0.96997	negative regulation of mRNA splicing, via spliceosome
GO:0031016	27	0.600995	0.66167	pancreas development
GO:0070830	32	0.601605	0.497594	tight junction assembly
GO:0006096	40	0.602141	0.645862	glycolysis
GO:0042312	11	0.602779	0.476944	regulation of vasodilation
GO:0034976	36	0.603294	0.748122	response to endoplasmic reticulum stress
GO:0050873	26	0.603357	0.391916	brown fat cell differentiation
GO:0042136	14	0.603773	0.700739	neurotransmitter biosynthetic process
GO:0021766	40	0.60514	0.562637	hippocampus development
GO:0006768	10	0.60608	0.69831	biotin metabolic process
GO:0071398	11	0.606715	0.723016	cellular response to fatty acid
GO:0030030	33	0.607876	0.654504	cell projection organization
GO:0043069	11	0.609208	0.65071	negative regulation of programmed cell death
GO:0046716	15	0.609769	0.658972	muscle cell cellular homeostasis
GO:0008015	36	0.610162	0.710325	blood circulation
GO:0006887	50	0.610474	0.488806	exocytosis
GO:0042311	20	0.610553	0.519785	vasodilation
GO:0043392	26	0.610902	0.562714	negative regulation of DNA binding
GO:0008209	15	0.61098	0.025122	androgen metabolic process
GO:0032740	10	0.611107	0.889884	positive regulation of interleukin-17 production
GO:0033344	22	0.611815	0.539883	cholesterol efflux
GO:0042274	11	0.612095	0.179395	ribosomal small subunit biogenesis
GO:0015758	59	0.612515	0.681958	glucose transport
GO:0016331	11	0.613023	0.818406	morphogenesis of embryonic epithelium
GO:0040007	38	0.613887	0.474513	growth
GO:0050770	26	0.614405	0.651318	regulation of axonogenesis
GO:0006855	11	0.615162	0.465477	drug transmembrane transport
GO:0050821	63	0.61527	0.703247	protein stabilization
GO:0045669	54	0.616355	0.296158	positive regulation of osteoblast differentiation
GO:2000134	17	0.616978	0.537603	negative regulation of G1/S transition of mitotic cell cycle
GO:0042130	22	0.617167	0.146552	negative regulation of T cell proliferation
GO:0038032	36	0.617197	0.749442	termination of G-protein coupled receptor signaling pathway
GO:0072593	28	0.61728	0.481342	reactive oxygen species metabolic process
GO:0060548	33	0.617302	0.527259	negative regulation of cell death
GO:0070371	17	0.617922	0.60987	ERK1 and ERK2 cascade
GO:0015721	17	0.619295	0.482898	bile acid and bile salt transport
GO:0016568	88	0.619634	0.668818	chromatin modification
GO:0000096	26	0.619973	0.764078	sulfur amino acid metabolic process
GO:0032024	37	0.62044	0.653209	positive regulation of insulin secretion
GO:0007088	14	0.621176	0.678936	regulation of mitosis
GO:0006936	91	0.621317	0.660086	muscle contraction
GO:0045909	25	0.621519	0.489583	positive regulation of vasodilation
GO:0071353	23	0.622463	0.830146	cellular response to interleukin-4
GO:2001241	13	0.622769	0.821158	positive regulation of extrinsic apoptotic signaling pathway in absence of ligand
GO:0008217	56	0.623922	0.685955	regulation of blood pressure
GO:0010506	18	0.62482	0.598145	regulation of autophagy
GO:0050772	17	0.625878	0.872945	positive regulation of axonogenesis
GO:0007154	80	0.626257	0.304636	cell communication
GO:0006766	83	0.626703	0.640251	vitamin metabolic process
GO:1902166	10	0.627322	0.44734	negative regulation of intrinsic apoptotic signaling pathway in response to DNA damage by p53 class mediator
GO:0000077	30	0.628421	0.741896	DNA damage checkpoint
GO:0048662	28	0.630183	0.77441	negative regulation of smooth muscle cell proliferation
GO:0060384	11	0.630479	0.788156	innervation
GO:0050775	12	0.630801	0.030399	positive regulation of dendrite morphogenesis
GO:0032760	32	0.631703	0.329251	positive regulation of tumor necrosis factor production
GO:0045332	12	0.632264	0.651612	phospholipid translocation
GO:0001658	41	0.632284	0.777641	branching involved in ureteric bud morphogenesis
GO:0051701	31	0.632824	0.353474	interaction with host
GO:0032793	12	0.633288	0.690256	positive regulation of CREB transcription factor activity
GO:0007528	25	0.633898	0.660696	neuromuscular junction development
GO:0034122	10	0.636406	0.367852	negative regulation of toll-like receptor signaling pathway
GO:0033628	11	0.638881	0.325713	regulation of cell adhesion mediated by integrin
GO:0090382	35	0.640215	0.362081	phagosome maturation
GO:0006471	12	0.640583	0.338832	protein ADP-ribosylation
GO:0006812	83	0.641011	0.603071	cation transport
GO:0050714	24	0.641202	0.242093	positive regulation of protein secretion
GO:0030162	34	0.641269	0.663785	regulation of proteolysis
GO:0048665	13	0.641283	0.545121	neuron fate specification
GO:0001837	30	0.64201	0.687557	epithelial to mesenchymal transition
GO:0010524	14	0.642135	0.563734	positive regulation of calcium ion transport into cytosol
GO:0002009	18	0.642323	0.421448	morphogenesis of an epithelium
GO:0043410	68	0.643041	0.658296	positive regulation of MAPK cascade
GO:0006821	48	0.64439	0.517419	chloride transport
GO:0021953	10	0.644442	0.763489	central nervous system neuron differentiation
GO:0006363	20	0.645535	0.632247	termination of RNA polymerase I transcription
GO:0048538	38	0.645536	0.547915	thymus development
GO:0042110	43	0.645618	0.299414	T cell activation
GO:0031146	14	0.645912	0.663939	SCF-dependent proteasomal ubiquitin-dependent protein catabolic process
GO:0045663	11	0.646151	0.898384	positive regulation of myoblast differentiation
GO:0007612	42	0.646548	0.723959	learning
GO:0022008	33	0.648747	0.604661	neurogenesis
GO:0032504	22	0.64954	0.740925	multicellular organism reproduction
GO:0009116	15	0.651378	0.685128	nucleoside metabolic process
GO:0032728	21	0.651576	0.706248	positive regulation of interferon-beta production
GO:0046488	21	0.65189	0.607811	phosphatidylinositol metabolic process
GO:0051918	10	0.652015	0.688364	negative regulation of fibrinolysis
GO:0019725	10	0.653026	0.486828	cellular homeostasis
GO:0008202	50	0.653452	0.480256	steroid metabolic process
GO:0007517	83	0.653727	0.656678	muscle organ development
GO:0051090	34	0.653797	0.629505	regulation of sequence-specific DNA binding transcription factor activity
GO:0010634	17	0.654476	0.703152	positive regulation of epithelial cell migration
GO:0070588	50	0.655512	0.459862	calcium ion transmembrane transport
GO:0033189	14	0.657076	0.861147	response to vitamin A
GO:0006415	76	0.657091	0.588221	translational termination
GO:0001706	15	0.657355	0.577028	endoderm formation
GO:0030225	12	0.658489	0.661509	macrophage differentiation
GO:0030833	12	0.66019	0.594294	regulation of actin filament polymerization
GO:0008045	20	0.660277	0.881169	motor neuron axon guidance
GO:0021510	19	0.660314	0.831487	spinal cord development
GO:0030968	76	0.661853	0.671049	endoplasmic reticulum unfolded protein response
GO:0007389	78	0.662318	0.719211	pattern specification process
GO:0043627	60	0.662571	0.521937	response to estrogen
GO:0008206	35	0.662745	0.350862	bile acid metabolic process
GO:0010862	26	0.663256	0.673482	positive regulation of pathway-restricted SMAD protein phosphorylation
GO:0001659	14	0.664145	0.134192	temperature homeostasis
GO:0006904	20	0.66431	0.580583	vesicle docking involved in exocytosis
GO:0060307	12	0.665023	0.589015	regulation of ventricular cardiac muscle cell membrane repolarization
GO:0006334	65	0.665249	0.673957	nucleosome assembly
GO:0008630	54	0.665442	0.585959	intrinsic apoptotic signaling pathway in response to DNA damage
GO:0006298	20	0.665603	0.496243	mismatch repair
GO:0009435	13	0.667019	0.859709	NAD biosynthetic process
GO:0042590	66	0.667891	0.684042	antigen processing and presentation of exogenous peptide antigen via MHC class I
GO:0007569	27	0.668905	0.69922	cell aging
GO:0050718	14	0.66891	0.351668	positive regulation of interleukin-1 beta secretion
GO:0007200	39	0.66901	0.401084	phospholipase C-activating G-protein coupled receptor signaling pathway
GO:0042220	23	0.669539	0.58005	response to cocaine
GO:0030195	11	0.669565	0.753144	negative regulation of blood coagulation
GO:0043588	40	0.669956	0.60494	skin development
GO:0006520	48	0.672208	0.572965	cellular amino acid metabolic process
GO:0035307	13	0.672445	0.48507	positive regulation of protein dephosphorylation
GO:0045078	10	0.673998	0.046041	positive regulation of interferon-gamma biosynthetic process
GO:0001819	18	0.674419	0.617094	positive regulation of cytokine production
GO:0071320	36	0.674446	0.590525	cellular response to cAMP
GO:0009651	14	0.674889	0.658618	response to salt stress
GO:0030501	27	0.675185	0.268197	positive regulation of bone mineralization
GO:0048873	19	0.676093	0.481133	homeostasis of number of cells within a tissue
GO:0003007	44	0.676271	0.649959	heart morphogenesis
GO:0006396	84	0.677731	0.604603	RNA processing
GO:0060674	11	0.677864	0.213546	placenta blood vessel development
GO:0097191	34	0.678137	0.691166	extrinsic apoptotic signaling pathway
GO:0030199	36	0.678516	0.663875	collagen fibril organization
GO:0006968	47	0.678628	0.707107	cellular defense response
GO:0051726	92	0.679772	0.717707	regulation of cell cycle
GO:0008361	12	0.680008	0.486859	regulation of cell size
GO:0010744	15	0.680232	0.549023	positive regulation of macrophage derived foam cell differentiation
GO:0016925	24	0.680257	0.588732	protein sumoylation
GO:0001539	17	0.681957	0.554316	ciliary or bacterial-type flagellar motility
GO:0009306	20	0.683137	0.700538	protein secretion
GO:0016579	24	0.683446	0.394534	protein deubiquitination
GO:0009653	96	0.683666	0.622463	anatomical structure morphogenesis
GO:0006778	19	0.684697	0.682956	porphyrin-containing compound metabolic process
GO:0001569	34	0.685273	0.838551	patterning of blood vessels
GO:0001947	46	0.685296	0.712148	heart looping
GO:0007010	95	0.68548	0.70994	cytoskeleton organization
GO:0051781	45	0.685492	0.527738	positive regulation of cell division
GO:0070373	24	0.685535	0.604654	negative regulation of ERK1 and ERK2 cascade
GO:0048167	33	0.686028	0.706306	regulation of synaptic plasticity
GO:0005513	13	0.686402	0.747885	detection of calcium ion
GO:0019886	68	0.686456	0.572062	antigen processing and presentation of exogenous peptide antigen via MHC class II
GO:0060322	11	0.686731	0.556594	head development
GO:0051216	68	0.687128	0.733891	cartilage development
GO:0001731	13	0.687481	0.850012	formation of translation preinitiation complex
GO:0060041	51	0.687926	0.69374	retina development in camera-type eye
GO:0006895	10	0.688853	0.534428	Golgi to endosome transport
GO:0007595	37	0.689058	0.85304	lactation
GO:0001933	38	0.689254	0.728702	negative regulation of protein phosphorylation
GO:0035094	26	0.689749	0.865058	response to nicotine
GO:0021707	10	0.689763	0.428182	cerebellar granule cell differentiation
GO:0043085	43	0.690063	0.582298	positive regulation of catalytic activity
GO:0071294	11	0.690778	0.44768	cellular response to zinc ion
GO:0045766	82	0.691182	0.68529	positive regulation of angiogenesis
GO:0071773	17	0.693368	0.687113	cellular response to BMP stimulus
GO:0000187	88	0.694603	0.644104	activation of MAPK activity
GO:0010629	80	0.694724	0.693052	negative regulation of gene expression
GO:0000724	46	0.696733	0.691836	double-strand break repair via homologous recombination
GO:0034374	11	0.697136	0.761158	low-density lipoprotein particle remodeling
GO:0042359	11	0.697306	0.599259	vitamin D metabolic process
GO:0048872	11	0.697762	0.786418	homeostasis of number of cells
GO:0001516	13	0.698257	0.804048	prostaglandin biosynthetic process
GO:0005978	15	0.698276	0.846822	glycogen biosynthetic process
GO:0018279	85	0.698342	0.64503	protein N-linked glycosylation via asparagine
GO:0070979	22	0.699514	0.902432	protein K11-linked ubiquitination
GO:0051928	23	0.700269	0.578617	positive regulation of calcium ion transport
GO:0016042	69	0.700674	0.771166	lipid catabolic process
GO:0006362	18	0.701147	0.661337	transcription elongation from RNA polymerase I promoter
GO:0071805	46	0.701315	0.556449	potassium ion transmembrane transport
GO:0002053	35	0.701616	0.882818	positive regulation of mesenchymal cell proliferation
GO:0006816	95	0.701717	0.635913	calcium ion transport
GO:0060349	22	0.70205	0.545662	bone morphogenesis
GO:0048593	17	0.702791	0.816592	camera-type eye morphogenesis
GO:0034968	15	0.702823	0.834147	histone lysine methylation
GO:0000723	44	0.702867	0.656494	telomere maintenance
GO:0007565	70	0.703596	0.674833	female pregnancy
GO:0016049	47	0.703948	0.645556	cell growth
GO:0048839	50	0.704264	0.619011	inner ear development
GO:0014823	31	0.704363	0.43605	response to activity
GO:0045765	26	0.704928	0.801871	regulation of angiogenesis
GO:0006987	59	0.70545	0.705615	activation of signaling protein activity involved in unfolded protein response
GO:0030041	15	0.706569	0.643417	actin filament polymerization
GO:0055072	20	0.706619	0.786156	iron ion homeostasis
GO:2000352	15	0.706787	0.77431	negative regulation of endothelial cell apoptotic process
GO:0035023	62	0.707106	0.710553	regulation of Rho protein signal transduction
GO:0060048	32	0.707612	0.444254	cardiac muscle contraction
GO:0006513	17	0.707724	0.468532	protein monoubiquitination
GO:0007271	16	0.708381	0.770136	synaptic transmission, cholinergic
GO:0046688	12	0.708911	0.914401	response to copper ion
GO:0021987	48	0.709123	0.718182	cerebral cortex development
GO:0048854	14	0.709808	0.485949	brain morphogenesis
GO:0035872	36	0.710016	0.450536	nucleotide-binding domain, leucine rich repeat containing receptor signaling pathway
GO:0018149	21	0.710162	0.533446	peptide cross-linking
GO:0050427	14	0.710498	0.911488	3-phosphoadenosine 5-phosphosulfate metabolic process
GO:0009791	76	0.710511	0.657254	post-embryonic development
GO:0010165	19	0.71116	0.699461	response to X-ray
GO:0070059	20	0.711169	0.845164	intrinsic apoptotic signaling pathway in response to endoplasmic reticulum stress
GO:0002076	18	0.711577	0.293261	osteoblast development
GO:0071480	13	0.711717	0.561693	cellular response to gamma radiation
GO:0030216	53	0.711861	0.532254	keratinocyte differentiation
GO:0010923	43	0.711893	0.651326	negative regulation of phosphatase activity
GO:0006139	56	0.712488	0.663105	nucleobase-containing compound metabolic process
GO:0033198	15	0.712627	0.66115	response to ATP
GO:0001541	38	0.712981	0.818126	ovarian follicle development
GO:0000718	20	0.713087	0.686318	nucleotide-excision repair, DNA damage removal
GO:0048821	13	0.713487	0.593566	erythrocyte development
GO:0001764	94	0.713649	0.711997	neuron migration
GO:0006654	29	0.713849	0.762097	phosphatidic acid biosynthetic process
GO:0030574	55	0.714452	0.647522	collagen catabolic process
GO:0042339	31	0.714523	0.622223	keratan sulfate metabolic process
GO:0007368	45	0.714679	0.823941	determination of left/right symmetry
GO:0032695	11	0.714847	0.911504	negative regulation of interleukin-12 production
GO:0019229	21	0.714998	0.763745	regulation of vasoconstriction
GO:0007169	77	0.715111	0.720117	transmembrane receptor protein tyrosine kinase signaling pathway
GO:0006006	98	0.715867	0.749603	glucose metabolic process
GO:0048675	12	0.716786	0.617628	axon extension
GO:0006486	94	0.717298	0.524627	protein glycosylation
GO:0007276	16	0.717504	0.464666	gamete generation
GO:0006401	17	0.717997	0.366092	RNA catabolic process
GO:0042573	17	0.718305	0.598762	retinoic acid metabolic process
GO:0008544	72	0.718843	0.68654	epidermis development
GO:0042462	12	0.719136	0.644788	eye photoreceptor cell development
GO:0046849	15	0.719695	0.858301	bone remodeling
GO:0048468	21	0.719789	0.793545	cell development
GO:0050896	41	0.720865	0.638162	response to stimulus
GO:0043401	46	0.721	0.691854	steroid hormone mediated signaling pathway
GO:0042475	58	0.721313	0.676104	odontogenesis of dentin-containing tooth
GO:0006182	12	0.721464	0.865736	cGMP biosynthetic process
GO:0030326	55	0.721522	0.620465	embryonic limb morphogenesis
GO:0007160	72	0.721905	0.670133	cell-matrix adhesion
GO:0000288	43	0.722462	0.757884	nuclear-transcribed mRNA catabolic process, deadenylation-dependent decay
GO:0048266	14	0.722998	0.843949	behavioral response to pain
GO:0007213	11	0.723167	0.954426	G-protein coupled acetylcholine receptor signaling pathway
GO:0051926	12	0.723276	0.780692	negative regulation of calcium ion transport
GO:0043281	14	0.723824	0.822156	regulation of cysteine-type endopeptidase activity involved in apoptotic process
GO:0016079	14	0.724716	0.496205	synaptic vesicle exocytosis
GO:0031116	10	0.724843	0.827383	positive regulation of microtubule polymerization
GO:2001234	18	0.724921	0.27264	negative regulation of apoptotic signaling pathway
GO:0030194	11	0.725019	0.927863	positive regulation of blood coagulation
GO:0006284	29	0.725123	0.630645	base-excision repair
GO:0097190	97	0.725773	0.672598	apoptotic signaling pathway
GO:0043029	22	0.726095	0.283807	T cell homeostasis
GO:0002027	24	0.7263	0.820507	regulation of heart rate
GO:0032727	11	0.72663	0.634676	positive regulation of interferon-alpha production
GO:0034134	62	0.726888	0.689779	toll-like receptor 2 signaling pathway
GO:0002052	17	0.72699	0.657434	positive regulation of neuroblast proliferation
GO:0071407	41	0.727352	0.648321	cellular response to organic cyclic compound
GO:0030282	31	0.727353	0.586304	bone mineralization
GO:0031663	26	0.727453	0.605722	lipopolysaccharide-mediated signaling pathway
GO:0030214	13	0.727488	0.801944	hyaluronan catabolic process
GO:0006271	27	0.727622	0.728789	DNA strand elongation involved in DNA replication
GO:0007005	39	0.727689	0.469492	mitochondrion organization
GO:0045454	51	0.728567	0.576688	cell redox homeostasis
GO:0016064	11	0.728642	0.953568	immunoglobulin mediated immune response
GO:0046685	11	0.729043	0.602856	response to arsenic-containing substance
GO:0005980	17	0.729186	0.646128	glycogen catabolic process
GO:0009416	17	0.729261	0.893962	response to light stimulus
GO:0042149	17	0.729885	0.475264	cellular response to glucose starvation
GO:0060333	43	0.730252	0.70446	interferon-gamma-mediated signaling pathway
GO:0009636	70	0.731609	0.443351	response to toxic substance
GO:0030324	95	0.731676	0.61403	lung development
GO:0006986	47	0.732865	0.786351	response to unfolded protein
GO:0071158	16	0.733113	0.668084	positive regulation of cell cycle arrest
GO:0032880	42	0.733388	0.714036	regulation of protein localization
GO:0032270	11	0.734264	0.899486	positive regulation of cellular protein metabolic process
GO:0007229	72	0.73437	0.750548	integrin-mediated signaling pathway
GO:0043433	49	0.734436	0.664366	negative regulation of sequence-specific DNA binding transcription factor activity
GO:0045995	12	0.734604	0.858776	regulation of embryonic development
GO:0002088	26	0.734635	0.856592	lens development in camera-type eye
GO:0007281	34	0.736105	0.752568	germ cell development
GO:0021915	34	0.736106	0.601353	neural tube development
GO:0043154	53	0.736188	0.704801	negative regulation of cysteine-type endopeptidase activity involved in apoptotic process
GO:0016339	25	0.736251	0.798725	calcium-dependent cell-cell adhesion
GO:0009950	11	0.736506	0.795241	dorsal/ventral axis specification
GO:0050921	10	0.736699	0.658024	positive regulation of chemotaxis
GO:0048485	18	0.737339	0.881127	sympathetic nervous system development
GO:0070509	11	0.737798	0.686734	calcium ion import
GO:0032259	20	0.737911	0.665886	methylation
GO:0010033	83	0.738205	0.679333	response to organic substance
GO:0009888	27	0.738273	0.76688	tissue development
GO:0043966	38	0.738357	0.869264	histone H3 acetylation
GO:0007188	38	0.738528	0.639699	adenylate cyclase-modulating G-protein coupled receptor signaling pathway
GO:0032886	10	0.738551	0.660597	regulation of microtubule-based process
GO:0008104	59	0.738754	0.73466	protein localization
GO:0006783	20	0.738924	0.627756	heme biosynthetic process
GO:0000132	15	0.739446	0.616235	establishment of mitotic spindle orientation
GO:0006891	15	0.739518	0.623044	intra-Golgi vesicle-mediated transport
GO:0051593	11	0.739567	0.738762	response to folic acid
GO:0051491	20	0.739571	0.805447	positive regulation of filopodium assembly
GO:0030111	14	0.739795	0.697224	regulation of Wnt signaling pathway
GO:0021794	12	0.740042	0.770264	thalamus development
GO:0032495	10	0.740171	0.305597	response to muramyl dipeptide
GO:0042776	14	0.74019	0.730617	mitochondrial ATP synthesis coupled proton transport
GO:0034341	16	0.740378	0.741465	response to interferon-gamma
GO:0055086	70	0.740446	0.633382	nucleobase-containing small molecule metabolic process
GO:0016310	31	0.740736	0.857602	phosphorylation
GO:0007286	51	0.74112	0.206638	spermatid development
GO:0017187	10	0.741476	0.839483	peptidyl-glutamic acid carboxylation
GO:0009725	59	0.741562	0.767315	response to hormone
GO:0042592	11	0.741717	0.87543	homeostatic process
GO:0032508	18	0.741872	0.702783	DNA duplex unwinding
GO:0070555	28	0.742118	0.652509	response to interleukin-1
GO:0034162	59	0.742439	0.694097	toll-like receptor 9 signaling pathway
GO:0034142	83	0.742649	0.564473	toll-like receptor 4 signaling pathway
GO:0032874	13	0.74275	0.429177	positive regulation of stress-activated MAPK cascade
GO:0005977	26	0.743586	0.767093	glycogen metabolic process
GO:0007292	16	0.74374	0.067387	female gamete generation
GO:0051403	46	0.744006	0.763474	stress-activated MAPK cascade
GO:0006310	88	0.744024	0.664708	DNA recombination
GO:0051865	27	0.744998	0.345481	protein autoubiquitination
GO:0007018	63	0.74518	0.677686	microtubule-based movement
GO:0033574	26	0.745639	0.625994	response to testosterone
GO:0001816	23	0.74648	0.55302	cytokine production
GO:0007603	79	0.746848	0.751871	phototransduction, visible light
GO:0050773	11	0.746879	0.690403	regulation of dendrite development
GO:0009103	45	0.747167	0.766832	lipopolysaccharide biosynthetic process
GO:0006978	12	0.747388	0.589502	DNA damage response, signal transduction by p53 class mediator resulting in transcription of p21 class mediator
GO:0071333	38	0.747421	0.744751	cellular response to glucose stimulus
GO:0009314	28	0.747445	0.638181	response to radiation
GO:0006521	46	0.747908	0.797492	regulation of cellular amino acid metabolic process
GO:0043330	19	0.748587	0.432629	response to exogenous dsRNA
GO:0032784	10	0.748687	0.744502	regulation of DNA-dependent transcription, elongation
GO:0007339	30	0.748947	0.695106	binding of sperm to zona pellucida
GO:0031122	12	0.749169	0.759793	cytoplasmic microtubule organization
GO:0051028	50	0.749187	0.7422	mRNA transport
GO:0031175	83	0.7492	0.673005	neuron projection development
GO:0022617	62	0.74925	0.682176	extracellular matrix disassembly
GO:0010976	53	0.74929	0.741877	positive regulation of neuron projection development
GO:0032355	72	0.750507	0.720147	response to estradiol
GO:0015991	28	0.750738	0.759069	ATP hydrolysis coupled proton transport
GO:0006801	15	0.750753	0.619869	superoxide metabolic process
GO:0032012	16	0.750778	0.535249	regulation of ARF protein signal transduction
GO:0019433	18	0.75083	0.266536	triglyceride catabolic process
GO:0002576	71	0.75148	0.612384	platelet degranulation
GO:0006749	27	0.752162	0.631803	glutathione metabolic process
GO:0051091	72	0.752291	0.717005	positive regulation of sequence-specific DNA binding transcription factor activity
GO:0030100	17	0.75252	0.811913	regulation of endocytosis
GO:0097193	52	0.753001	0.471093	intrinsic apoptotic signaling pathway
GO:0030317	29	0.753677	0.781021	sperm motility
GO:0008016	30	0.754341	0.642374	regulation of heart contraction
GO:0060412	20	0.754404	0.316892	ventricular septum morphogenesis
GO:0009967	11	0.75562	0.840122	positive regulation of signal transduction
GO:0007602	25	0.75584	0.772098	phototransduction
GO:0010575	18	0.756075	0.816965	positive regulation vascular endothelial growth factor production
GO:0000902	64	0.756532	0.561283	cell morphogenesis
GO:0007626	77	0.756589	0.704535	locomotory behavior
GO:0046827	10	0.757636	0.76963	positive regulation of protein export from nucleus
GO:0042391	65	0.757734	0.642836	regulation of membrane potential
GO:0031018	38	0.757734	0.756517	endocrine pancreas development
GO:0048699	18	0.757844	0.840959	generation of neurons
GO:0019933	20	0.757967	0.766777	cAMP-mediated signaling
GO:0032321	31	0.757976	0.839764	positive regulation of Rho GTPase activity
GO:0043087	12	0.75881	0.491528	regulation of GTPase activity
GO:0090303	11	0.759362	0.448738	positive regulation of wound healing
GO:0007218	71	0.759889	0.54057	neuropeptide signaling pathway
GO:0006112	89	0.760184	0.787429	energy reserve metabolic process
GO:0071456	79	0.760726	0.782327	cellular response to hypoxia
GO:0006195	10	0.761011	0.88707	purine nucleotide catabolic process
GO:0014911	14	0.761679	0.629046	positive regulation of smooth muscle cell migration
GO:0060338	17	0.761938	0.487479	regulation of type I interferon-mediated signaling pathway
GO:0060644	12	0.762271	0.888081	mammary gland epithelial cell differentiation
GO:0043523	25	0.762716	0.508337	regulation of neuron apoptotic process
GO:0042176	11	0.762828	0.832507	regulation of protein catabolic process
GO:0060444	13	0.763284	0.840055	branching involved in mammary gland duct morphogenesis
GO:0007020	11	0.764085	0.741421	microtubule nucleation
GO:0042755	20	0.76409	0.814845	eating behavior
GO:0034138	69	0.764117	0.64596	toll-like receptor 3 signaling pathway
GO:0001523	52	0.76468	0.783903	retinoid metabolic process
GO:0000245	18	0.764701	0.849466	spliceosomal complex assembly
GO:0010613	11	0.764818	0.805552	positive regulation of cardiac muscle hypertrophy
GO:0001975	27	0.765135	0.682103	response to amphetamine
GO:0070423	21	0.765612	0.651388	nucleotide-binding oligomerization domain containing signaling pathway
GO:0030178	43	0.766035	0.807464	negative regulation of Wnt signaling pathway
GO:0015914	20	0.766629	0.77235	phospholipid transport
GO:0040018	29	0.767309	0.816102	positive regulation of multicellular organism growth
GO:0006665	62	0.767514	0.783745	sphingolipid metabolic process
GO:0071222	69	0.767722	0.750145	cellular response to lipopolysaccharide
GO:0042787	43	0.768063	0.731948	protein ubiquitination involved in ubiquitin-dependent protein catabolic process
GO:0007586	52	0.768079	0.776497	digestion
GO:0042098	19	0.768631	0.556175	T cell proliferation
GO:0035666	67	0.768786	0.614717	TRIF-dependent toll-like receptor signaling pathway
GO:0060402	11	0.769091	0.6739	calcium ion transport into cytosol
GO:0045471	90	0.769293	0.700529	response to ethanol
GO:0030155	37	0.76953	0.793787	regulation of cell adhesion
GO:0002756	68	0.769616	0.621766	MyD88-independent toll-like receptor signaling pathway
GO:0032320	19	0.769891	0.602163	positive regulation of Ras GTPase activity
GO:0016337	100	0.769904	0.736285	cell-cell adhesion
GO:0006198	15	0.77008	0.783202	cAMP catabolic process
GO:0001755	29	0.770105	0.803465	neural crest cell migration
GO:0030318	21	0.770333	0.635709	melanocyte differentiation
GO:0010569	11	0.770819	0.818835	regulation of double-strand break repair via homologous recombination
GO:0042711	10	0.770825	0.559845	maternal behavior
GO:0001503	80	0.771344	0.665682	ossification
GO:0046718	12	0.771648	0.827886	viral entry into host cell
GO:0007265	67	0.77183	0.606375	Ras protein signal transduction
GO:0055093	11	0.772487	0.8345	response to hyperoxia
GO:0060216	14	0.772798	0.600713	definitive hemopoiesis
GO:0097194	27	0.772809	0.724897	execution phase of apoptosis
GO:0006869	59	0.773211	0.681989	lipid transport
GO:0045494	26	0.773371	0.693669	photoreceptor cell maintenance
GO:0000079	48	0.77351	0.721194	regulation of cyclin-dependent protein serine/threonine kinase activity
GO:0050872	10	0.773663	0.315151	white fat cell differentiation
GO:0000375	23	0.774188	0.541541	RNA splicing, via transesterification reactions
GO:0034504	26	0.774438	0.851053	protein localization to nucleus
GO:0051897	68	0.774605	0.765306	positive regulation of protein kinase B signaling
GO:0043552	23	0.774983	0.683938	positive regulation of phosphatidylinositol 3-kinase activity
GO:0070374	89	0.775191	0.58536	positive regulation of ERK1 and ERK2 cascade
GO:0045666	73	0.776082	0.750509	positive regulation of neuron differentiation
GO:0030097	74	0.776258	0.811047	hemopoiesis
GO:0031929	13	0.776307	0.819418	TOR signaling
GO:0042752	11	0.776584	0.721614	regulation of circadian rhythm
GO:0009267	27	0.776919	0.752252	cellular response to starvation
GO:0071310	30	0.777048	0.693276	cellular response to organic substance
GO:0019432	37	0.777054	0.61404	triglyceride biosynthetic process
GO:0055074	19	0.777102	0.729665	calcium ion homeostasis
GO:0018105	55	0.777237	0.756432	peptidyl-serine phosphorylation
GO:2001235	31	0.777239	0.816284	positive regulation of apoptotic signaling pathway
GO:0006865	32	0.778646	0.722545	amino acid transport
GO:0042307	15	0.778696	0.764864	positive regulation of protein import into nucleus
GO:0050771	18	0.77887	0.856851	negative regulation of axonogenesis
GO:0016485	38	0.778907	0.563982	protein processing
GO:0001938	57	0.77904	0.808973	positive regulation of endothelial cell proliferation
GO:0031047	26	0.780106	0.695501	gene silencing by RNA
GO:0001889	82	0.780822	0.538926	liver development
GO:0050877	10	0.781383	0.89416	neurological system process
GO:0050930	13	0.781693	0.859358	induction of positive chemotaxis
GO:0034097	60	0.781772	0.798934	response to cytokine
GO:0090190	17	0.781987	0.84038	positive regulation of branching involved in ureteric bud morphogenesis
GO:0009566	32	0.782141	0.791872	fertilization
GO:0045732	35	0.78226	0.47504	positive regulation of protein catabolic process
GO:0006024	31	0.782293	0.688886	glycosaminoglycan biosynthetic process
GO:0032007	17	0.782391	0.838595	negative regulation of TOR signaling
GO:0006890	22	0.783133	0.719609	retrograde vesicle-mediated transport, Golgi to ER
GO:0030101	13	0.783594	0.794255	natural killer cell activation
GO:0032855	18	0.783694	0.596812	positive regulation of Rac GTPase activity
GO:0035725	23	0.78373	0.459236	sodium ion transmembrane transport
GO:0051592	55	0.784771	0.64443	response to calcium ion
GO:0031397	22	0.784896	0.808436	negative regulation of protein ubiquitination
GO:0090263	47	0.785043	0.658828	positive regulation of canonical Wnt signaling pathway
GO:0016998	13	0.785285	0.636617	cell wall macromolecule catabolic process
GO:0032008	15	0.785408	0.770346	positive regulation of TOR signaling
GO:0030890	32	0.785476	0.615704	positive regulation of B cell proliferation
GO:0048566	18	0.786041	0.567237	embryonic digestive tract development
GO:0048260	13	0.786313	0.759581	positive regulation of receptor-mediated endocytosis
GO:0071479	23	0.786493	0.610606	cellular response to ionizing radiation
GO:0010811	31	0.787274	0.655943	positive regulation of cell-substrate adhesion
GO:0007274	15	0.78739	0.85366	neuromuscular synaptic transmission
GO:0007141	19	0.788281	0.632237	male meiosis I
GO:0030949	15	0.788366	0.754464	positive regulation of vascular endothelial growth factor receptor signaling pathway
GO:0007257	33	0.788693	0.695114	activation of JUN kinase activity
GO:0048715	10	0.78893	0.889863	negative regulation of oligodendrocyte differentiation
GO:0031667	36	0.789266	0.80257	response to nutrient levels
GO:0070536	10	0.789422	0.144515	protein K63-linked deubiquitination
GO:0003333	18	0.789557	0.616226	amino acid transmembrane transport
GO:0045907	23	0.789903	0.839904	positive regulation of vasoconstriction
GO:0019216	23	0.790077	0.857311	regulation of lipid metabolic process
GO:0042325	16	0.790475	0.825175	regulation of phosphorylation
GO:0009749	65	0.790604	0.646629	response to glucose
GO:0006814	94	0.790674	0.705535	sodium ion transport
GO:0019228	18	0.791338	0.654941	regulation of action potential in neuron
GO:0043200	29	0.791398	0.911276	response to amino acid
GO:0048705	37	0.792112	0.6039	skeletal system morphogenesis
GO:0001656	35	0.792199	0.801058	metanephros development
GO:0048589	29	0.792233	0.731438	developmental growth
GO:0046907	18	0.792453	0.672605	intracellular transport
GO:0051437	67	0.792565	0.799714	positive regulation of ubiquitin-protein ligase activity involved in mitotic cell cycle
GO:0051439	71	0.792663	0.715717	regulation of ubiquitin-protein ligase activity involved in mitotic cell cycle
GO:0071346	19	0.792928	0.712349	cellular response to interferon-gamma
GO:0022408	12	0.793002	0.90355	negative regulation of cell-cell adhesion
GO:0007628	35	0.793415	0.713026	adult walking behavior
GO:0042147	22	0.793525	0.731698	retrograde transport, endosome to Golgi
GO:0051402	31	0.793745	0.428096	neuron apoptotic process
GO:0043473	30	0.793802	0.794274	pigmentation
GO:0045060	11	0.793851	0.838878	negative thymic T cell selection
GO:0031145	76	0.793892	0.730161	anaphase-promoting complex-dependent proteasomal ubiquitin-dependent protein catabolic process
GO:0060429	10	0.79395	0.316636	epithelium development
GO:0071347	29	0.794123	0.747287	cellular response to interleukin-1
GO:0090090	77	0.794386	0.814029	negative regulation of canonical Wnt signaling pathway
GO:0006614	95	0.794519	0.844033	SRP-dependent cotranslational protein targeting to membrane
GO:0030838	31	0.794967	0.832383	positive regulation of actin filament polymerization
GO:0002062	34	0.79547	0.684675	chondrocyte differentiation
GO:0043010	49	0.795594	0.752356	camera-type eye development
GO:0045860	45	0.796423	0.800253	positive regulation of protein kinase activity
GO:0018108	72	0.796761	0.784235	peptidyl-tyrosine phosphorylation
GO:0006094	43	0.797371	0.789992	gluconeogenesis
GO:0048168	16	0.797758	0.787093	regulation of neuronal synaptic plasticity
GO:0051044	13	0.798299	0.595807	positive regulation of membrane protein ectodomain proteolysis
GO:0045648	20	0.798454	0.252759	positive regulation of erythrocyte differentiation
GO:0043547	49	0.798722	0.813042	positive regulation of GTPase activity
GO:0040015	11	0.798936	0.582599	negative regulation of multicellular organism growth
GO:0032757	18	0.799293	0.779592	positive regulation of interleukin-8 production
GO:0050853	26	0.799898	0.807547	B cell receptor signaling pathway
GO:0007254	48	0.799942	0.715486	JNK cascade
GO:0021522	17	0.800227	0.704607	spinal cord motor neuron differentiation
GO:0051084	34	0.800959	0.857498	de novo posttranslational protein folding
GO:0043086	30	0.801594	0.77832	negative regulation of catalytic activity
GO:0030512	59	0.801741	0.693082	negative regulation of transforming growth factor beta receptor signaling pathway
GO:0050434	42	0.801918	0.889255	positive regulation of viral transcription
GO:0032479	11	0.802317	0.798382	regulation of type I interferon production
GO:0001779	13	0.803197	0.650489	natural killer cell differentiation
GO:0002224	95	0.803213	0.637471	toll-like receptor signaling pathway
GO:0031668	15	0.803262	0.4537	cellular response to extracellular stimulus
GO:0008542	35	0.804124	0.691424	visual learning
GO:0007409	85	0.804254	0.774677	axonogenesis
GO:0006144	29	0.804808	0.862059	purine nucleobase metabolic process
GO:0042733	46	0.804838	0.712369	embryonic digit morphogenesis
GO:0033280	13	0.804992	0.644011	response to vitamin D
GO:0006754	21	0.805007	0.868164	ATP biosynthetic process
GO:0045651	11	0.805211	0.648553	positive regulation of macrophage differentiation
GO:0033138	42	0.806171	0.732658	positive regulation of peptidyl-serine phosphorylation
GO:0007030	36	0.806318	0.643004	Golgi organization
GO:0043409	14	0.806422	0.722026	negative regulation of MAPK cascade
GO:0006302	60	0.806565	0.754258	double-strand break repair
GO:0031424	37	0.806614	0.343239	keratinization
GO:0006536	13	0.807023	0.895373	glutamate metabolic process
GO:0007051	16	0.807056	0.52422	spindle organization
GO:0001894	16	0.807279	0.629305	tissue homeostasis
GO:0051602	15	0.8079	0.506074	response to electrical stimulus
GO:0097067	10	0.808184	0.765248	cellular response to thyroid hormone stimulus
GO:0006349	15	0.8082	0.727318	regulation of gene expression by genetic imprinting
GO:0070848	13	0.808431	0.852984	response to growth factor
GO:0006950	92	0.808778	0.813124	response to stress
GO:0060135	20	0.808896	0.853544	maternal process involved in female pregnancy
GO:0006364	79	0.809101	0.601353	rRNA processing
GO:0051436	62	0.809396	0.757066	negative regulation of ubiquitin-protein ligase activity involved in mitotic cell cycle
GO:0060081	10	0.809814	0.838008	membrane hyperpolarization
GO:0051289	50	0.810043	0.879276	protein homotetramerization
GO:0001822	99	0.81038	0.783172	kidney development
GO:0010827	31	0.810514	0.767293	regulation of glucose transport
GO:0007015	40	0.810521	0.741152	actin filament organization
GO:0022400	24	0.8111	0.650173	regulation of rhodopsin mediated signaling pathway
GO:0006338	60	0.81126	0.801574	chromatin remodeling
GO:0006378	22	0.811426	0.595055	mRNA polyadenylation
GO:0060441	15	0.811614	0.840674	epithelial tube branching involved in lung morphogenesis
GO:0048738	16	0.811784	0.684731	cardiac muscle tissue development
GO:0042157	38	0.812012	0.732959	lipoprotein metabolic process
GO:0040037	10	0.812197	0.88991	negative regulation of fibroblast growth factor receptor signaling pathway
GO:0018298	10	0.812218	0.812803	protein-chromophore linkage
GO:0048704	50	0.812276	0.752555	embryonic skeletal system morphogenesis
GO:0000188	23	0.812462	0.898147	inactivation of MAPK activity
GO:0015711	16	0.812732	0.697873	organic anion transport
GO:0030049	31	0.812878	0.728316	muscle filament sliding
GO:0007584	78	0.812961	0.659172	response to nutrient
GO:0033209	27	0.813021	0.797909	tumor necrosis factor-mediated signaling pathway
GO:0034146	55	0.813389	0.755952	toll-like receptor 5 signaling pathway
GO:0034166	55	0.813389	0.755952	toll-like receptor 10 signaling pathway
GO:0072659	32	0.813479	0.763627	protein localization to plasma membrane
GO:0030521	36	0.813597	0.801745	androgen receptor signaling pathway
GO:0016525	42	0.813649	0.739193	negative regulation of angiogenesis
GO:0007193	41	0.813717	0.843229	adenylate cyclase-inhibiting G-protein coupled receptor signaling pathway
GO:0048661	42	0.813887	0.615887	positive regulation of smooth muscle cell proliferation
GO:0031290	17	0.813891	0.892933	retinal ganglion cell axon guidance
GO:0032402	15	0.813897	0.572596	melanosome transport
GO:0010595	34	0.814023	0.687348	positive regulation of endothelial cell migration
GO:0000160	11	0.814224	0.437188	phosphorelay signal transduction system
GO:0030514	32	0.814329	0.859166	negative regulation of BMP signaling pathway
GO:0010952	10	0.814342	0.784901	positive regulation of peptidase activity
GO:0033540	10	0.814418	0.793035	fatty acid beta-oxidation using acyl-CoA oxidase
GO:0009411	42	0.814707	0.825696	response to UV
GO:0006368	61	0.815095	0.82768	transcription elongation from RNA polymerase II promoter
GO:0048745	14	0.815159	0.781657	smooth muscle tissue development
GO:0007215	12	0.815567	0.71921	glutamate receptor signaling pathway
GO:0009190	17	0.815827	0.915005	cyclic nucleotide biosynthetic process
GO:0051412	21	0.816124	0.75254	response to corticosterone
GO:0071108	14	0.816433	0.850659	protein K48-linked deubiquitination
GO:0051146	16	0.816484	0.920082	striated muscle cell differentiation
GO:0042100	11	0.81694	0.809365	B cell proliferation
GO:0007422	31	0.816951	0.814293	peripheral nervous system development
GO:0001937	23	0.817841	0.883274	negative regulation of endothelial cell proliferation
GO:0030509	57	0.819205	0.731666	BMP signaling pathway
GO:0008360	93	0.81925	0.789897	regulation of cell shape
GO:0050919	10	0.819387	0.675532	negative chemotaxis
GO:0035329	20	0.819475	0.800111	hippo signaling
GO:0045926	16	0.819502	0.19649	negative regulation of growth
GO:0016311	97	0.819705	0.746365	dephosphorylation
GO:0051899	22	0.819909	0.559498	membrane depolarization
GO:0045785	36	0.820501	0.766589	positive regulation of cell adhesion
GO:0051092	99	0.82084	0.74261	positive regulation of NF-kappaB transcription factor activity
GO:0051642	10	0.821034	0.732483	centrosome localization
GO:0006829	20	0.821529	0.76454	zinc ion transport
GO:0045216	56	0.821584	0.82586	cell-cell junction organization
GO:0042994	13	0.821674	0.830424	cytoplasmic sequestering of transcription factor
GO:0038123	60	0.821724	0.74897	toll-like receptor TLR1:TLR2 signaling pathway
GO:0038124	60	0.821724	0.74897	toll-like receptor TLR6:TLR2 signaling pathway
GO:0006888	44	0.822047	0.747765	ER to Golgi vesicle-mediated transport
GO:0050808	21	0.822167	0.820972	synapse organization
GO:0006590	11	0.822299	0.723843	thyroid hormone generation
GO:0048066	12	0.822558	0.623007	developmental pigmentation
GO:0015813	13	0.822668	0.950093	L-glutamate transport
GO:0007416	35	0.82317	0.808717	synapse assembly
GO:0018107	28	0.824445	0.760323	peptidyl-threonine phosphorylation
GO:0006200	77	0.824903	0.7026	ATP catabolic process
GO:0045786	43	0.825231	0.553823	negative regulation of cell cycle
GO:0030534	20	0.825663	0.817185	adult behavior
GO:0010259	16	0.825869	0.65852	multicellular organismal aging
GO:0006892	32	0.826587	0.902253	post-Golgi vesicle-mediated transport
GO:0009612	62	0.82703	0.779178	response to mechanical stimulus
GO:0050728	61	0.827188	0.708129	negative regulation of inflammatory response
GO:0001890	34	0.827278	0.690758	placenta development
GO:0042476	29	0.82733	0.7494	odontogenesis
GO:0007077	36	0.828217	0.81309	mitotic nuclear envelope disassembly
GO:0010332	28	0.828244	0.865495	response to gamma radiation
GO:0032465	11	0.828449	0.630605	regulation of cytokinesis
GO:0032956	31	0.828482	0.762679	regulation of actin cytoskeleton organization
GO:0008645	41	0.828761	0.770846	hexose transport
GO:2000811	14	0.829139	0.75882	negative regulation of anoikis
GO:0007566	34	0.829307	0.724309	embryo implantation
GO:0045746	20	0.829338	0.745517	negative regulation of Notch signaling pathway
GO:0000186	44	0.829381	0.789977	activation of MAPKK activity
GO:0030819	39	0.829855	0.727925	positive regulation of cAMP biosynthetic process
GO:0006487	23	0.82995	0.829829	protein N-linked glycosylation
GO:0042326	14	0.830148	0.870724	negative regulation of phosphorylation
GO:0001824	22	0.830561	0.706648	blastocyst development
GO:0006303	10	0.830594	0.504602	double-strand break repair via nonhomologous end joining
GO:0002755	69	0.830981	0.718544	MyD88-dependent toll-like receptor signaling pathway
GO:0017015	15	0.831057	0.809271	regulation of transforming growth factor beta receptor signaling pathway
GO:0006469	65	0.831767	0.766436	negative regulation of protein kinase activity
GO:0001570	57	0.832339	0.742286	vasculogenesis
GO:2001244	30	0.832885	0.571706	positive regulation of intrinsic apoptotic signaling pathway
GO:0007043	11	0.833043	0.871961	cell-cell junction assembly
GO:0051493	13	0.833181	0.793065	regulation of cytoskeleton organization
GO:0043406	40	0.833195	0.692245	positive regulation of MAP kinase activity
GO:0007168	10	0.834373	0.822198	receptor guanylyl cyclase signaling pathway
GO:0090314	12	0.834526	0.875838	positive regulation of protein targeting to membrane
GO:0006283	47	0.834677	0.813559	transcription-coupled nucleotide-excision repair
GO:0030177	23	0.8347	0.594181	positive regulation of Wnt signaling pathway
GO:0045429	27	0.835169	0.778272	positive regulation of nitric oxide biosynthetic process
GO:0006940	12	0.835369	0.952266	regulation of smooth muscle contraction
GO:0060314	13	0.835547	0.850999	regulation of ryanodine-sensitive calcium-release channel activity
GO:0006928	86	0.835583	0.721094	cellular component movement
GO:0006171	13	0.836369	0.842555	cAMP biosynthetic process
GO:0016573	23	0.83644	0.794219	histone acetylation
GO:0010288	13	0.836778	0.817537	response to lead ion
GO:0043161	64	0.83793	0.778043	proteasome-mediated ubiquitin-dependent protein catabolic process
GO:0006879	58	0.837945	0.538938	cellular iron ion homeostasis
GO:0001101	15	0.838244	0.496666	response to acid
GO:0007224	45	0.839384	0.805237	smoothened signaling pathway
GO:0030879	34	0.839464	0.767155	mammary gland development
GO:0071300	51	0.839641	0.804059	cellular response to retinoic acid
GO:0048666	48	0.839753	0.763255	neuron development
GO:0060347	15	0.839987	0.789951	heart trabecula formation
GO:0043434	55	0.840083	0.786264	response to peptide hormone
GO:0000165	65	0.840187	0.758113	MAPK cascade
GO:0006641	28	0.840754	0.731485	triglyceride metabolic process
GO:0031532	38	0.841056	0.673894	actin cytoskeleton reorganization
GO:0007017	29	0.841456	0.684113	microtubule-based process
GO:0060271	38	0.841603	0.702345	cilium morphogenesis
GO:0003151	38	0.841714	0.784821	outflow tract morphogenesis
GO:0071363	51	0.842045	0.799997	cellular response to growth factor stimulus
GO:0032981	13	0.842121	0.699358	mitochondrial respiratory chain complex I assembly
GO:0002437	10	0.842549	0.474631	inflammatory response to antigenic stimulus
GO:0032868	46	0.842809	0.753916	response to insulin
GO:0050766	23	0.843383	0.795989	positive regulation of phagocytosis
GO:0051000	13	0.843426	0.75786	positive regulation of nitric-oxide synthase activity
GO:0015684	15	0.843561	0.846447	ferrous iron transport
GO:0035335	51	0.844368	0.744131	peptidyl-tyrosine dephosphorylation
GO:0001662	18	0.844816	0.964505	behavioral fear response
GO:0006662	14	0.844978	0.789364	glycerol ether metabolic process
GO:0014898	11	0.845056	0.716475	cardiac muscle hypertrophy in response to stress
GO:0007016	12	0.845104	0.719509	cytoskeletal anchoring at plasma membrane
GO:0035690	48	0.845233	0.74747	cellular response to drug
GO:0072001	17	0.845401	0.891809	renal system development
GO:0001654	21	0.846196	0.762267	eye development
GO:0035050	17	0.84654	0.733663	embryonic heart tube development
GO:0006119	12	0.846985	0.252363	oxidative phosphorylation
GO:0035066	11	0.847108	0.66313	positive regulation of histone acetylation
GO:0071577	12	0.847471	0.832827	zinc ion transmembrane transport
GO:0032456	13	0.847485	0.493944	endocytic recycling
GO:0060173	24	0.847485	0.852117	limb development
GO:0006898	44	0.848156	0.786614	receptor-mediated endocytosis
GO:2000060	12	0.848169	0.796867	positive regulation of protein ubiquitination involved in ubiquitin-dependent protein catabolic process
GO:0043525	40	0.848385	0.850328	positive regulation of neuron apoptotic process
GO:0006921	42	0.848739	0.856063	cellular component disassembly involved in execution phase of apoptosis
GO:0008643	24	0.848792	0.552498	carbohydrate transport
GO:0006270	19	0.848811	0.860219	DNA replication initiation
GO:0006796	20	0.84917	0.774951	phosphate-containing compound metabolic process
GO:0030307	61	0.849248	0.806366	positive regulation of cell growth
GO:0071260	57	0.849388	0.872642	cellular response to mechanical stimulus
GO:0006289	69	0.849829	0.779744	nucleotide-excision repair
GO:0045931	23	0.849896	0.802751	positive regulation of mitotic cell cycle
GO:0002028	15	0.85012	0.676476	regulation of sodium ion transport
GO:0046902	11	0.850485	0.940185	regulation of mitochondrial membrane permeability
GO:0007026	10	0.850548	0.74289	negative regulation of microtubule depolymerization
GO:0033197	11	0.850713	0.889209	response to vitamin E
GO:0060397	20	0.850724	0.864663	JAK-STAT cascade involved in growth hormone signaling pathway
GO:0050790	21	0.851225	0.724138	regulation of catalytic activity
GO:0042632	57	0.851244	0.73216	cholesterol homeostasis
GO:2000678	10	0.851454	0.324154	negative regulation of transcription regulatory region DNA binding
GO:0030522	26	0.851647	0.889607	intracellular receptor signaling pathway
GO:0007623	50	0.852038	0.780382	circadian rhythm
GO:0060174	11	0.852465	0.85738	limb bud formation
GO:0006937	15	0.852531	0.950406	regulation of muscle contraction
GO:0006913	99	0.852635	0.779141	nucleocytoplasmic transport
GO:0050804	15	0.852767	0.886527	regulation of synaptic transmission
GO:0090103	20	0.853163	0.662385	cochlea morphogenesis
GO:0007413	13	0.853207	0.809183	axonal fasciculation
GO:0050729	45	0.853318	0.788174	positive regulation of inflammatory response
GO:0032314	14	0.853406	0.930141	regulation of Rac GTPase activity
GO:0002092	16	0.853893	0.460055	positive regulation of receptor internalization
GO:0033572	30	0.854034	0.572579	transferrin transport
GO:0007585	30	0.854804	0.587957	respiratory gaseous exchange
GO:0009953	44	0.855697	0.866932	dorsal/ventral pattern formation
GO:0007158	10	0.855726	0.923295	neuron cell-cell adhesion
GO:0045930	18	0.855895	0.84617	negative regulation of mitotic cell cycle
GO:0032753	10	0.85622	0.882808	positive regulation of interleukin-4 production
GO:0006605	38	0.856678	0.801786	protein targeting
GO:0043536	14	0.857308	0.884357	positive regulation of blood vessel endothelial cell migration
GO:0048545	29	0.857393	0.454921	response to steroid hormone
GO:0032786	10	0.857584	0.839281	positive regulation of DNA-dependent transcription, elongation
GO:0032094	12	0.858021	0.804942	response to food
GO:0032201	18	0.858534	0.739148	telomere maintenance via semi-conservative replication
GO:0002003	10	0.858727	0.805234	angiotensin maturation
GO:0048709	20	0.858822	0.819171	oligodendrocyte differentiation
GO:0034332	33	0.859014	0.813906	adherens junction organization
GO:0043046	13	0.859322	0.691361	DNA methylation involved in gamete generation
GO:0007625	12	0.859539	0.78751	grooming behavior
GO:0030099	20	0.859587	0.708159	myeloid cell differentiation
GO:0001974	31	0.859695	0.810274	blood vessel remodeling
GO:0042060	79	0.860066	0.766981	wound healing
GO:0060766	13	0.860141	0.820143	negative regulation of androgen receptor signaling pathway
GO:0043032	10	0.860293	0.83005	positive regulation of macrophage activation
GO:0060707	13	0.860298	0.643681	trophoblast giant cell differentiation
GO:0034613	42	0.860403	0.809243	cellular protein localization
GO:0010977	26	0.860726	0.767183	negative regulation of neuron projection development
GO:0031572	20	0.860767	0.81959	G2 DNA damage checkpoint
GO:0001578	19	0.861451	0.843713	microtubule bundle formation
GO:0051291	54	0.861625	0.885803	protein heterooligomerization
GO:0046209	21	0.861684	0.868757	nitric oxide metabolic process
GO:0008088	10	0.861756	0.850107	axon cargo transport
GO:0030010	16	0.861767	0.847894	establishment of cell polarity
GO:0072661	18	0.86224	0.846139	protein targeting to plasma membrane
GO:0006414	82	0.862466	0.525523	translational elongation
GO:0046330	53	0.862542	0.771198	positive regulation of JNK cascade
GO:0008203	65	0.862957	0.769663	cholesterol metabolic process
GO:0048286	31	0.863262	0.50942	lung alveolus development
GO:0006779	11	0.863405	0.890589	porphyrin-containing compound biosynthetic process
GO:0045921	12	0.863648	0.79833	positive regulation of exocytosis
GO:0021527	13	0.864445	0.530096	spinal cord association neuron differentiation
GO:0030048	15	0.864827	0.891468	actin filament-based movement
GO:0032147	23	0.864972	0.891428	activation of protein kinase activity
GO:0010225	10	0.865902	0.659359	response to UV-C
GO:0043542	19	0.86597	0.923244	endothelial cell migration
GO:0016050	11	0.866267	0.772064	vesicle organization
GO:0002479	63	0.866273	0.80697	antigen processing and presentation of exogenous peptide antigen via MHC class I, TAP-dependent
GO:0042594	29	0.866564	0.661829	response to starvation
GO:0042771	29	0.866744	0.799425	intrinsic apoptotic signaling pathway in response to DNA damage by p53 class mediator
GO:0006977	62	0.86688	0.742044	DNA damage response, signal transduction by p53 class mediator resulting in cell cycle arrest
GO:0043651	11	0.866902	0.381024	linoleic acid metabolic process
GO:0002548	14	0.866984	0.919588	monocyte chemotaxis
GO:0043388	22	0.867658	0.791543	positive regulation of DNA binding
GO:0001502	23	0.868071	0.853924	cartilage condensation
GO:0034612	23	0.868491	0.741753	response to tumor necrosis factor
GO:0048488	11	0.868845	0.89592	synaptic vesicle endocytosis
GO:0000910	51	0.869121	0.818818	cytokinesis
GO:0009966	25	0.870591	0.659613	regulation of signal transduction
GO:0051568	12	0.870949	0.617062	histone H3-K4 methylation
GO:0010243	29	0.871261	0.713877	response to organonitrogen compound
GO:0007163	19	0.871377	0.769468	establishment or maintenance of cell polarity
GO:0035914	45	0.871462	0.816213	skeletal muscle cell differentiation
GO:0019083	71	0.871612	0.778046	viral transcription
GO:0019233	48	0.872411	0.682554	sensory perception of pain
GO:0045662	11	0.872578	0.885912	negative regulation of myoblast differentiation
GO:0030334	53	0.872677	0.815439	regulation of cell migration
GO:0030224	15	0.872863	0.702982	monocyte differentiation
GO:0033598	10	0.87293	0.857806	mammary gland epithelial cell proliferation
GO:0070208	10	0.873296	0.822234	protein heterotrimerization
GO:0045109	11	0.873319	0.654003	intermediate filament organization
GO:0042953	14	0.874255	0.820636	lipoprotein transport
GO:0048535	12	0.874629	0.59132	lymph node development
GO:0070372	11	0.875589	0.916046	regulation of ERK1 and ERK2 cascade
GO:0050953	11	0.876066	0.838472	sensory perception of light stimulus
GO:0006744	10	0.876457	0.638197	ubiquinone biosynthetic process
GO:0048706	38	0.876837	0.816705	embryonic skeletal system development
GO:0045747	19	0.8772	0.835634	positive regulation of Notch signaling pathway
GO:0000722	22	0.877204	0.746488	telomere maintenance via recombination
GO:0009100	11	0.877307	0.699256	glycoprotein metabolic process
GO:0031293	11	0.877661	0.659814	membrane protein intracellular domain proteolysis
GO:0045664	23	0.877682	0.783529	regulation of neuron differentiation
GO:0045671	17	0.878079	0.493366	negative regulation of osteoclast differentiation
GO:0086004	11	0.878358	0.896439	regulation of cardiac muscle cell contraction
GO:0030520	15	0.878361	0.289162	intracellular estrogen receptor signaling pathway
GO:0086005	15	0.878693	0.661045	regulation of ventricular cardiac muscle cell action potential
GO:0033700	11	0.878788	0.788815	phospholipid efflux
GO:0009611	58	0.878881	0.76321	response to wounding
GO:0019369	46	0.879065	0.749363	arachidonic acid metabolic process
GO:0001843	61	0.879322	0.803148	neural tube closure
GO:0009312	14	0.879387	0.570484	oligosaccharide biosynthetic process
GO:0006446	34	0.879924	0.899877	regulation of translational initiation
GO:0042474	20	0.880232	0.703609	middle ear morphogenesis
GO:0042744	14	0.880357	0.812932	hydrogen peroxide catabolic process
GO:0030217	31	0.880376	0.760172	T cell differentiation
GO:0034199	16	0.88077	0.936996	activation of protein kinase A activity
GO:2001237	34	0.880908	0.904653	negative regulation of extrinsic apoptotic signaling pathway
GO:0002244	14	0.88162	0.671548	hematopoietic progenitor cell differentiation
GO:0006506	22	0.881935	0.557439	GPI anchor biosynthetic process
GO:0007159	23	0.882671	0.758785	leukocyte cell-cell adhesion
GO:0007613	47	0.882822	0.856953	memory
GO:0009451	15	0.882943	0.920834	RNA modification
GO:0007249	34	0.882955	0.878204	I-kappaB kinase/NF-kappaB signaling
GO:0050680	40	0.883765	0.88832	negative regulation of epithelial cell proliferation
GO:0007346	22	0.883799	0.848663	regulation of mitotic cell cycle
GO:0046580	20	0.8838	0.756789	negative regulation of Ras protein signal transduction
GO:0038096	62	0.88392	0.856132	Fc-gamma receptor signaling pathway involved in phagocytosis
GO:0035116	27	0.883982	0.680838	embryonic hindlimb morphogenesis
GO:0031032	11	0.884178	0.923367	actomyosin structure organization
GO:0030316	23	0.884308	0.785844	osteoclast differentiation
GO:0001522	17	0.884517	0.918484	pseudouridine synthesis
GO:0001782	14	0.884883	0.609489	B cell homeostasis
GO:0045780	13	0.885039	0.5531	positive regulation of bone resorption
GO:0006606	38	0.88537	0.863312	protein import into nucleus
GO:0030301	20	0.886139	0.789098	cholesterol transport
GO:0070207	11	0.886242	0.813963	protein homotrimerization
GO:0001958	23	0.886527	0.766446	endochondral ossification
GO:0045879	18	0.88672	0.869303	negative regulation of smoothened signaling pathway
GO:0045821	10	0.886835	0.965262	positive regulation of glycolysis
GO:0034329	66	0.887116	0.828062	cell junction assembly
GO:0043647	36	0.887373	0.808589	inositol phosphate metabolic process
GO:0022604	14	0.887449	0.937073	regulation of cell morphogenesis
GO:0030902	18	0.887525	0.405921	hindbrain development
GO:0030502	12	0.887574	0.944626	negative regulation of bone mineralization
GO:0050999	21	0.888014	0.914753	regulation of nitric-oxide synthase activity
GO:0050679	58	0.888087	0.904823	positive regulation of epithelial cell proliferation
GO:0006241	10	0.888721	0.772141	CTP biosynthetic process
GO:0008584	81	0.888755	0.810431	male gonad development
GO:0048013	28	0.88882	0.869166	ephrin receptor signaling pathway
GO:0007202	58	0.889263	0.89687	activation of phospholipase C activity
GO:0006417	63	0.889333	0.703266	regulation of translation
GO:0048384	15	0.890019	0.823446	retinoic acid receptor signaling pathway
GO:0050880	13	0.890086	0.910505	regulation of blood vessel size
GO:0045773	19	0.890405	0.8741	positive regulation of axon extension
GO:0001678	11	0.890601	0.895679	cellular glucose homeostasis
GO:0032436	31	0.890663	0.797952	positive regulation of proteasomal ubiquitin-dependent protein catabolic process
GO:0009058	61	0.890785	0.815493	biosynthetic process
GO:0042273	11	0.8909	0.653944	ribosomal large subunit biogenesis
GO:0060334	13	0.891048	0.530902	regulation of interferon-gamma-mediated signaling pathway
GO:0040008	50	0.891567	0.835742	regulation of growth
GO:0045778	15	0.891751	0.499296	positive regulation of ossification
GO:0045672	18	0.891763	0.760327	positive regulation of osteoclast differentiation
GO:0060716	17	0.892137	0.86414	labyrinthine layer blood vessel development
GO:0007405	16	0.892314	0.919928	neuroblast proliferation
GO:0010035	16	0.892418	0.826943	response to inorganic substance
GO:0060325	29	0.892472	0.760908	face morphogenesis
GO:0050767	14	0.892586	0.903527	regulation of neurogenesis
GO:0008333	23	0.892642	0.706986	endosome to lysosome transport
GO:0086091	19	0.892715	0.701302	regulation of heart rate by cardiac conduction
GO:0035019	35	0.892797	0.907867	somatic stem cell maintenance
GO:0032467	13	0.892798	0.900998	positive regulation of cytokinesis
GO:0042327	21	0.893069	0.593274	positive regulation of phosphorylation
GO:0002040	17	0.894008	0.858304	sprouting angiogenesis
GO:0001558	61	0.894534	0.766593	regulation of cell growth
GO:0051965	18	0.894553	0.90078	positive regulation of synapse assembly
GO:0009755	18	0.894624	0.824089	hormone-mediated signaling pathway
GO:0010881	15	0.895303	0.699691	regulation of cardiac muscle contraction by regulation of the release of sequestered calcium ion
GO:0008089	18	0.895346	0.914197	anterograde axon cargo transport
GO:0006661	47	0.895408	0.855945	phosphatidylinositol biosynthetic process
GO:0070542	12	0.89563	0.616925	response to fatty acid
GO:0032312	23	0.896048	0.772185	regulation of ARF GTPase activity
GO:0021549	31	0.896453	0.806851	cerebellum development
GO:0048387	14	0.896461	0.862891	negative regulation of retinoic acid receptor signaling pathway
GO:0008652	20	0.8969	0.907536	cellular amino acid biosynthetic process
GO:0000281	18	0.897488	0.86802	mitotic cytokinesis
GO:0046677	30	0.897646	0.859294	response to antibiotic
GO:0016197	48	0.897889	0.785162	endosomal transport
GO:0048856	11	0.898017	0.795519	anatomical structure development
GO:0043616	13	0.898478	0.859543	keratinocyte proliferation
GO:0019058	82	0.899066	0.841933	viral life cycle
GO:0007220	21	0.899133	0.757225	Notch receptor processing
GO:0006836	34	0.899271	0.691094	neurotransmitter transport
GO:0006691	14	0.899906	0.765857	leukotriene metabolic process
GO:0006611	21	0.899977	0.810731	protein export from nucleus
GO:0007611	42	0.900203	0.839371	learning or memory
GO:0042832	16	0.900407	0.869426	defense response to protozoan
GO:0043113	10	0.900532	0.901671	receptor clustering
GO:0006906	12	0.900962	0.844178	vesicle fusion
GO:0031529	13	0.901006	0.768805	ruffle organization
GO:0071392	16	0.901013	0.863553	cellular response to estradiol stimulus
GO:0015992	33	0.9013	0.722443	proton transport
GO:0006695	29	0.901344	0.756051	cholesterol biosynthetic process
GO:0006750	14	0.901509	0.711843	glutathione biosynthetic process
GO:0048008	25	0.901996	0.788	platelet-derived growth factor receptor signaling pathway
GO:0051384	75	0.902121	0.703035	response to glucocorticoid
GO:0042059	30	0.902646	0.794813	negative regulation of epidermal growth factor receptor signaling pathway
GO:0071356	51	0.902662	0.819011	cellular response to tumor necrosis factor
GO:0061077	12	0.902866	0.678041	chaperone-mediated protein folding
GO:0007398	16	0.903128	0.894433	ectoderm development
GO:0030279	17	0.90348	0.940842	negative regulation of ossification
GO:0006911	11	0.903772	0.84905	phagocytosis, engulfment
GO:2000145	10	0.903856	0.847174	regulation of cell motility
GO:0007266	38	0.903998	0.772807	Rho protein signal transduction
GO:0050910	14	0.904093	0.758576	detection of mechanical stimulus involved in sensory perception of sound
GO:0006909	33	0.90423	0.723484	phagocytosis
GO:0042692	32	0.904233	0.846419	muscle cell differentiation
GO:0051898	21	0.90472	0.855562	negative regulation of protein kinase B signaling
GO:0007140	17	0.904909	0.546066	male meiosis
GO:0003009	10	0.90539	0.680462	skeletal muscle contraction
GO:0070098	19	0.905484	0.933753	chemokine-mediated signaling pathway
GO:0097192	35	0.9058	0.913213	extrinsic apoptotic signaling pathway in absence of ligand
GO:0001946	10	0.905848	0.658965	lymphangiogenesis
GO:0042552	38	0.905871	0.856548	myelination
GO:0045840	27	0.90591	0.863757	positive regulation of mitosis
GO:0050673	12	0.905972	0.924941	epithelial cell proliferation
GO:0051149	27	0.906182	0.849626	positive regulation of muscle cell differentiation
GO:0034446	24	0.906368	0.833907	substrate adhesion-dependent cell spreading
GO:0030539	19	0.907138	0.736727	male genitalia development
GO:0032870	32	0.90768	0.667907	cellular response to hormone stimulus
GO:0045165	63	0.90782	0.769652	cell fate commitment
GO:0043488	13	0.908098	0.823515	regulation of mRNA stability
GO:0048208	12	0.90826	0.679916	COPII vesicle coating
GO:0016226	11	0.908366	0.716267	iron-sulfur cluster assembly
GO:0045727	36	0.909161	0.821763	positive regulation of translation
GO:0090398	18	0.90924	0.865611	cellular senescence
GO:0016601	11	0.909516	0.804417	Rac protein signal transduction
GO:0042119	10	0.909868	0.792795	neutrophil activation
GO:0001942	38	0.909904	0.869391	hair follicle development
GO:0010224	11	0.910441	0.911012	response to UV-B
GO:0022407	10	0.910613	0.89737	regulation of cell-cell adhesion
GO:0048617	11	0.910618	0.600405	embryonic foregut morphogenesis
GO:0055117	16	0.910745	0.777715	regulation of cardiac muscle contraction
GO:0031647	26	0.91084	0.833064	regulation of protein stability
GO:0010906	10	0.910854	0.954041	regulation of glucose metabolic process
GO:0051591	46	0.911636	0.802872	response to cAMP
GO:0071377	33	0.911655	0.901073	cellular response to glucagon stimulus
GO:0030032	24	0.912109	0.742353	lamellipodium assembly
GO:0007130	12	0.912394	0.716463	synaptonemal complex assembly
GO:0008272	13	0.91284	0.881785	sulfate transport
GO:0002407	13	0.91346	0.896576	dendritic cell chemotaxis
GO:0006541	14	0.91348	0.843732	glutamine metabolic process
GO:0048565	27	0.913755	0.867806	digestive tract development
GO:0014047	16	0.914372	0.911978	glutamate secretion
GO:0042574	12	0.914587	0.760931	retinal metabolic process
GO:0033147	10	0.914821	0.864726	negative regulation of intracellular estrogen receptor signaling pathway
GO:0050905	22	0.915439	0.56105	neuromuscular process
GO:0001892	25	0.915451	0.696489	embryonic placenta development
GO:0001649	50	0.915657	0.837019	osteoblast differentiation
GO:0030900	70	0.915769	0.779822	forebrain development
GO:0042246	15	0.9158	0.751553	tissue regeneration
GO:0050868	14	0.916399	0.933448	negative regulation of T cell activation
GO:0008154	11	0.916404	0.786923	actin polymerization or depolymerization
GO:0001708	20	0.916711	0.820917	cell fate specification
GO:0031954	11	0.917168	0.764166	positive regulation of protein autophosphorylation
GO:0030336	71	0.917332	0.823189	negative regulation of cell migration
GO:0045086	13	0.917488	0.444679	positive regulation of interleukin-2 biosynthetic process
GO:0050885	46	0.917513	0.869697	neuromuscular process controlling balance
GO:0060037	15	0.918488	0.518656	pharyngeal system development
GO:0000289	22	0.918554	0.876545	nuclear-transcribed mRNA poly(A) tail shortening
GO:0071902	17	0.918914	0.678112	positive regulation of protein serine/threonine kinase activity
GO:0006297	18	0.91935	0.812169	nucleotide-excision repair, DNA gap filling
GO:0006306	21	0.919824	0.920505	DNA methylation
GO:0060612	17	0.919919	0.748298	adipose tissue development
GO:0070301	34	0.920375	0.886752	cellular response to hydrogen peroxide
GO:0008585	24	0.920526	0.632324	female gonad development
GO:0050730	13	0.920614	0.754267	regulation of peptidyl-tyrosine phosphorylation
GO:0043568	10	0.921034	0.960569	positive regulation of insulin-like growth factor receptor signaling pathway
GO:0032570	30	0.92107	0.824541	response to progesterone
GO:0071230	36	0.921869	0.868162	cellular response to amino acid stimulus
GO:0050870	16	0.921974	0.676528	positive regulation of T cell activation
GO:0061178	10	0.922135	0.955999	regulation of insulin secretion involved in cellular response to glucose stimulus
GO:0007616	25	0.922605	0.71398	long-term memory
GO:0070528	10	0.922728	0.737663	protein kinase C signaling
GO:0010596	14	0.922757	0.884761	negative regulation of endothelial cell migration
GO:0009311	11	0.923221	0.625605	oligosaccharide metabolic process
GO:2000379	25	0.9234	0.831645	positive regulation of reactive oxygen species metabolic process
GO:0043691	18	0.923407	0.836412	reverse cholesterol transport
GO:0008637	21	0.924034	0.937339	apoptotic mitochondrial changes
GO:0043491	27	0.924226	0.904691	protein kinase B signaling
GO:0048741	13	0.92448	0.935784	skeletal muscle fiber development
GO:0001932	30	0.924521	0.914228	regulation of protein phosphorylation
GO:0007520	16	0.924923	0.705034	myoblast fusion
GO:0042472	64	0.924999	0.830351	inner ear morphogenesis
GO:0031581	12	0.925221	0.850908	hemidesmosome assembly
GO:0048010	20	0.925548	0.906282	vascular endothelial growth factor receptor signaling pathway
GO:0015939	10	0.925574	0.89139	pantothenate metabolic process
GO:0006693	11	0.925667	0.869309	prostaglandin metabolic process
GO:0031333	10	0.925964	0.747305	negative regulation of protein complex assembly
GO:0000045	27	0.927095	0.902821	autophagic vacuole assembly
GO:0036092	13	0.9272	0.859402	phosphatidylinositol-3-phosphate biosynthetic process
GO:0021904	16	0.927335	0.81068	dorsal/ventral neural tube patterning
GO:0007189	39	0.927469	0.805128	adenylate cyclase-activating G-protein coupled receptor signaling pathway
GO:0061418	26	0.927519	0.812977	regulation of transcription from RNA polymerase II promoter in response to hypoxia
GO:0006820	18	0.927561	0.764033	anion transport
GO:0060291	20	0.927646	0.923151	long-term synaptic potentiation
GO:0045740	35	0.928247	0.778103	positive regulation of DNA replication
GO:0043278	22	0.928972	0.922008	response to morphine
GO:0030001	18	0.929312	0.901895	metal ion transport
GO:0007600	11	0.929499	0.649552	sensory perception
GO:0032863	10	0.929523	0.888124	activation of Rac GTPase activity
GO:0007205	35	0.929798	0.840271	protein kinase C-activating G-protein coupled receptor signaling pathway
GO:0001756	42	0.930118	0.891886	somitogenesis
GO:0030593	35	0.930581	0.867754	neutrophil chemotaxis
GO:0019372	10	0.931486	0.543009	lipoxygenase pathway
GO:0050852	67	0.931512	0.708017	T cell receptor signaling pathway
GO:0006352	26	0.93174	0.951839	DNA-dependent transcription, initiation
GO:0048255	13	0.931758	0.911896	mRNA stabilization
GO:0043484	15	0.931846	0.437236	regulation of RNA splicing
GO:0030330	10	0.931979	0.813684	DNA damage response, signal transduction by p53 class mediator
GO:0072358	11	0.932053	0.61089	cardiovascular system development
GO:0000381	22	0.932294	0.940328	regulation of alternative mRNA splicing, via spliceosome
GO:0045070	14	0.932418	0.810824	positive regulation of viral genome replication
GO:0021954	14	0.932452	0.878716	central nervous system neuron development
GO:0006418	42	0.932627	0.785893	tRNA aminoacylation for protein translation
GO:0021854	10	0.932892	0.741517	hypothalamus development
GO:0034394	17	0.932918	0.766239	protein localization to cell surface
GO:0032332	17	0.933297	0.938644	positive regulation of chondrocyte differentiation
GO:0009954	24	0.933959	0.819351	proximal/distal pattern formation
GO:0030903	11	0.934368	0.835801	notochord development
GO:0033554	10	0.934626	0.898006	cellular response to stress
GO:0007492	29	0.935014	0.824867	endoderm development
GO:0006261	20	0.935085	0.72334	DNA-dependent DNA replication
GO:0045739	20	0.935151	0.920423	positive regulation of DNA repair
GO:0001963	11	0.935908	0.767942	synaptic transmission, dopaminergic
GO:0090129	11	0.936075	0.821293	positive regulation of synapse maturation
GO:0006493	24	0.936307	0.901061	protein O-linked glycosylation
GO:0035036	10	0.936971	0.927942	sperm-egg recognition
GO:0042789	11	0.937113	0.988668	mRNA transcription from RNA polymerase II promoter
GO:0010875	11	0.93729	0.908328	positive regulation of cholesterol efflux
GO:0002087	11	0.937325	0.934368	regulation of respiratory gaseous exchange by neurological system process
GO:0042542	41	0.937963	0.838008	response to hydrogen peroxide
GO:0043508	10	0.93818	0.808992	negative regulation of JUN kinase activity
GO:0010719	14	0.938211	0.839454	negative regulation of epithelial to mesenchymal transition
GO:0043039	13	0.939328	0.870859	tRNA aminoacylation
GO:0030511	18	0.940267	0.891729	positive regulation of transforming growth factor beta receptor signaling pathway
GO:0042491	12	0.94071	0.825739	auditory receptor cell differentiation
GO:0045954	13	0.940721	0.459525	positive regulation of natural killer cell mediated cytotoxicity
GO:0051693	13	0.940827	0.951235	actin filament capping
GO:0045807	11	0.941376	0.581943	positive regulation of endocytosis
GO:0045190	13	0.941602	0.730667	isotype switching
GO:0048041	15	0.941622	0.946208	focal adhesion assembly
GO:0006228	10	0.941752	0.817812	UTP biosynthetic process
GO:0007498	31	0.941949	0.661954	mesoderm development
GO:0032526	46	0.942247	0.759749	response to retinoic acid
GO:0008306	23	0.942296	0.90264	associative learning
GO:0060021	61	0.942429	0.904139	palate development
GO:0048863	25	0.942598	0.818072	stem cell differentiation
GO:0060068	11	0.942816	0.812004	vagina development
GO:0021983	28	0.943067	0.776886	pituitary gland development
GO:0030901	30	0.943117	0.913384	midbrain development
GO:0048599	10	0.943285	0.800968	oocyte development
GO:0006370	30	0.943378	0.968871	7-methylguanosine mRNA capping
GO:0008654	28	0.943416	0.860227	phospholipid biosynthetic process
GO:0048268	11	0.94473	0.954816	clathrin coat assembly
GO:0006826	16	0.944932	0.611822	iron ion transport
GO:0007032	22	0.945379	0.845296	endosome organization
GO:0060391	11	0.945882	0.921027	positive regulation of SMAD protein import into nucleus
GO:0007269	46	0.947051	0.783804	neurotransmitter secretion
GO:0045736	19	0.947483	0.817152	negative regulation of cyclin-dependent protein serine/threonine kinase activity
GO:2000311	14	0.947539	0.635875	regulation of alpha-amino-3-hydroxy-5-methyl-4-isoxazole propionate selective glutamate receptor activity
GO:0015804	11	0.947616	0.776143	neutral amino acid transport
GO:0033993	11	0.948193	0.584652	response to lipid
GO:0000083	19	0.948213	0.847779	regulation of transcription involved in G1/S transition of mitotic cell cycle
GO:0007004	10	0.948827	0.824171	telomere maintenance via telomerase
GO:2000463	10	0.949034	0.815096	positive regulation of excitatory postsynaptic membrane potential
GO:0035924	18	0.949293	0.794804	cellular response to vascular endothelial growth factor stimulus
GO:0006071	13	0.949766	0.797727	glycerol metabolic process
GO:0006807	20	0.949951	0.844124	nitrogen compound metabolic process
GO:0030278	10	0.950296	0.913458	regulation of ossification
GO:0035413	11	0.950521	0.736606	positive regulation of catenin import into nucleus
GO:0006607	12	0.950534	0.805212	NLS-bearing protein import into nucleus
GO:0032148	17	0.950916	0.919671	activation of protein kinase B activity
GO:0010745	13	0.951067	0.898135	negative regulation of macrophage derived foam cell differentiation
GO:0014065	21	0.951274	0.886345	phosphatidylinositol 3-kinase signaling
GO:0043011	14	0.951352	0.843556	myeloid dendritic cell differentiation
GO:0015949	17	0.951758	0.843273	nucleobase-containing small molecule interconversion
GO:0045022	12	0.951796	0.83732	early endosome to late endosome transport
GO:0006337	16	0.952159	0.941799	nucleosome disassembly
GO:0019827	46	0.952717	0.85604	stem cell maintenance
GO:0032922	14	0.952739	0.942537	circadian regulation of gene expression
GO:0017157	16	0.952745	0.704731	regulation of exocytosis
GO:0035909	13	0.952776	0.868483	aorta morphogenesis
GO:0010765	16	0.952931	0.960278	positive regulation of sodium ion transport
GO:0048568	22	0.953039	0.954226	embryonic organ development
GO:0048701	24	0.953473	0.767986	embryonic cranial skeleton morphogenesis
GO:0034375	14	0.953635	0.914961	high-density lipoprotein particle remodeling
GO:0046627	19	0.953642	0.826667	negative regulation of insulin receptor signaling pathway
GO:0008610	13	0.953693	0.670526	lipid biosynthetic process
GO:0001954	16	0.953794	0.903956	positive regulation of cell-matrix adhesion
GO:0016486	18	0.953856	0.64221	peptide hormone processing
GO:0010842	11	0.954499	0.75589	retina layer formation
GO:0071364	17	0.955167	0.826482	cellular response to epidermal growth factor stimulus
GO:0006625	10	0.955379	0.926768	protein targeting to peroxisome
GO:0019953	10	0.955633	0.718525	sexual reproduction
GO:0032968	11	0.956267	0.964163	positive regulation of transcription elongation from RNA polymerase II promoter
GO:0051017	21	0.95631	0.862713	actin filament bundle assembly
GO:0032026	10	0.956314	0.920679	response to magnesium ion
GO:0014912	11	0.956779	0.957773	negative regulation of smooth muscle cell migration
GO:0043129	10	0.957152	0.562403	surfactant homeostasis
GO:0010039	11	0.957313	0.820778	response to iron ion
GO:0060389	13	0.958055	0.892872	pathway-restricted SMAD protein phosphorylation
GO:0032438	13	0.95841	0.924853	melanosome organization
GO:0050912	10	0.958433	0.835983	detection of chemical stimulus involved in sensory perception of taste
GO:0070527	18	0.958554	0.765501	platelet aggregation
GO:0030148	30	0.958631	0.898145	sphingolipid biosynthetic process
GO:0030262	11	0.958654	0.623722	apoptotic nuclear changes
GO:0048813	20	0.958752	0.933508	dendrite morphogenesis
GO:1902043	16	0.959643	0.799898	positive regulation of extrinsic apoptotic signaling pathway via death domain receptors
GO:0043277	12	0.959728	0.855174	apoptotic cell clearance
GO:0000070	17	0.959805	0.788073	mitotic sister chromatid segregation
GO:0045184	13	0.959868	0.90324	establishment of protein localization
GO:0046326	25	0.960459	0.953547	positive regulation of glucose import
GO:0055015	10	0.961155	0.974231	ventricular cardiac muscle cell development
GO:0048703	10	0.961181	0.979266	embryonic viscerocranium morphogenesis
GO:0043001	16	0.961218	0.738442	Golgi to plasma membrane protein transport
GO:0030220	11	0.961312	0.931844	platelet formation
GO:0035265	13	0.962031	0.91866	organ growth
GO:0019371	14	0.962857	0.744471	cyclooxygenase pathway
GO:0030517	10	0.962994	0.96514	negative regulation of axon extension
GO:0007031	18	0.963021	0.752692	peroxisome organization
GO:0055088	20	0.963384	0.839963	lipid homeostasis
GO:0045787	24	0.963463	0.963725	positive regulation of cell cycle
GO:0035162	19	0.963726	0.811204	embryonic hemopoiesis
GO:0044344	19	0.963789	0.619622	cellular response to fibroblast growth factor stimulus
GO:0043408	14	0.964478	0.960954	regulation of MAPK cascade
GO:0033327	11	0.96449	0.73029	Leydig cell differentiation
GO:0010812	12	0.964691	0.952749	negative regulation of cell-substrate adhesion
GO:0006996	12	0.965096	0.806268	organelle organization
GO:0045667	11	0.965355	0.904281	regulation of osteoblast differentiation
GO:0050769	19	0.965416	0.948619	positive regulation of neurogenesis
GO:0045725	13	0.965873	0.943493	positive regulation of glycogen biosynthetic process
GO:0009168	12	0.966005	0.903797	purine ribonucleoside monophosphate biosynthetic process
GO:0051967	10	0.966264	0.931421	negative regulation of synaptic transmission, glutamatergic
GO:0046854	17	0.966756	0.95316	phosphatidylinositol phosphorylation
GO:0010718	20	0.96703	0.929358	positive regulation of epithelial to mesenchymal transition
GO:0090102	12	0.967242	0.971718	cochlea development
GO:0048546	16	0.96727	0.900434	digestive tract morphogenesis
GO:0050690	22	0.967291	0.707328	regulation of defense response to virus by virus
GO:0019226	16	0.967479	0.960817	transmission of nerve impulse
GO:0006626	42	0.967551	0.947445	protein targeting to mitochondrion
GO:0045599	31	0.96757	0.883304	negative regulation of fat cell differentiation
GO:0016024	11	0.967652	0.908322	CDP-diacylglycerol biosynthetic process
GO:0045445	16	0.967855	0.893723	myoblast differentiation
GO:0009083	16	0.967863	0.92086	branched-chain amino acid catabolic process
GO:0001556	14	0.967877	0.964961	oocyte maturation
GO:0003215	10	0.967915	0.580919	cardiac right ventricle morphogenesis
GO:1902042	18	0.968426	0.904928	negative regulation of extrinsic apoptotic signaling pathway via death domain receptors
GO:0031334	11	0.968554	0.888805	positive regulation of protein complex assembly
GO:0046686	23	0.96899	0.802025	response to cadmium ion
GO:0071257	11	0.969093	0.844916	cellular response to electrical stimulus
GO:0015012	14	0.969499	0.689922	heparan sulfate proteoglycan biosynthetic process
GO:0035115	31	0.969617	0.850527	embryonic forelimb morphogenesis
GO:0046847	16	0.969974	0.845181	filopodium assembly
GO:0060749	14	0.970002	0.955779	mammary gland alveolus development
GO:0015986	15	0.970274	0.961396	ATP synthesis coupled proton transport
GO:0042346	16	0.970578	0.938766	positive regulation of NF-kappaB import into nucleus
GO:0001709	16	0.970726	0.943633	cell fate determination
GO:0060071	12	0.970836	0.750905	Wnt signaling pathway, planar cell polarity pathway
GO:0050777	10	0.970872	0.945523	negative regulation of immune response
GO:0030818	13	0.970886	0.956468	negative regulation of cAMP biosynthetic process
GO:0048870	13	0.971335	0.903146	cell motility
GO:0016239	10	0.971479	0.967869	positive regulation of macroautophagy
GO:0007214	16	0.971545	0.834587	gamma-aminobutyric acid signaling pathway
GO:0046856	11	0.971872	0.859953	phosphatidylinositol dephosphorylation
GO:0045582	14	0.971949	0.939806	positive regulation of T cell differentiation
GO:0023014	12	0.972889	0.948929	signal transduction by phosphorylation
GO:0046697	17	0.972905	0.867965	decidualization
GO:0006970	15	0.973814	0.968277	response to osmotic stress
GO:0043403	10	0.974006	0.967638	skeletal muscle tissue regeneration
GO:0008299	13	0.974427	0.611408	isoprenoid biosynthetic process
GO:0040014	26	0.974677	0.911312	regulation of multicellular organism growth
GO:0032743	10	0.974747	0.856905	positive regulation of interleukin-2 production
GO:0009165	10	0.974804	0.746327	nucleotide biosynthetic process
GO:0070306	10	0.975855	0.742047	lens fiber cell differentiation
GO:0071560	29	0.975981	0.959267	cellular response to transforming growth factor beta stimulus
GO:0006672	18	0.976072	0.893707	ceramide metabolic process
GO:0014075	12	0.976219	0.862315	response to amine
GO:0050806	13	0.976365	0.904952	positive regulation of synaptic transmission
GO:0045987	15	0.976949	0.90282	positive regulation of smooth muscle contraction
GO:0016558	11	0.977703	0.710026	protein import into peroxisome matrix
GO:0060065	11	0.977856	0.897544	uterus development
GO:0043507	30	0.977873	0.922755	positive regulation of JUN kinase activity
GO:0043923	11	0.977983	0.89818	positive regulation by host of viral transcription
GO:1902230	12	0.978858	0.914367	negative regulation of intrinsic apoptotic signaling pathway in response to DNA damage
GO:0006098	12	0.979679	0.8462	pentose-phosphate shunt
GO:0031571	10	0.980472	0.861656	mitotic G1 DNA damage checkpoint
GO:2000649	10	0.980661	0.878603	regulation of sodium ion transmembrane transporter activity
GO:0001655	14	0.981259	0.978191	urogenital system development
GO:0060292	11	0.98128	0.943175	long term synaptic depression
GO:0042340	11	0.981394	0.902656	keratan sulfate catabolic process
GO:0008354	11	0.981886	0.887529	germ cell migration
GO:0001836	24	0.982361	0.836002	release of cytochrome c from mitochondria
GO:0010390	10	0.982436	0.936073	histone monoubiquitination
GO:0071542	12	0.98251	0.902806	dopaminergic neuron differentiation
GO:0019082	10	0.98461	0.944696	viral protein processing
GO:0019068	11	0.98461	0.944696	virion assembly
GO:2000378	10	0.9847	0.978271	negative regulation of reactive oxygen species metabolic process
GO:0051968	15	0.984875	0.92108	positive regulation of synaptic transmission, glutamatergic
GO:0035025	10	0.985013	0.888383	positive regulation of Rho protein signal transduction
GO:0048469	34	0.985023	0.910713	cell maturation
GO:0086002	10	0.985464	0.97315	regulation of cardiac muscle cell action potential involved in contraction
GO:0008631	14	0.985785	0.956793	intrinsic apoptotic signaling pathway in response to oxidative stress
GO:0007194	24	0.986179	0.959151	negative regulation of adenylate cyclase activity
GO:0014902	10	0.98636	0.718286	myotube differentiation
GO:0010226	10	0.986469	0.98823	response to lithium ion
GO:0045598	10	0.98681	0.959257	regulation of fat cell differentiation
GO:0045453	20	0.986871	0.885222	bone resorption
GO:0097503	11	0.987336	0.952815	sialylation
GO:0043267	11	0.98909	0.95915	negative regulation of potassium ion transport
GO:0045670	10	0.991246	0.883781	regulation of osteoclast differentiation
GO:0046887	12	0.991503	0.954896	positive regulation of hormone secretion
GO:0000302	12	0.991722	0.969428	response to reactive oxygen species
GO:0003148	10	0.991817	0.589807	outflow tract septum morphogenesis
GO:0045638	16	0.9922	0.987649	negative regulation of myeloid cell differentiation

## Sheet: Supplemental Table S3
KEGG
KEGG ID	Number of genes	f_EA	f_AA	Description
hsa00053	14	-0.892053	-0.942847	Ascorbate and aldarate metabolism
hsa00410	15	-0.674103	-0.909468	beta-Alanine metabolism
hsa00563	14	-0.721311	-0.826294	Glycosylphosphatidylinositol(GPI)-anchor biosynthesis
hsa00120	13	0.060596	-0.469499	Primary bile acid biosynthesis
hsa01040	17	-0.251748	-0.457902	Biosynthesis of unsaturated fatty acids
hsa05310	17	-0.93036	-0.280042	Asthma
hsa05332	19	-0.639647	-0.241725	Graft-versus-host disease
hsa00140	34	-0.703011	-0.23843	Steroid hormone biosynthesis
hsa00250	22	0.797533	-0.096245	Alanine, aspartate and glutamate metabolism
hsa00910	21	0.251942	-0.076973	Nitrogen metabolism
hsa00260	25	-0.439956	-0.037955	Glycine, serine and threonine metabolism
hsa00340	20	0.537483	-0.022349	Histidine metabolism
hsa00380	30	-0.18171	0.015707	Tryptophan metabolism
hsa03440	18	0.362608	0.032663	Homologous recombination
hsa00280	33	0.08482	0.041587	Valine, leucine and isoleucine degradation
hsa05330	18	-0.361961	0.045303	Allograft rejection
hsa04130	26	0.536248	0.113577	SNARE interactions in vesicular transport
hsa04621	40	-0.397021	0.130406	NOD-like receptor signaling pathway
hsa00640	24	-0.664099	0.135817	Propanoate metabolism
hsa04612	44	0.440441	0.146104	Antigen processing and presentation
hsa00650	25	0.686448	0.180901	Butanoate metabolism
hsa04620	66	0.593992	0.258107	Toll-like receptor signaling pathway
hsa04966	20	0.453048	0.260913	Collecting duct acid secretion
hsa03320	54	0.383854	0.27761	PPAR signaling pathway
hsa00071	32	-0.13998	0.299145	Fatty acid metabolism
hsa04622	46	0.306055	0.306127	RIG-I-like receptor signaling pathway
hsa04142	80	0.503948	0.311101	Lysosome
hsa04940	22	0.541326	0.321933	Type I diabetes mellitus
hsa00860	26	0.443236	0.33204	Porphyrin and chlorophyll metabolism
hsa00630	10	0.73748	0.347145	Glyoxylate and dicarboxylate metabolism
hsa00620	30	0.132831	0.355024	Pyruvate metabolism
hsa00360	14	0.77568	0.360926	Phenylalanine metabolism
hsa00511	10	-0.910027	0.372861	Other glycan degradation
hsa04742	36	0.557021	0.433967	Taste transduction
hsa00531	15	0.512606	0.434995	Glycosaminoglycan degradation
hsa00330	36	0.478083	0.437849	Arginine and proline metabolism
hsa04623	34	0.469749	0.438058	Cytosolic DNA-sensing pathway
hsa03430	18	0.674858	0.445275	Mismatch repair
hsa04672	28	0.81481	0.464555	Intestinal immune network for IgA production
hsa00190	79	0.6759	0.471095	Oxidative phosphorylation
hsa00532	19	0.862737	0.491744	Glycosaminoglycan biosynthesis - chondroitin sulfate
hsa00830	39	0.410098	0.494058	Retinol metabolism
hsa02010	35	0.565263	0.499757	ABC transporters
hsa05322	55	0.644265	0.503209	Systemic lupus erythematosus
hsa00900	13	0.954228	0.507717	Terpenoid backbone biosynthesis
hsa04662	46	0.643093	0.509335	B cell receptor signaling pathway
hsa00770	11	0.038759	0.523365	Pantothenate and CoA biosynthesis
hsa00982	41	0.631652	0.52533	Drug metabolism - cytochrome P450
hsa05120	40	0.81298	0.526258	Epithelial cell signaling in Helicobacter pylori infection
hsa05020	24	0.40326	0.528921	Prion diseases
hsa00740	13	-0.912973	0.541033	Riboflavin metabolism
hsa00980	40	0.72384	0.560231	Metabolism of xenobiotics by cytochrome P450
hsa04320	20	0.875429	0.564481	Dorso-ventral axis formation
hsa00510	30	0.662302	0.573947	N-Glycan biosynthesis
hsa05320	25	0.744998	0.587615	Autoimmune thyroid disease
hsa00983	31	0.599168	0.597979	Drug metabolism - other enzymes
hsa00010	44	0.619492	0.599852	Glycolysis / Gluconeogenesis
hsa04146	66	0.680015	0.601627	Peroxisome
hsa04330	39	0.700721	0.608365	Notch signaling pathway
hsa00020	24	0.489356	0.609099	Citrate cycle (TCA cycle)
hsa04610	49	0.663441	0.609339	Complement and coagulation cascades
hsa05131	34	0.740342	0.610848	Shigellosis
hsa00590	41	0.605801	0.61278	Arachidonic acid metabolism
hsa00534	23	0.963273	0.614657	Glycosaminoglycan biosynthesis - heparan sulfate
hsa04514	80	0.663468	0.632022	Cell adhesion molecules (CAMs)
hsa00350	29	0.771058	0.644057	Tyrosine metabolism
hsa04260	43	0.635719	0.651206	Cardiac muscle contraction
hsa04744	17	0.745621	0.651733	Phototransduction
hsa00052	18	0.697729	0.6556	Galactose metabolism
hsa00310	36	0.544679	0.664653	Lysine degradation
hsa00520	29	0.67791	0.668053	Amino sugar and nucleotide sugar metabolism
hsa04340	43	0.539704	0.670631	Hedgehog signaling pathway
hsa00040	17	0.86729	0.688847	Pentose and glucuronate interconversions
hsa03410	25	0.841247	0.692084	Base excision repair
hsa00270	30	0.511861	0.694233	Cysteine and methionine metabolism
hsa05012	75	0.683443	0.696501	Parkinsons disease
hsa05014	38	0.725221	0.698314	Amyotrophic lateral sclerosis (ALS)
hsa04650	81	0.752056	0.70017	Natural killer cell mediated cytotoxicity
hsa04360	79	0.669061	0.701543	Axon guidance
hsa04960	29	0.80528	0.702238	Aldosterone-regulated sodium reabsorption
hsa05217	48	0.519247	0.703731	Basal cell carcinoma
hsa04120	82	0.738872	0.704284	Ubiquitin mediated proteolysis
hsa00670	13	0.835888	0.719622	One carbon pool by folate
hsa00051	24	0.801462	0.722931	Fructose and mannose metabolism
hsa05140	45	0.820711	0.725133	Leishmaniasis
hsa05210	49	0.752829	0.730862	Colorectal cancer
hsa05340	25	0.930289	0.732597	Primary immunodeficiency
hsa04512	66	0.763184	0.736257	ECM-receptor interaction
hsa05416	42	0.781836	0.739986	Viral myocarditis
hsa04110	93	0.653304	0.743893	Cell cycle
hsa05130	38	0.823409	0.745654	Pathogenic Escherichia coli infection
hsa00030	14	0.7894	0.746135	Pentose phosphate pathway
hsa03010	51	0.819821	0.74826	Ribosome
hsa00512	20	0.696741	0.749016	O-Glycan biosynthesis
hsa05110	36	0.882575	0.755798	Vibrio cholerae infection
hsa04640	62	0.870174	0.757194	Hematopoietic cell lineage
hsa04920	52	0.613293	0.766557	Adipocytokine signaling pathway
hsa05222	56	0.640279	0.76752	Small cell lung cancer
hsa04114	81	0.525876	0.773237	Oocyte meiosis
hsa00500	34	0.736553	0.773941	Starch and sucrose metabolism
hsa05220	52	0.862058	0.776759	Chronic myeloid leukemia
hsa05142	79	0.7947	0.778311	Chagas disease
hsa04614	11	0.828413	0.780317	Renin-angiotensin system
hsa00240	59	0.882247	0.783391	Pyrimidine metabolism
hsa00970	30	0.938504	0.784848	Aminoacyl-tRNA biosynthesis
hsa05410	58	0.897778	0.786074	Hypertrophic cardiomyopathy (HCM)
hsa05218	50	0.747364	0.786688	Melanoma
hsa04950	21	0.986896	0.788612	Maturity onset diabetes of the young
hsa04666	59	0.763118	0.789374	Fc gamma R-mediated phagocytosis
hsa00561	34	0.811967	0.789988	Glycerolipid metabolism
hsa03020	16	0.951635	0.790637	RNA polymerase
hsa04540	65	0.812543	0.792611	Gap junction
hsa05414	63	0.884924	0.7933	Dilated cardiomyopathy
hsa05412	49	0.902979	0.79492	Arrhythmogenic right ventricular cardiomyopathy (ARVC)
hsa04270	94	0.789356	0.799176	Vascular smooth muscle contraction
hsa00230	100	0.84391	0.802202	Purine metabolism
hsa03420	35	0.845699	0.80689	Nucleotide excision repair
hsa00592	15	0.711203	0.80762	alpha-Linolenic acid metabolism
hsa04115	51	0.822108	0.807927	p53 signaling pathway
hsa05100	42	0.912941	0.808212	Bacterial invasion of epithelial cells
hsa00565	29	0.773295	0.808769	Ether lipid metabolism
hsa04660	78	0.870855	0.810209	T cell receptor signaling pathway
hsa04520	54	0.914499	0.811112	Adherens junction
hsa04930	29	0.803126	0.812002	Type II diabetes mellitus
hsa04720	44	0.871974	0.812255	Long-term potentiation
hsa00480	28	0.949262	0.813135	Glutathione metabolism
hsa04914	60	0.677461	0.814324	Progesterone-mediated oocyte maturation
hsa04664	57	0.781455	0.814628	Fc epsilon RI signaling pathway
hsa03030	25	0.833356	0.818412	DNA replication
hsa04730	52	0.7955	0.818454	Long-term depression
hsa00564	59	0.808285	0.82129	Glycerophospholipid metabolism
hsa04530	93	0.799958	0.822848	Tight junction
hsa04140	21	0.965425	0.82747	Regulation of autophagy
hsa00600	27	0.915624	0.833271	Sphingolipid metabolism
hsa05214	45	0.891415	0.833594	Glioma
hsa04916	78	0.781978	0.837403	Melanogenesis
hsa04910	93	0.865268	0.838516	Insulin signaling pathway
hsa00591	21	-0.208274	0.838563	Linoleic acid metabolism
hsa04350	67	0.863614	0.838756	TGF-beta signaling pathway
hsa05212	46	0.898619	0.855108	Pancreatic cancer
hsa05216	22	0.766795	0.855397	Thyroid cancer
hsa04210	63	0.826334	0.858722	Apoptosis
hsa03018	41	0.879083	0.859764	RNA degradation
hsa05211	42	0.878061	0.861431	Renal cell carcinoma
hsa04964	19	0.520756	0.861705	Proximal tubule bicarbonate reclamation
hsa03040	86	0.863563	0.863486	Spliceosome
hsa05219	25	0.923733	0.865227	Bladder cancer
hsa05215	60	0.911174	0.868966	Prostate cancer
hsa04670	68	0.921316	0.872614	Leukocyte transendothelial migration
hsa04370	52	0.869428	0.878022	VEGF signaling pathway
hsa04722	78	0.854983	0.884546	Neurotrophin signaling pathway
hsa04912	70	0.862295	0.88684	GnRH signaling pathway
hsa05213	39	0.930647	0.889751	Endometrial cancer
hsa00601	13	0.986949	0.89488	Glycosphingolipid biosynthesis - lacto and neolacto series
hsa00760	16	0.896911	0.895587	Nicotinate and nicotinamide metabolism
hsa04070	53	0.91604	0.897236	Phosphatidylinositol signaling system
hsa00562	39	0.928396	0.906296	Inositol phosphate metabolism
hsa03050	35	0.631678	0.907279	Proteasome
hsa04962	29	0.770281	0.907901	Vasopressin-regulated water reabsorption
hsa00450	19	0.861767	0.908943	Selenoamino acid metabolism
hsa05223	37	0.901585	0.909007	Non-small cell lung cancer
hsa03060	15	0.885309	0.91384	Protein export
hsa05221	37	0.932976	0.92078	Acute myeloid leukemia
hsa00604	16	0.975302	0.921397	Glycosphingolipid biosynthesis - ganglio series
hsa04012	51	0.92599	0.922045	ErbB signaling pathway
hsa04150	28	0.965765	0.930817	mTOR signaling pathway
hsa03022	24	0.946162	0.933279	Basal transcription factors
	45.8041
		0.0597015

## Sheet: Supplemental Table S4
Reactome
Number of genes	f_EA	f_AA	Description
17	-0.967283	0.891422	Gap junction assembly
10	-0.965371	-0.426855	Synthesis, secretion, and deacylation of Ghrelin
21	-0.96207	-0.699652	Beta defensins
12	-0.950216	0.053105	Peptide hormone biosynthesis
12	-0.947586	-0.909906	Tandem pore domain potassium channels
11	-0.945702	0.74815	FGFR1c ligand binding and activation
11	-0.945702	0.74815	Signaling by activated point mutants of FGFR1
13	-0.934083	-0.278885	Creation of C4 and C2 activators
18	-0.932288	-0.137524	Synthesis of PC
10	-0.916991	0.515207	mRNA decay by 5 to 3 exoribonuclease
10	-0.912718	0.670136	FGFR3 ligand binding and activation
10	-0.912718	0.670136	FGFR3c ligand binding and activation
10	-0.912718	0.670136	Signaling by FGFR3 mutants
10	-0.912718	0.670136	Signaling by activated point mutants of FGFR3
10	-0.912594	0.504441	Mitotic Telophase/Cytokinesis
10	-0.910856	-0.590772	CYP2E1 reactions
12	-0.910357	0.314364	FGFR4 ligand binding and activation
10	-0.908636	-0.949428	Eicosanoid ligand-binding receptors
11	-0.908106	-0.534447	CDC6 association with the ORC:origin complex
16	-0.907171	0.555489	Acyl chain remodelling of PS
11	-0.901337	-0.606584	SLBP Dependent Processing of Replication-Dependent Histone Pre-mRNAs
10	-0.897737	-0.627072	SLBP independent Processing of Histone Pre-mRNAs
10	-0.886767	-0.630877	Dermatan sulfate biosynthesis
12	-0.881538	-0.816328	Passive transport by Aquaporins
17	-0.881512	0.492657	Signaling by NODAL
12	-0.872913	0.79454	FGFR2c ligand binding and activation
15	-0.856888	-0.402549	Synthesis of very long-chain fatty acyl-CoAs
10	-0.847386	-0.256657	E2F-enabled inhibition of pre-replication complex formation
13	-0.826377	0.685704	FGFR1 ligand binding and activation
19	-0.800977	0.476237	FGFR ligand binding and activation
11	-0.784665	-0.821358	Reversible hydration of carbon dioxide
14	-0.765178	0.7627	Activated point mutants of FGFR2
14	-0.765178	0.7627	FGFR2 ligand binding and activation
14	-0.765178	0.7627	Signaling by FGFR2 mutants
24	-0.740646	-0.837578	Defensins
11	-0.712796	-0.731644	Pyrimidine catabolism
18	-0.704187	-0.20233	Xenobiotics
17	-0.637657	0.508048	Removal of DNA patch containing abasic residue
17	-0.637657	0.508048	Resolution of AP sites via the multiple-nucleotide patch replacement pathway
11	-0.611603	-0.090995	Synthesis of PE
19	-0.605296	0.376375	Base Excision Repair
19	-0.605296	0.376375	Resolution of Abasic Sites (AP sites)
16	-0.587087	-0.578256	Endogenous sterols
13	-0.573496	-0.510312	Death Receptor Signalling
13	-0.573496	-0.510312	Extrinsic Pathway for Apoptosis
14	-0.570179	0.728952	Packaging Of Telomere Ends
12	-0.521803	0.407473	CS/DS degradation
25	-0.497007	0.646303	SHC-mediated cascade
15	-0.496915	-0.549528	Mitochondrial Fatty Acid Beta-Oxidation
13	-0.496025	-0.268425	Metabolism of polyamines
10	-0.469624	0.559561	Highly calcium permeable postsynaptic nicotinic acetylcholine receptors
13	-0.456852	-0.447117	Signaling by Activin
15	-0.455718	-0.212797	Post-chaperonin tubulin folding pathway
29	-0.455534	0.327935	Keratan sulfate/keratin metabolism
12	-0.430368	-0.551939	Golgi Cisternae Pericentriolar Stack Reorganization
25	-0.415008	0.244958	Keratan sulfate biosynthesis
14	-0.382707	0.90099	Beta-catenin phosphorylation cascade
14	-0.382707	0.90099	Degradation of beta-catenin by the destruction complex
10	-0.359734	-0.398279	Ethanol oxidation
25	-0.328494	0.4775	PERK regulates gene expression
20	-0.315666	0.43524	SHC1 events in ERBB4 signaling
14	-0.303155	-0.252193	Synthesis of bile acids and bile salts via 24-hydroxycholesterol
16	-0.30125	0.622218	Platelet sensitization by LDL
11	-0.297396	-0.339507	Hormone-sensitive lipase (HSL)-mediated triacylglycerol hydrolysis
10	-0.272248	-0.186802	Base-free sugar-phosphate removal via the single-nucleotide replacement pathway
16	-0.235817	0.50468	Incretin synthesis, secretion, and inactivation
12	-0.235746	-0.540272	Resolution of AP sites via the single-nucleotide replacement pathway
12	-0.218024	-0.262414	Facilitative Na+-independent glucose transporters
19	-0.18958	0.224693	Fatty Acyl-CoA Biosynthesis
13	-0.187297	0.429584	Early Phase of HIV Life Cycle
11	-0.181994	0.821053	Purine salvage
10	-0.181425	0.330252	Heme biosynthesis
45	-0.15328	0.288793	Cytochrome P450 - arranged by substrate type
23	-0.151827	0.881652	RNA Polymerase III Transcription Initiation From Type 1 Promoter
23	-0.151827	0.881652	RNA Polymerase III Transcription Initiation From Type 2 Promoter
18	-0.110595	0.885427	CD28 dependent PI3K/Akt signaling
14	-0.104451	0.481382	Metabolism of porphyrins
13	-0.086305	0.792274	Synthesis, secretion, and inactivation of Glucagon-like Peptide-1 (GLP-1)
11	-0.039403	0.790995	Processing of Intronless Pre-mRNAs
32	-0.035725	0.639871	FRS2-mediated cascade
18	-0.034761	-0.422741	RIP-mediated NFkB activation via ZBP1
20	-0.021737	-0.552546	Post-Elongation Processing of Intronless pre-mRNA
20	-0.021737	-0.552546	Processing of Capped Intronless Pre-mRNA
61	-0.021167	0.314123	Phase 1 - Functionalization of compounds
42	0.016823	-0.143352	Voltage gated Potassium channels
18	0.020788	0.829462	ERK/MAPK targets
18	0.023544	-0.032245	Cobalamin (Cbl, vitamin B12) transport and metabolism
11	0.023723	0.635261	NICD traffics to nucleus
11	0.023723	0.635261	Notch-HLH transcription pathway
10	0.114797	0.008939	mRNA decay by 3 to 5 exoribonuclease
16	0.121854	0.695393	Acyl chain remodelling of PG
83	0.124259	0.746993	RNA Polymerase I, RNA Polymerase III, and Mitochondrial Transcription
25	0.134617	0.354156	Gap junction trafficking and regulation
16	0.149445	-0.250037	ABCA transporters in lipid homeostasis
21	0.159906	0.952117	RNA Polymerase III Transcription Termination
22	0.171515	0.167839	Pyrimidine metabolism
11	0.177849	0.265814	Processive synthesis on the lagging strand
16	0.185785	0.960963	RNA Polymerase III Chain Elongation
24	0.196062	0.437429	Gap junction trafficking
34	0.205251	0.745101	RNA Polymerase I Transcription Initiation
58	0.206655	0.376355	Respiratory electron transport
11	0.215015	0.4829	Synthesis of PIPs at the early endosome membrane
35	0.216553	0.218651	Intrinsic Pathway for Apoptosis
46	0.219255	0.742034	RNA Polymerase I Promoter Clearance
48	0.226079	0.743446	RNA Polymerase I Transcription
16	0.226957	0.743623	Acyl chain remodelling of PI
27	0.234969	0.545854	Glycosphingolipid metabolism
10	0.244856	0.543886	alpha-linolenic (omega3) and linoleic (omega6) acid metabolism
10	0.244856	0.543886	alpha-linolenic acid (ALA) metabolism
15	0.248775	0.27511	Polo-like kinase mediated events
21	0.260996	0.661955	PTM: gamma carboxylation, hypusine formation and arylsulfatase activation
22	0.283088	0.578279	ATF4 activates genes
22	0.288386	-0.343425	Synthesis of bile acids and bile salts
33	0.289313	0.581628	Pyruvate metabolism and Citric Acid (TCA) cycle
10	0.307042	0.066215	Removal of the Flap Intermediate
11	0.3202	0.479457	NF-kB activation through FADD/RIP-1 pathway mediated by caspase-8 and -10
29	0.320707	0.465115	Amine compound SLC transporters
10	0.34095	0.951773	Tetrahydrobiopterin (BH4) synthesis, recycling, salvage and regulation
22	0.34585	0.788143	Acyl chain remodelling of PE
15	0.360951	0.643473	Pyruvate metabolism
10	0.362179	0.909337	Vitamin B5 (pantothenate) metabolism
41	0.376139	0.715836	Chemokine receptors bind chemokines
14	0.378194	0.388359	STING mediated induction of host immune responses
15	0.3784	0.707168	Butyrate Response Factor 1 (BRF1) destabilizes mRNA
80	0.381493	0.508429	Glycerophospholipid biosynthesis
22	0.386342	0.401464	DARPP-32 events
24	0.389844	0.749711	disassembly of the destruction complex and recruitment of AXIN to the membrane
20	0.393394	0.622989	A tetrasaccharide linker sequence is required for GAG synthesis
11	0.394312	0.739574	Transport of organic anions
15	0.395768	0.419038	negative regulation of TCF-dependent signaling by WNT ligand antagonists
23	0.398345	0.474179	TRP channels
12	0.414391	0.353331	IRF3-mediated induction of type I IFN
26	0.41527	0.61796	Deposition of new CENPA-containing nucleosomes at the centromere
26	0.41527	0.61796	Nucleosome assembly
36	0.41541	0.894814	RNA Polymerase III Abortive And Retractive Initiation
36	0.41541	0.894814	RNA Polymerase III Transcription
24	0.41668	0.671259	Acyl chain remodelling of PC
23	0.422128	0.479723	ZBP1(DAI) mediated induction of type I IFNs
31	0.423051	0.90192	RNA Polymerase III Transcription Initiation
79	0.429604	0.498992	Resolution of Sister Chromatid Cohesion
87	0.429789	0.489831	Mitotic Prometaphase
68	0.440715	0.514197	RIG-I/MDA5 mediated induction of IFN-alpha/beta pathways
31	0.442844	0.571241	Transport of vitamins, nucleosides, and related molecules
41	0.447022	0.663176	Chondroitin sulfate/dermatan sulfate metabolism
17	0.448	0.617763	Inactivation of APC/C via direct inhibition of the APC/C complex
17	0.448	0.617763	Inhibition of the proteolytic activity of APC/C required for the onset of anaphase by mitotic spindle checkpoint components
17	0.448	0.617763	Mitotic Spindle Checkpoint
13	0.450232	0.499726	Intrinsic Pathway
16	0.450941	0.670858	Formation of tubulin folding intermediates by CCT/TriC
10	0.454939	-0.649824	Phosphorylation of CD3 and TCR zeta chains
22	0.455808	0.220083	Cyclin A/B1 associated events during G2/M transition
16	0.461087	0.889005	Phosphorylation of the APC/C
27	0.465156	0.381482	TRAF6 mediated IRF7 activation
29	0.47399	0.512446	Activation of Matrix Metalloproteinases
47	0.474785	0.668269	Interferon alpha/beta signaling
20	0.477111	-0.446376	Condensation of Prophase Chromosomes
18	0.477216	-0.145112	Antigen Presentation: Folding, assembly and peptide loading of class I MHC
91	0.484767	0.542369	Transport of glucose and other sugars, bile salts and organic acids, metal ions and amine compounds
33	0.497408	0.611444	Complement cascade
22	0.49796	0.655129	Glutathione conjugation
42	0.498122	0.681706	Cross-presentation of soluble exogenous antigens (endosomes)
15	0.501497	0.586381	Tristetraprolin (TTP) destabilizes mRNA
10	0.501619	0.575168	Regulation of the Fanconi anemia pathway
13	0.50396	0.715293	Acetylcholine Binding And Downstream Events
13	0.50396	0.715293	Activation of Nicotinic Acetylcholine Receptors
13	0.50396	0.715293	Postsynaptic nicotinic acetylcholine receptors
21	0.50686	0.619775	Sema4D induced cell migration and growth-cone collapse
17	0.508104	0.669857	Chondroitin sulfate biosynthesis
77	0.511205	0.579301	Defective AMN causes hereditary megaloblastic anemia 1
77	0.511205	0.579301	Defective BTD causes biotidinase deficiency
77	0.511205	0.579301	Defective CD320 causes methylmalonic aciduria
77	0.511205	0.579301	Defective CUBN causes hereditary megaloblastic anemia 1
77	0.511205	0.579301	Defective GIF causes intrinsic factor deficiency
77	0.511205	0.579301	Defective HLCS causes multiple carboxylase deficiency
77	0.511205	0.579301	Defective LMBRD1 causes methylmalonic aciduria and homocystinuria type cblF
77	0.511205	0.579301	Defective MMAA causes methylmalonic aciduria type cblA
77	0.511205	0.579301	Defective MMAB causes methylmalonic aciduria type cblB
77	0.511205	0.579301	Defective MMACHC causes methylmalonic aciduria and homocystinuria type cblC
77	0.511205	0.579301	Defective MMADHC causes methylmalonic aciduria and homocystinuria type cblD
77	0.511205	0.579301	Defective MTR causes methylmalonic aciduria and homocystinuria type cblG
77	0.511205	0.579301	Defective MTRR causes methylmalonic aciduria and homocystinuria type cblE
77	0.511205	0.579301	Defective MUT causes methylmalonic aciduria mut type
77	0.511205	0.579301	Defective TCN2 causes hereditary megaloblastic anemia
77	0.511205	0.579301	Defects in biotin (Btn) metabolism
77	0.511205	0.579301	Defects in cobalamin (B12) metabolism
77	0.511205	0.579301	Defects in vitamin and cofactor metabolism
77	0.511205	0.579301	Metabolism of vitamins and cofactors
77	0.511205	0.579301	Metabolism of water-soluble vitamins and cofactors
27	0.515504	0.218303	Transferrin endocytosis and recycling
36	0.520065	0.76146	Interleukin-1 signaling
47	0.524853	0.691165	Interferon gamma signaling
11	0.525168	0.397788	Synthesis of bile acids and bile salts via 27-hydroxycholesterol
42	0.528512	0.600782	O-linked glycosylation of mucins
89	0.529102	0.555448	Nonsense Mediated Decay (NMD) enhanced by the Exon Junction Complex (EJC)
89	0.529102	0.555448	Nonsense-Mediated Decay (NMD)
51	0.529146	0.485105	Immunoregulatory interactions between a Lymphoid and a non-Lymphoid cell
57	0.529167	0.565246	Cytosolic sensors of pathogen-associated DNA
72	0.531032	0.538212	Stimuli-sensing channels
20	0.533299	0.489067	TRAF6 mediated NF-kB activation
11	0.537409	0.184454	Platelet Adhesion to exposed collagen
10	0.541488	0.914716	Serotonin receptors
65	0.549776	0.645119	Antigen processing-Cross presentation
15	0.561632	0.524807	Zinc transporters
14	0.562257	0.46676	TRAF3-dependent IRF activation pathway
20	0.564165	-0.364586	Post-translational modification: synthesis of GPI-anchored proteins
76	0.568039	0.419212	Respiratory electron transport, ATP synthesis by chemiosmotic coupling, and heat production by uncoupling proteins.
17	0.56808	0.630886	HS-GAG degradation
10	0.571102	0.661059	Dissolution of Fibrin Clot
16	0.57272	0.679043	Tie2 Signaling
19	0.573098	0.627517	Regulation of Complement cascade
27	0.574607	0.123507	Regulation of HSF1-mediated heat shock response
52	0.577653	0.251163	Costimulation by the CD28 family
12	0.580057	-0.283116	Synthesis of glycosylphosphatidylinositol (GPI)
37	0.581191	0.437497	Cleavage of Growing Transcript in the Termination Region
37	0.581191	0.437497	Post-Elongation Processing of the Transcript
37	0.581191	0.437497	RNA Polymerase II Transcription Termination
31	0.583872	0.277148	Bile acid and bile salt metabolism
31	0.585287	0.569488	Negative regulators of RIG-I/MDA5 signaling
19	0.591743	-0.24963	Synthesis of bile acids and bile salts via 7alpha-hydroxycholesterol
10	0.591751	0.913121	WNT5A-dependent internalization of FZD2, FZD5 and ROR2
10	0.59354	0.527239	Processive synthesis on the C-strand of the telomere
28	0.594847	0.541749	Formation of Fibrin Clot (Clotting Cascade)
77	0.596138	0.630171	Class B/2 (Secretin family receptors)
22	0.59701	0.681317	Sema4D in semaphorin signaling
10	0.598918	0.685097	Biotin transport and metabolism
34	0.60197	0.500201	Nuclear signaling by ERBB4
28	0.604376	0.933174	Post-Elongation Processing of Intron-Containing pre-mRNA
28	0.604376	0.933174	mRNA 3-end processing
43	0.608814	0.668422	Heparan sulfate/heparin (HS-GAG) metabolism
20	0.611058	0.54317	Attenuation phase
97	0.612119	0.511326	Mitotic G2-G2/M phases
28	0.616216	0.048108	Antigen activates B Cell Receptor (BCR) leading to generation of second messengers
95	0.616299	0.515064	G2/M Transition
28	0.616336	0.400599	Metabolism of steroid hormones and vitamin D
28	0.616336	0.400599	Steroid hormones
23	0.617189	0.793198	Kinesins
37	0.618028	0.823913	Amine ligand-binding receptors
36	0.618993	0.406289	Iron uptake and transport
58	0.621357	0.655506	Phase II conjugation
22	0.621595	0.09211	HSF1 activation
11	0.624425	0.857582	Presynaptic nicotinic acetylcholine receptors
50	0.625283	0.49621	Loss of Nlp from mitotic centrosomes
50	0.625283	0.49621	Loss of proteins required for interphase microtubule organizationÌâåÊfrom the centrosome
27	0.629022	0.659948	HSF1-dependent transactivation
31	0.633253	0.340165	Latent infection of Homo sapiens with Mycobacterium tuberculosis
31	0.633253	0.340165	Phagosomal maturation (early endosomal stage)
25	0.633721	0.76026	Sulfur amino acid metabolism
39	0.634033	0.487911	Signaling by FGFR mutants
13	0.634789	-0.66253	PD-1 signaling
12	0.635053	0.674543	Caspase-mediated cleavage of cytoskeletal proteins
57	0.639169	0.542869	Centrosome maturation
57	0.639169	0.542869	Recruitment of mitotic centrosome proteins and complexes
15	0.639298	0.1489	Inflammasomes
11	0.640132	0.449653	Recycling of bile acids and salts
21	0.642997	0.757753	RNA Polymerase I Transcription Termination
21	0.644613	0.55541	TAK1 activates NFkB by phosphorylation and activation of IKKs complex
41	0.645329	0.618157	Cellular response to heat stress
25	0.649271	0.754017	Glucagon-type ligand receptors
34	0.651013	0.402697	ABC-family proteins mediated transport
37	0.653413	0.685995	NRAGE signals death through JNK
14	0.65433	0.67689	KSRP destabilizes mRNA
93	0.659849	0.525336	Potassium Channels
27	0.660583	0.71695	Amino acid transport across the plasma membrane
65	0.661289	0.520997	Regulation of PLK1 Activity at G2/M Transition
18	0.664397	0.796356	Recycling pathway of L1
10	0.665294	-0.040625	The NLRP3 inflammasome
11	0.66615	0.424106	Leading Strand Synthesis
11	0.66615	0.424106	Polymerase switching
11	0.66615	0.424106	Polymerase switching on the C-strand of the telomere
23	0.667788	0.683365	Fertilization
23	0.667788	0.683365	Reproduction
86	0.66887	0.651176	Transport of inorganic cations/anions and amino acids/oligopeptides
51	0.671933	0.634357	Chromosome Maintenance
16	0.673877	0.453615	Lagging Strand Synthesis
26	0.674094	0.691572	Synthesis of PA
40	0.675701	0.429375	Nucleotide-binding domain, leucine rich repeat containing receptor (NLR) signaling pathways
21	0.676654	0.762489	Smooth Muscle Contraction
16	0.676796	0.817257	Conversion from APC/C:Cdc20 to APC/C:Cdh1 in late anaphase
18	0.678521	0.681063	Initial triggering of complement
14	0.679523	0.428683	Common Pathway
20	0.686458	0.791757	RNA Polymerase I Promoter Escape
23	0.686852	0.599655	WNT ligand biogenesis and trafficking
71	0.688146	0.679483	Unfolded Protein Response (UPR)
14	0.688806	0.358086	Signalling to p38 via RIT and RIN
14	0.693618	0.508331	Synthesis of Leukotrienes (LT) and Eoxins (EX)
44	0.695234	0.595261	Collagen biosynthesis and modifying enzymes
65	0.697188	0.650464	Peptide hormone metabolism
12	0.699905	0.55621	Regulation of innate immune responses to cytosolic DNA
67	0.705411	0.735656	Chromatin modifying enzymes
67	0.705411	0.735656	Chromatin organization
67	0.705411	0.735656	HATs acetylate histones
39	0.705489	0.698819	Elastic fibre formation
34	0.706111	0.61036	Activation of gene expression by SREBF (SREBP)
62	0.708085	0.733839	G alpha (12/13) signalling events
17	0.708645	0.772134	Dual incision reaction in GG-NER
17	0.708645	0.772134	Formation of incision complex in GG-NER
29	0.710288	0.812565	Thrombin signalling through proteinase activated receptors (PARs)
22	0.710291	0.729236	GRB2 events in ERBB2 signaling
30	0.710969	0.802654	RNA Polymerase I Chain Elongation
25	0.712269	0.588256	NOD1/2 Signaling Pathway
56	0.712399	0.713259	Integrin cell surface interactions
87	0.715843	0.762672	Role of LAT2/NTAL/LAB on calcium mobilization
51	0.715948	0.715697	Cell death signalling via NRAGE, NRIF and NADE
16	0.716764	0.917924	Metabolism of nitric oxide
16	0.716764	0.917924	eNOS activation and regulation
21	0.717799	0.47899	Fanconi Anemia pathway
84	0.717943	0.758963	GAB1 signalosome
23	0.718117	0.731201	Laminin interactions
48	0.71821	0.790795	ECM proteoglycans
14	0.718263	0.604543	activated TAK1 mediates p38 MAPK activation
24	0.719221	0.81546	Glycolysis
64	0.719964	0.618302	Metabolism of nucleotides
15	0.72061	0.606095	Rap1 signalling
38	0.720663	0.589658	Triglyceride Biosynthesis
81	0.721525	0.770351	PI-3K cascade
81	0.721525	0.770351	PI3K events in ERBB2 signaling
81	0.721525	0.770351	PI3K events in ERBB4 signaling
81	0.721525	0.770351	PI3K/AKT Signaling in Cancer
81	0.721525	0.770351	PIP3 activates AKT signaling
48	0.721711	0.768946	Aquaporin-mediated transport
46	0.722022	0.591876	Metabolism of non-coding RNA
46	0.722022	0.591876	snRNP Assembly
76	0.723217	0.766443	Constitutive PI3K/AKT Signaling in Cancer
20	0.723336	0.417652	N-glycan antennae elongation in the medial/trans-Golgi
27	0.724044	0.723516	DNA strand elongation
20	0.724445	0.947808	APC/C:Cdc20 mediated degradation of Cyclin B
73	0.724748	0.702048	O-linked glycosylation
84	0.724835	0.767121	PI3K/AKT activation
29	0.727507	0.466149	Signaling by FGFR1 mutants
10	0.728272	0.743055	Recruitment of NuMA to mitotic centrosomes
70	0.728463	0.724463	p75 NTR receptor-mediated signalling
37	0.729573	0.703809	NOTCH1 Intracellular Domain Regulates Transcription
39	0.729834	0.757813	Deadenylation-dependent mRNA decay
74	0.733646	0.648026	MHC class II antigen presentation
10	0.734924	0.835572	Gamma-carboxylation, transport, and amino-terminal cleavage of proteins
20	0.734982	0.742602	Pre-NOTCH Transcription and Translation
43	0.735584	0.872384	NoRC negatively regulates rRNA expression
13	0.73629	0.775828	Downregulation of ERBB2:ERBB3 signaling
37	0.736466	0.758682	Activation of ATR in response to replication stress
12	0.738161	0.750587	Formation of Senescence-Associated Heterochromatin Foci (SAHF)
29	0.738374	0.695368	E2F mediated regulation of DNA replication
17	0.738708	0.445147	Regulation of IFNA signaling
42	0.740623	0.731514	Muscle contraction
43	0.740996	0.797959	Regulation of ornithine decarboxylase (ODC)
64	0.743464	0.776806	APC/C:Cdc20 mediated degradation of mitotic proteins
56	0.743575	0.739664	Sphingolipid metabolism
12	0.743964	0.716691	Metabolism of Angiotensinogen to Angiotensins
24	0.745438	0.744508	SHC1 events in ERBB2 signaling
45	0.745997	0.876504	Negative epigenetic regulation of rRNA expression
27	0.746097	0.810549	CD28 co-stimulation
72	0.747012	0.70115	Degradation of the extracellular matrix
44	0.747045	0.755572	G2/M Checkpoints
69	0.747492	0.756384	Regulation of insulin secretion
23	0.747527	0.756657	Activation of BH3-only proteins
35	0.747546	0.517708	Transport to the Golgi and subsequent modification
28	0.747786	0.0883	Downstream TCR signaling
41	0.748861	0.735586	MAP kinase activation in TLR cascade
59	0.749976	0.832208	APC/C:Cdc20 mediated degradation of Securin
65	0.750688	0.608939	Antiviral mechanism by IFN-stimulated genes
65	0.750688	0.608939	ISG15 antiviral mechanism
65	0.751543	0.775888	Activation of APC/C and APC/C:Cdc20 mediated degradation of mitotic proteins
72	0.752337	0.644954	Response to elevated platelet cytosolic Ca2+
57	0.754318	0.81364	Epigenetic regulation of gene expression
67	0.754375	0.641158	Platelet degranulation
91	0.754662	0.630448	Activated TLR4 signalling
11	0.7562	0.71607	Glycogen breakdown (glycogenolysis)
90	0.756291	0.650341	Signaling by NOTCH
99	0.757064	0.7085	PPARA activates gene expression
80	0.757664	0.621715	MyD88-independent cascade
80	0.757664	0.621715	TRIF-mediated TLR3/TLR4 signaling
80	0.757664	0.621715	Toll Like Receptor 3 (TLR3) Cascade
93	0.758511	0.774719	Rho GTPase cycle
93	0.758511	0.774719	Signaling by Rho GTPases
12	0.758825	0.810291	ERKs are inactivated
16	0.759007	0.819991	SHC-related events triggered by IGF1R
50	0.761151	0.86095	Phospholipase C-mediated cascade
93	0.762129	0.815816	Integration of energy metabolism
22	0.762345	0.785218	APC-Cdc20 mediated degradation of Nek2A
58	0.763113	0.782492	Semaphorin interactions
64	0.763749	0.66083	Collagen formation
18	0.764801	0.82753	Other semaphorin interactions
34	0.765145	0.651535	Platelet Aggregation (Plug Formation)
11	0.765306	0.757934	Calnexin/calreticulin cycle
98	0.76539	0.630129	Toll Like Receptor 4 (TLR4) Cascade
45	0.765698	0.746994	Amino acid and oligopeptide SLC transporters
12	0.767809	0.761181	N-glycan trimming in the ER and Calnexin/Calreticulin cycle
14	0.768033	0.797081	Hyaluronan metabolism
12	0.768845	0.622865	DCC mediated attractive signaling
28	0.769335	0.765816	Collagen degradation
31	0.770395	0.741468	O-glycosylation of TSR domain-containing proteins
43	0.77093	0.653567	Assembly of collagen fibrils and other multimeric structures
34	0.772396	0.795911	Meiotic synapsis
22	0.773046	0.801927	Cooperation of Prefoldin and TriC/CCT in actin and tubulin folding
21	0.773046	0.801927	Prefoldin mediated transfer of substrate to CCT/TriC
21	0.773217	0.429658	Inactivation, recovery and regulation of the phototransduction cascade
22	0.773217	0.429658	The phototransduction cascade
62	0.774261	0.791416	Glucose metabolism
31	0.774634	0.787522	Ion transport by P-type ATPases
16	0.775495	0.873036	Citric acid cycle (TCA cycle)
39	0.775634	0.752786	Glucagon-like Peptide-1 (GLP1) regulates insulin secretion
46	0.775792	0.754979	Protein folding
18	0.776217	0.509182	Termination of O-glycan biosynthesis
18	0.77629	0.732417	Regulation of Insulin-like Growth Factor (IGF) transport and uptake by Insulin-like Growth Factor Binding Proteins (IGFBPs)
11	0.77784	0.86665	Unwinding of DNA
19	0.778091	0.510368	regulation of FZD by ubiquitination
97	0.779093	0.768004	Factors involved in megakaryocyte development and platelet production
22	0.779713	0.713425	Glutamate Binding, Activation of AMPA Receptors and Synaptic Plasticity
22	0.779713	0.713425	Trafficking of AMPA receptors
15	0.780429	0.917514	N-Glycan antennae elongation
26	0.782094	0.793944	HS-GAG biosynthesis
40	0.782103	0.79154	Non-integrin membrane-ECM interactions
25	0.782903	0.960282	RNA Polymerase III Transcription Initiation From Type 3 Promoter
18	0.783213	0.397586	Signaling by FGFR1 fusion mutants
13	0.786424	0.922005	Cytosolic sulfonation of small molecules
40	0.787222	0.746188	Chaperonin-mediated protein folding
44	0.787898	0.69617	IRE1alpha activates chaperones
35	0.788083	0.704813	Netrin-1 signaling
43	0.788147	0.701914	XBP1(S) activates chaperone genes
11	0.788211	0.810913	Hyaluronan uptake and degradation
12	0.78936	0.778832	JNK (c-Jun kinases) phosphorylation and activation mediated by activated human TAK1
64	0.790061	0.819501	APC/C:Cdh1 mediated degradation of Cdc20 and other APC/C:Cdh1 targeted proteins in late mitosis/early G1
35	0.790904	0.79674	Negative regulation of FGFR signaling
26	0.791372	0.645506	Integrin alphaIIb beta3 signaling
55	0.791531	0.764516	Regulation of Apoptosis
25	0.793245	0.741727	Striated Muscle Contraction
60	0.794003	0.593065	Biosynthesis of the N-glycan precursor (dolichol lipid-linked oligosaccharide, LLO) and transfer to a nascent protein
10	0.794943	0.778539	Interaction With The Zona Pellucida
10	0.794978	0.848836	Abacavir transport and metabolism
25	0.796	0.838031	Pausing and recovery of Tat-mediated HIV elongation
25	0.796	0.838031	Tat-mediated HIV elongation arrest and recovery
66	0.796394	0.753533	MyD88 cascade initiated on plasma membrane
66	0.796394	0.753533	Toll Like Receptor 10 (TLR10) Cascade
66	0.796394	0.753533	Toll Like Receptor 5 (TLR5) Cascade
27	0.79642	0.865283	Purine metabolism
10	0.796738	0.773077	Methylation
10	0.797265	0.70055	CD28 dependent Vav1 pathway
28	0.797453	0.808102	Molecules associated with elastic fibres
33	0.798197	0.792852	Class C/3 (Metabotropic glutamate/pheromone receptors)
79	0.798995	0.779395	Diseases associated with visual transduction
79	0.798995	0.779395	Visual phototransduction
50	0.799384	0.809054	Transport of Mature Transcript to Cytoplasm
33	0.800576	0.772789	Transport of Mature mRNAs Derived from Intronless Transcripts
45	0.800796	0.685041	Lipid digestion, mobilization, and transport
26	0.801349	0.840113	Elongation arrest and recovery
26	0.801349	0.840113	HIV elongation arrest and recovery
26	0.801349	0.840113	Pausing and recovery of HIV elongation
13	0.801355	0.905285	RNA Polymerase I Promoter Opening
35	0.802095	0.869322	Formation of HIV-1 elongation complex containing HIV-1 Tat
35	0.802095	0.869322	HIV Transcription Elongation
35	0.802095	0.869322	Tat-mediated elongation of the HIV-1 transcript
32	0.802393	0.772291	Transport of Mature mRNA Derived from an Intronless Transcript
64	0.802501	0.794933	Cdc20:Phospho-APC/C mediated degradation of Cyclin A
39	0.802538	0.576366	Arachidonic acid metabolism
56	0.803224	0.812925	Autodegradation of Cdh1 by Cdh1:APC/C
21	0.803288	0.554671	Double-Strand Break Repair
36	0.805066	0.870366	Formation of HIV elongation complex in the absence of HIV Tat
36	0.805066	0.870366	Formation of RNA Pol II elongation complex
36	0.805066	0.870366	RNA Polymerase II Transcription Elongation
25	0.805678	0.767364	Association of TriC/CCT with target proteins during biosynthesis
30	0.806913	0.786827	Transport of the SLBP Dependant Mature mRNA
31	0.807049	0.765843	Nuclear Pore Complex (NPC) Disassembly
46	0.807139	0.819036	Transport of Mature mRNA derived from an Intron-Containing Transcript
59	0.807787	0.753912	FBXW7 Mutants and NOTCH1 in Cancer
59	0.807787	0.753912	Signaling by NOTCH1
59	0.807787	0.753912	Signaling by NOTCH1 HD Domain Mutants in Cancer
59	0.807787	0.753912	Signaling by NOTCH1 HD+PEST Domain Mutants in Cancer
59	0.807787	0.753912	Signaling by NOTCH1 PEST Domain Mutants in Cancer
59	0.807787	0.753912	Signaling by NOTCH1 in Cancer
59	0.807787	0.753912	Signaling by NOTCH1 t(7;9)(NOTCH1:M1580_K2555) Translocation Mutant
29	0.808748	0.786291	Transport of the SLBP independent Mature mRNA
10	0.808882	0.728575	Cytosolic iron-sulfur cluster assembly
39	0.809748	0.815452	Retinoid metabolism and transport
63	0.810641	0.799728	Assembly of the pre-replicative complex
60	0.811093	0.715566	Meiosis
13	0.811178	0.928236	Adenylate cyclase inhibitory pathway
13	0.811178	0.928236	Inhibition of adenylate cyclase pathway
73	0.811468	0.748854	MyD88:Mal cascade initiated on plasma membrane
73	0.811468	0.748854	Toll Like Receptor 2 (TLR2) Cascade
73	0.811468	0.748854	Toll Like Receptor TLR1:TLR2 Cascade
73	0.811468	0.748854	Toll Like Receptor TLR6:TLR2 Cascade
10	0.81148	0.63427	Netrin mediated repulsion signals
21	0.8125	0.640049	Extension of Telomeres
45	0.812538	0.768665	Constitutive Signaling by NOTCH1 HD+PEST Domain Mutants
45	0.812538	0.768665	Constitutive Signaling by NOTCH1 PEST Domain Mutants
65	0.813115	0.757151	TRAF6 mediated induction of NFkB and MAP kinases upon TLR7/8 or 9 activation
50	0.813583	0.866852	RNA Polymerase II Pre-transcription Events
27	0.814626	0.780743	Transport of Ribonucleoproteins into the Host Nucleus
52	0.814773	0.86896	Transcription of the HIV genome
67	0.814844	0.761462	MyD88 dependent cascade initiated on endosome
67	0.814844	0.761462	Toll Like Receptor 7/8 (TLR7/8) Cascade
19	0.814914	0.883249	Abortive elongation of HIV-1 transcript in the absence of Tat
58	0.815471	0.75716	TRAF6 Mediated Induction of proinflammatory cytokines
71	0.815532	0.773373	Toll Like Receptor 9 (TLR9) Cascade
23	0.816378	0.673411	Cytosolic tRNA aminoacylation
14	0.816869	0.843817	Sema3A PAK dependent Axon repulsion
74	0.817117	0.833105	Opioid Signalling
45	0.818059	0.722918	Regulation of cholesterol biosynthesis by SREBP (SREBF)
99	0.818674	0.681657	DNA Repair
30	0.81887	0.778184	Interactions of Vpr with host cellular proteins
35	0.819535	0.670622	Telomere Maintenance
23	0.819804	0.683193	Insulin receptor recycling
22	0.819967	0.740335	Metal ion SLC transporters
10	0.820113	0.931678	Adenylate cyclase activating pathway
19	0.82069	0.815217	Peroxisomal lipid metabolism
29	0.821616	0.777151	Vpr-mediated nuclear import of PICs
27	0.822209	0.791021	Regulation of Glucokinase by Glucokinase Regulatory Protein
36	0.822481	0.691885	Transcriptional activation of mitochondrial biogenesis
19	0.823018	0.634541	Ligand-gated ion channel transport
22	0.823289	0.889058	Effects of PIP2 hydrolysis
36	0.823358	0.758179	Pre-NOTCH Expression and Processing
72	0.823829	0.738197	Regulation of APC/C activators between G1/S and early anaphase
31	0.824542	0.533931	Amyloids
17	0.824762	0.801693	SIRT1 negatively regulates rRNA Expression
27	0.824904	0.677516	Signaling by NOTCH2
14	0.826781	0.875907	CRMPs in Sema3A signaling
29	0.826965	0.842495	Gluconeogenesis
77	0.827447	0.741204	APC/C-mediated degradation of cell cycle proteins
77	0.827447	0.741204	Regulation of mitotic cell cycle
54	0.827842	0.711576	CDT1 association with the CDC6:ORC:origin complex
15	0.828386	0.634311	HDL-mediated lipid transport
23	0.828568	0.844035	Signaling by Robo receptor
13	0.828695	0.810054	SEMA3A-Plexin repulsion signaling by inhibiting Integrin adhesion
27	0.828826	0.717874	NCAM1 interactions
42	0.829191	0.7824	Hexose transport
36	0.829462	0.767197	DNA Damage/Telomere Stress Induced Senescence
15	0.830737	0.593745	GRB2:SOS provides linkage to MAPK signaling for Integrins
26	0.830817	0.878105	Activation of Kainate Receptors upon glutamate binding
84	0.831305	0.727528	Cell surface interactions at the vascular wall
27	0.831338	0.906828	Formation of the Early Elongation Complex
27	0.831338	0.906828	Formation of the HIV-1 Early Elongation Complex
68	0.832579	0.718575	Transcriptional regulation of white adipocyte differentiation
28	0.83277	0.86867	Inwardly rectifying K+ channels
87	0.834298	0.771874	RNA Polymerase II Transcription
11	0.834482	0.647325	Condensation of Prometaphase Chromosomes
15	0.8345	0.594948	p130Cas linkage to MAPK signaling for integrins
16	0.834566	0.697914	Homologous Recombination Repair
16	0.834566	0.697914	Homologous recombination repair of replication-independent double-strand breaks
95	0.834595	0.803399	Signaling by Insulin receptor
26	0.835189	0.703315	Transcriptional regulation of pluripotent stem cells
18	0.835967	0.326557	Detoxification of Reactive Oxygen Species
74	0.836635	0.859575	IGF1R signaling cascade
74	0.836635	0.859575	Signaling by Type 1 Insulin-like Growth Factor 1 Receptor (IGF1R)
73	0.836804	0.781789	Nonsense Mediated Decay (NMD) independent of the Exon Junction Complex (EJC)
72	0.83802	0.859827	IRS-related events triggered by IGF1R
77	0.838709	0.871735	L1CAM interactions
12	0.838971	0.811448	Prolactin receptor signaling
76	0.83995	0.815861	Regulation of mRNA stability by proteins that bind AU-rich elements
69	0.840185	0.864433	IRS-mediated signalling
57	0.840609	0.838903	Oxidative Stress Induced Senescence
28	0.841248	0.733412	Lipoprotein metabolism
55	0.841773	0.818043	ER-Phagosome pathway
21	0.8419	0.760485	RORA activates circadian gene expression
25	0.84204	0.888168	Dual incision reaction in TC-NER
25	0.84204	0.888168	Formation of transcription-coupled NER (TC-NER) repair complex
59	0.842117	0.864228	PI3K Cascade
29	0.844536	0.815934	Nuclear import of Rev protein
23	0.845	0.734905	Basigin interactions
95	0.84511	0.773403	DNA Replication
88	0.846581	0.800308	Synthesis of DNA
27	0.846757	0.808197	Export of Viral Ribonucleoproteins from Nucleus
27	0.846757	0.808197	NEP/NS2 Interacts with the Cellular Export Machinery
12	0.847205	0.853669	Activation of Rac
73	0.849335	0.880321	Insulin receptor signalling cascade
70	0.849807	0.879885	IRS-related events
78	0.850037	0.783744	Mitotic Prophase
54	0.850816	0.796371	Cell-cell junction organization
18	0.850883	0.704022	Na+/Cl- dependent neurotransmitter transporters
30	0.850933	0.79428	FCERI mediated MAPK activation
43	0.852816	0.853794	Apoptotic execution phase
26	0.852817	0.7435	Tight junction interactions
32	0.853469	0.803274	Interactions of Rev with host cellular proteins
19	0.853696	0.761671	Syndecan interactions
83	0.854631	0.846523	PCP/CE pathway
41	0.854712	0.693581	Mitochondrial protein import
37	0.855653	0.798802	Glucose transport
26	0.856069	0.913573	Adrenaline,noradrenaline inhibits insulin secretion
32	0.856086	0.592463	Signalling to ERKs
55	0.856214	0.89008	Translocation of GLUT4 to the plasma membrane
30	0.856559	0.799833	Rev-mediated nuclear export of HIV RNA
74	0.856573	0.804793	DNA Replication Pre-Initiation
74	0.856573	0.804793	M/G1 Transition
45	0.856907	0.829248	Regulation of activated PAK-2p34 by proteasome mediated degradation
72	0.85741	0.81849	Platelet homeostasis
22	0.857725	0.829853	The canonical retinoid cycle in rods (twilight vision)
22	0.858055	0.801757	Oncogene Induced Senescence
18	0.858534	0.736732	Telomere C-strand (Lagging Strand) Synthesis
72	0.85924	0.758677	Eukaryotic Translation Elongation
68	0.859251	0.786354	Eukaryotic Translation Termination
69	0.859378	0.759874	Peptide chain elongation
48	0.859545	0.826904	Vif-mediated degradation of APOBEC3G
46	0.860225	0.82771	Ubiquitin-dependent degradation of Cyclin D
46	0.860225	0.82771	Ubiquitin-dependent degradation of Cyclin D1
13	0.86024	0.869683	SHC-mediated signalling
47	0.86029	0.672798	Vpu mediated degradation of CD4
28	0.860576	0.828131	Adherens junctions interactions
46	0.860753	0.791207	CDK-mediated phosphorylation and removal of Cdc6
17	0.860863	0.682418	Cholesterol biosynthesis
49	0.860957	0.839007	AUF1 (hnRNP D0) destabilizes mRNA
33	0.861621	0.853887	Apoptotic cleavage of cellular proteins
26	0.862693	0.806338	GPVI-mediated activation cascade
26	0.865244	0.853691	Activation of the pre-replicative complex
49	0.867046	0.722892	Synthesis of substrates in N-glycan biosythesis
20	0.867381	0.791236	REV-ERBA represses gene expression
50	0.867435	0.854867	Ca2+ pathway
68	0.867527	0.794962	Viral mRNA Translation
40	0.868938	0.925238	Regulation of water balance by renal Aquaporins
17	0.86896	0.770255	Prostacyclin signalling through prostacyclin receptor
35	0.869019	0.931938	Activation of GABAB receptors
35	0.869019	0.931938	GABA B receptor activation
22	0.869503	0.782103	Signaling by BMP
71	0.870246	0.801153	Regulation of DNA replication
17	0.871448	0.809267	Chylomicron-mediated lipid transport
21	0.872131	0.861159	Nuclear Events (kinase and transcription factor activation)
18	0.87227	0.898547	G beta:gamma signalling through PLC beta
10	0.872353	0.892013	Retrograde neurotrophin signalling
54	0.872645	0.903329	Senescence-Associated Secretory Phenotype (SASP)
19	0.872688	0.908655	Downregulation of SMAD2/3:SMAD4 transcriptional activity
47	0.872887	0.827313	Autodegradation of the E3 ubiquitin ligase COP1
47	0.872887	0.827313	Stabilization of p53
41	0.873819	0.925519	PLC beta mediated events
96	0.873851	0.833424	Signaling by Interleukins
19	0.874295	0.840336	Regulatory RNA pathways
42	0.874637	0.925656	G-protein mediated events
52	0.874926	0.821671	degradation of DVL
22	0.875554	0.883981	CTLA4 inhibitory signaling
25	0.875582	0.896333	G-protein beta:gamma signalling
18	0.875623	0.474792	Generation of second messenger molecules
48	0.875644	0.821901	Ubiquitin Mediated Degradation of Phosphorylated Cdc25A
48	0.875644	0.821901	p53-Independent DNA Damage Response
48	0.875644	0.821901	p53-Independent G1/S DNA damage checkpoint
17	0.876173	0.932464	PKA activation in glucagon signalling
23	0.876329	0.897868	ADP signalling through P2Y purinoceptor 1
68	0.876418	0.809983	Removal of licensing factors from origins
46	0.876485	0.861505	Nuclear Envelope Breakdown
27	0.876742	0.899278	Signal amplification
18	0.876813	0.876739	Synthesis of IP3 and IP4 in the cytosol
16	0.87727	0.936996	PKA activation
17	0.877741	0.936996	PKA-mediated phosphorylation of CREB
66	0.878099	0.855276	Orc1 removal from chromatin
66	0.878099	0.855276	Switching of origins to a post-replicative state
24	0.878444	0.825698	FCERI mediated Ca+2 mobilization
20	0.878811	0.854441	Growth hormone receptor signaling
50	0.878866	0.785582	SCF-beta-TrCP mediated degradation of Emi1
18	0.879896	0.704043	Pre-NOTCH Processing in Golgi
42	0.880002	0.931931	G alpha (z) signalling events
33	0.880051	0.911659	PLC-gamma1 signalling
21	0.880469	0.786749	IKK complex recruitment mediated by RIP1
30	0.88055	0.829684	Global Genomic NER (GG-NER)
51	0.880641	0.84089	Circadian Clock
19	0.880791	0.856507	Role of phospholipids in phagocytosis
16	0.88083	0.842167	Amino acid synthesis and interconversion (transamination)
75	0.881046	0.801472	Cell junction organization
33	0.881298	0.848742	BMAL1:CLOCK,NPAS2 activates circadian gene expression
36	0.881471	0.098978	Meiotic recombination
20	0.881535	0.902941	Thromboxane signalling through TP receptor
15	0.881997	0.812446	Signaling by Hippo
31	0.882873	0.92618	DAG and IP3 signaling
50	0.882885	0.844823	NCAM signaling for neurite out-growth
42	0.883385	0.587387	TCR signaling
45	0.883469	0.843488	Nucleotide Excision Repair
22	0.883665	0.89824	G beta:gamma signalling through PI3Kgamma
68	0.884723	0.850441	Fcgamma receptor (FCGR) dependent phagocytosis
33	0.885892	0.810164	Inositol phosphate metabolism
28	0.88666	0.938372	Ca-dependent events
18	0.886904	0.911072	ADP signalling through P2Y purinoceptor 12
26	0.887011	0.849047	CDO in myogenesis
26	0.887011	0.849047	Myogenesis
26	0.887064	0.93945	CaM pathway
26	0.887064	0.93945	Calmodulin induced events
41	0.887255	0.847275	Transcription-coupled NER (TC-NER)
13	0.889243	0.790296	Amine-derived hormones
12	0.88948	0.943611	p75NTR recruits signalling complexes
11	0.890861	0.474424	Regulation of IFNG signaling
45	0.891167	0.767258	Mitochondrial biogenesis
45	0.891167	0.767258	Organelle biogenesis and maintenance
18	0.891518	0.872497	FCERI mediated NF-kB activation
61	0.891573	0.839834	Activation of NF-kappaB in B cells
25	0.892493	0.598197	Downregulation of TGF-beta receptor signaling
52	0.893163	0.831302	p53-Dependent G1 DNA Damage Response
52	0.893163	0.831302	p53-Dependent G1/S DNA damage checkpoint
12	0.893671	0.918596	NF-kB is activated and signals survival
18	0.894275	0.822698	Platelet calcium homeostasis
13	0.894964	0.763271	p38MAPK events
29	0.895044	0.942452	Glucagon signaling in metabolic regulation
32	0.896245	0.761331	Neurotransmitter Release Cycle
19	0.896483	0.906673	Presynaptic function of Kainate receptors
55	0.896888	0.82585	G1/S DNA Damage Checkpoints
24	0.897117	0.931344	G-protein activation
33	0.89749	0.930947	EGFR interacts with phospholipase C-gamma
10	0.897748	0.874031	Signaling by NOTCH4
58	0.898633	0.851215	Asymmetric localization of PCP proteins
48	0.898769	0.79889	Clathrin derived vesicle budding
48	0.898769	0.79889	trans-Golgi Network Vesicle Budding
25	0.899027	0.739523	Signalling to RAS
47	0.899867	0.922786	GABA receptor activation
94	0.899868	0.949704	mRNA Splicing
94	0.899868	0.949704	mRNA Splicing - Major Pathway
90	0.900104	0.873492	Cap-dependent Translation Initiation
90	0.900104	0.873492	Eukaryotic Translation Initiation
13	0.900502	0.850788	Glycogen synthesis
10	0.900666	0.916389	Interleukin-6 signaling
15	0.902069	0.925346	p75NTR signals via NF-kB
33	0.903613	0.857382	Binding and Uptake of Ligands by Scavenger Receptors
62	0.904039	0.844716	Cyclin E associated events during G1/S transition
12	0.904433	0.849885	Organic cation/anion/zwitterion transport
50	0.905024	0.874381	degradation of AXIN
22	0.905116	0.845208	Nitric oxide stimulates guanylate cyclase
88	0.905553	0.879483	SRP-dependent cotranslational protein targeting to membrane
39	0.905584	0.882691	formation of the beta-catenin:TCF transactivating complex
18	0.906318	0.886141	Signal transduction by L1
49	0.907566	0.862186	Regulation of actin dynamics for phagocytic cup formation
10	0.908798	0.720504	Signaling by NOTCH3
16	0.909208	0.841355	Regulation of signaling by CBL
34	0.910057	0.936416	PLCG1 events in ERBB2 signaling
25	0.911086	0.943756	SMAD2/SMAD3:SMAD4 heterotrimer regulates transcription
17	0.913229	0.852182	Scavenging by Class A Receptors
16	0.913449	0.805371	Gap-filling DNA repair synthesis and ligation in GG-NER
16	0.913449	0.805371	Gap-filling DNA repair synthesis and ligation in TC-NER
11	0.913728	0.855821	DSCAM interactions
53	0.913822	0.834707	SCF(Skp2)-mediated degradation of p27/p21
14	0.914121	0.787188	Receptor-ligand binding initiates the second proteolytic cleavage of Notch receptor
12	0.914317	0.837567	Cell-extracellular matrix interactions
63	0.914984	0.817501	Cyclin A:Cdk2-associated events at S phase entry
27	0.915439	0.84012	Activated NOTCH1 Transmits Signal to the Nucleus
15	0.915563	0.750543	Ras activation uopn Ca2+ infux through NMDA receptor
84	0.91633	0.869403	GTP hydrolysis and joining of the 60S ribosomal subunit
30	0.916391	0.930768	deactivation of the beta-catenin transactivating complex
46	0.917358	0.829177	Nuclear Receptor transcription pathway
34	0.917388	0.932792	Transcriptional activity of SMAD2/SMAD3:SMAD4 heterotrimer
85	0.917491	0.869479	3 -UTR-mediated translational regulation
85	0.917491	0.869479	L13a-mediated translational silencing of Ceruloplasmin expression
11	0.917861	0.905321	ATF6-alpha activates chaperones
77	0.918123	0.865433	Formation of a pool of free 40S subunits
14	0.918247	0.906255	Constitutive Signaling by NOTCH1 HD Domain Mutants
31	0.918625	0.843586	Post NMDA receptor activation events
21	0.918738	0.870304	YAP1- and WWTR1 (TAZ)-stimulated gene expression
16	0.919305	0.832605	G1/S-Specific Transcription
34	0.919703	0.83847	Activation of NMDA receptor upon glutamate binding and postsynaptic events
15	0.919958	0.63838	Association of licensing factors with the pre-replicative complex
19	0.92057	0.903757	Deadenylation of mRNA
62	0.921529	0.802795	Loss of Function of SMAD2/3 in Cancer
62	0.921529	0.802795	Loss of Function of SMAD4 in Cancer
62	0.921529	0.802795	Loss of Function of TGFBR1 in Cancer
62	0.921529	0.802795	Loss of Function of TGFBR2 in Cancer
62	0.921529	0.802795	SMAD2/3 MH2 Domain Mutants in Cancer
62	0.921529	0.802795	SMAD2/3 Phosphorylation Motif Mutants in Cancer
62	0.921529	0.802795	SMAD4 MH2 Domain Mutants in Cancer
62	0.921529	0.802795	Signaling by TGF-beta Receptor Complex
62	0.921529	0.802795	Signaling by TGF-beta Receptor Complex in Cancer
62	0.921529	0.802795	TGFBR1 KD Mutants in Cancer
62	0.921529	0.802795	TGFBR1 LBD Mutants in Cancer
62	0.921529	0.802795	TGFBR2 Kinase Domain Mutants in Cancer
62	0.921529	0.802795	TGFBR2 MSI Frameshift Mutants in Cancer
30	0.922053	0.768384	TGF-beta receptor signaling activates SMADs
25	0.922651	0.80248	Cellular response to hypoxia
25	0.922651	0.80248	Regulation of Hypoxia-inducible Factor (HIF) by oxygen
39	0.924767	0.771698	tRNA Aminoacylation
22	0.926199	0.90013	EGFR downregulation
24	0.926827	0.848046	Synthesis of PIPs at the plasma membrane
12	0.928179	0.919438	AKT phosphorylates targets in the cytosol
22	0.928502	0.9511	Activation of G protein gated Potassium channels
22	0.928502	0.9511	G protein gated Potassium channels
22	0.928502	0.9511	Inhibition of voltage gated Ca2+ channels via Gbeta/gamma subunits
84	0.930857	0.897839	Influenza Viral RNA Transcription and Replication
15	0.931267	0.803688	Repair synthesis for gap-filling by DNA polymerase in TC-NER
15	0.931267	0.803688	Repair synthesis of patch ~27-30 bases long by DNA polymerase
40	0.931646	0.826561	Interleukin-3, 5 and GM-CSF signaling
14	0.932643	0.952838	SHC-related events
14	0.933375	0.917389	NRIF signals cell death from the nucleus
24	0.934071	0.679769	Endosomal Sorting Complex Required For Transport (ESCRT)
10	0.934721	0.966887	Activation of the AP-1 family of transcription factors
41	0.936505	0.870987	PI Metabolism
10	0.938426	0.943736	Regulation of Rheb GTPase activity by AMPK
10	0.939003	0.871469	Activation of PPARGC1A (PGC-1alpha) by phosphorylation
15	0.939142	0.874266	Frs2-mediated activation
18	0.939188	0.802896	Oxygen-dependent proline hydroxylation of Hypoxia-inducible Factor Alpha
16	0.939293	0.930154	Energy dependent regulation of mTOR by LKB1-AMPK
17	0.939777	0.553166	GABA synthesis, release, reuptake and degradation
19	0.940205	0.914249	NOTCH2 Activation and Transmission of Signal to the Nucleus
13	0.940333	0.794733	Synthesis and interconversion of nucleotide di- and triphosphates
16	0.940591	0.880322	Prolonged ERK activation events
12	0.941027	0.769263	Bile salt and organic anion SLC transporters
14	0.941038	0.853085	ARMS-mediated activation
24	0.941284	0.935887	mTOR signalling
20	0.941315	0.867817	Nephrin interactions
25	0.941409	0.935959	PKB-mediated events
13	0.941946	0.939181	Regulation of AMPK activity via LKB1
12	0.942784	0.772068	Advanced glycosylation endproduct receptor signaling
27	0.942929	0.969564	mRNA Capping
27	0.943118	0.935897	MAPK targets/ Nuclear events mediated by MAP kinases
23	0.943616	0.835367	CREB phosphorylation through the activation of Ras
15	0.944092	0.903223	Branched-chain amino acid catabolism
22	0.944913	0.724442	Interleukin receptor SHC signaling
23	0.945033	0.941422	Interaction between L1 and Ankyrins
41	0.94522	0.7871	Golgi Associated Vesicle Biogenesis
13	0.945313	0.901026	SOS-mediated signalling
11	0.947722	0.96048	Signal attenuation
32	0.947739	0.898543	Cyclin D associated events in G1
32	0.947739	0.898543	G1 Phase
31	0.948369	0.779848	Sialic acid metabolism
14	0.949112	0.774587	Activation of BAD and translocation to mitochondria
13	0.95041	0.943635	Depolymerisation of the Nuclear Lamina
18	0.95067	0.847007	Mitochondrial tRNA aminoacylation
10	0.952303	0.878281	ATF6-alpha activates chaperone genes
29	0.956423	0.890951	Sphingolipid de novo biosynthesis
36	0.956612	0.955636	HIV Transcription Initiation
36	0.956612	0.955636	RNA Polymerase II HIV Promoter Escape
36	0.956612	0.955636	RNA Polymerase II Promoter Escape
36	0.956612	0.955636	RNA Polymerase II Transcription Initiation
36	0.956612	0.955636	RNA Polymerase II Transcription Initiation And Promoter Clearance
36	0.956612	0.955636	RNA Polymerase II Transcription Pre-Initiation And Promoter Opening
14	0.957103	0.940402	Glutamate Neurotransmitter Release Cycle
25	0.958783	0.971165	RNA Pol II CTD phosphorylation and interaction with CE
41	0.960883	0.971464	mRNA Splicing - Minor Pathway
17	0.96147	0.909565	Regulation of gene expression in beta cells
11	0.961572	0.807007	DEx/H-box helicases activate type I IFN and inflammatory cytokines production
13	0.962066	0.797827	Synthesis of Prostaglandins (PG) and Thromboxanes (TX)
12	0.962383	0.909462	FCGR activation
16	0.9628	0.604304	Activation of IRF3/IRF7 mediated by TBK1/IKK epsilon
20	0.963107	0.795227	Signaling by Leptin
14	0.963141	0.779711	Unblocking of NMDA receptor, glutamate binding and activation
13	0.963621	0.797537	CREB phosphorylation through the activation of CaMKII
35	0.963994	0.889695	Interleukin-2 signaling
21	0.964201	0.963347	PRC2 methylates histones and DNA
14	0.967637	0.940782	SHC1 events in EGFR signaling
22	0.967639	0.708662	The role of Nef in HIV-1 replication and disease pathogenesis
21	0.96776	0.910131	Insulin processing
16	0.968948	0.964802	Synthesis of PIPs at the Golgi membrane
20	0.96934	0.876672	Lysosome Vesicle Biogenesis
15	0.970274	0.907256	Formation of ATP by chemiosmotic coupling
10	0.970383	0.359878	GABA A receptor activation
16	0.970847	0.785924	TGF-beta receptor signaling in EMT (epithelial to mesenchymal transition)
17	0.971229	0.945191	cGMP effects
27	0.97233	0.812872	Regulation of beta-cell development
21	0.972641	0.889231	G0 and Early G1
10	0.972997	0.94805	Neurotoxicity of clostridium toxins
13	0.973184	0.92327	WNT5A-dependent internalization of FZD4
13	0.97369	0.943016	GRB2 events in EGFR signaling
42	0.974849	0.95842	Ribosomal scanning and start codon recognition
44	0.975137	0.958376	Activation of the mRNA upon binding of the cap-binding complex and eIFs, and subsequent binding to 43S
43	0.975137	0.958376	Translation initiation complex formation
15	0.976183	0.633969	Nef-mediates down modulation of cell surface receptors by recruiting them to clathrin adapters
16	0.976922	0.972018	Spry regulation of FGF signaling
37	0.977487	0.965269	Formation of the ternary complex, and subsequently, the 43S complex
14	0.983947	0.869498	Regulation of KIT signaling
11	0.98461	0.944696	Assembly Of The HIV Virion
20	0.984669	0.899529	Budding and maturation of HIV virion
11	0.985274	0.963079	PECAM1 interactions
14	0.985594	0.893866	TRAF6 mediated induction of TAK1 complex
18	0.987923	0.974688	Signaling by constitutively active EGFR
10	0.988307	0.939026	Trafficking of GluR2-containing AMPA receptors
14	0.992073	0.980734	Viral Messenger RNA Synthesis
18	0.992382	0.96069	MicroRNA (miRNA) biogenesis
11	0.995208	0.990585	Initiation of Nuclear Envelope Reformation
11	0.995208	0.990585	Nuclear Envelope Reassembly
